# Supplementary material for: GANT61 induces cell cycle resting and autophagy by down-regulating RNAP III signal pathway and tRNA-Gly-CCC synthesis to combate chondrosarcoma
Source: Research Square preprint supplement (doi:10.21203/rs.3.rs-2480370/v1), 2023-02-14
Supplement: Supplementary file 1 [file 605fb45480f5d7f4c33fe531.xlsx]

## Sheet: Sheet1
ID	Primer name	Direction	Primer seq	product	Tm	Gc%
1	h_IHH_fwd	fwd	CTGGCCAATGTGACCGTAGT	102	60.04	55
2	h_IHH_rev	rev	GTGGGGATCATGGTTCAGCA		60.03	55
3	h_PTCH1_fwd	fwd	TGTGGCTGAGAGCGAAGTTT	84	59.89	50
4	h_PTCH1_rev	rev	CCACAACCAAGAACTTGCCG		59.97	55
5	h_SMO_fwd	fwd	CAGGGCACCGTATTCCTCTC	175	59.89	60
6	h_SMO_rev	rev	AAACGCAAAGAGGTTGGCAC		59.9	50
7	h_GLI1_fwd	fwd	CTCTTGCTTCCAGCTACCCC	73	60.11	60
8	h_GLI1_rev	rev	GCCCCTCACCTCCCTTCTAT		60.4	60
9	h_GLI2_fwd	fwd	TGCAACGTCCACCCACTTTA	118	59.82	50
10	h_GLI2_rev	rev	GGATACCAGGCATGCACACT		60.11	55
11	h_CDK1_fwd	fwd	TGCTTATGCAGGATTCCAGGT	96	59.43	47.62
12	h_CDK1_rev	rev	CCATGTACTGACCAGGAGGGA		60.62	57.14
13	h_Cyclin A2 _fwd	fwd	GCACTGGTGGTCTGTGTTCT	144	60.18	55
14	h_Cyclin A2_rev	rev	TGGATGCCAGTCTTACTCATAGC		59.93	47.83
15	h_Caspase3 _fwd	fwd	TGGTTTGAGCCTGAGCAGAG	122	59.96	55
16	h_Caspase3_rev	rev	TGGCAGCATCATCCACACAT		60.03	50
