# Supplementary material for: GANT61 induces cell cycle resting and autophagy by down-regulating RNAP III signal pathway and tRNA-Gly-CCC synthesis to combate chondrosarcoma
Source: Research Square preprint supplement (doi:10.21203/rs.3.rs-2480370/v1), 2023-02-14
Supplement: Supplementary file 2 [file ccd42ea4e13c13053b2d64c3.xlsx]

## Sheet: Different Gene
Entrez	Gene Symbol	Gene Title	A12706	A12707	A12708	A12709	A12710	A12711	Fold Change	logFC	absolute FC	Regulation	P-value	FDR
79006	METRN	meteorin, glial cell differentiation regulator	10.7013	10.5537	10.6608	8.96837	8.95724	8.89567	-3.24488	-1.69816	3.24488	down	2.29323e-13	1.06302e-11
285834	HCG22	HLA complex group 22	8.74864	8.70796	8.67208	5.88141	5.91966	5.82016	-7.13947	-2.83582	7.13947	down	1.69696e-14	1.99025e-12
130574	LYPD6	LY6/PLAUR domain containing 6	7.64131	7.30918	7.49651	5.39408	5.53445	5.54819	-3.97263	-1.99009	3.97263	down	1.35563e-10	1.2354e-09
10190	TXNDC9	thioredoxin domain containing 9	4.38522	4.46778	4.62876	5.90362	6.09557	6.17871	2.95955	1.56538	2.95955	up	8.53779e-09	4.04063e-08
79915	ATAD5	ATPase family, AAA domain containing 5	6.92563	6.85449	6.82597	5.60453	5.59998	5.82579	-2.28458	-1.19193	2.28458	down	1.55381e-08	6.80394e-08
27332	ZNF638	zinc finger protein 638	5.84387	6.0058	6.12125	7.82507	7.64151	7.73349	3.34742	1.74305	3.34742	up	1.95379e-10	1.66955e-09
388677	NOTCH2NL	notch 2 N-terminal like	9.74999	9.73652	9.82205	11.0931	10.9846	11.0119	2.39552	1.26034	2.39552	up	1.94704e-12	4.71278e-11
359948	IRF2BP2	interferon regulatory factor 2 binding protein 2	10.4547	10.4534	10.5018	11.445	11.4901	11.5228	2.02232	1.01601	2.02232	up	3.4015e-12	7.16899e-11
4163	MCC	mutated in colorectal cancers	5.96007	6.01622	5.88026	6.9342	6.96762	7.00537	2.02354	1.01688	2.02354	up	1.62731e-08	7.08449e-08
705	BYSL	bystin like	8.90784	8.82969	8.91009	10.295	10.2741	10.2794	2.63953	1.40028	2.63953	up	3.88138e-13	1.54926e-11
113	ADCY7	adenylate cyclase 7	7.38808	7.4211	7.48027	5.93238	5.82352	5.75228	-3.01834	-1.59376	3.01834	down	1.31792e-10	1.20666e-09
285596	FAM153A	family with sequence similarity 153 member A	6.50056	6.32676	6.60565	4.72147	5.25913	4.68883	-3.006	-1.58785	3.006	down	1.81235e-07	6.01709e-07
117854	TRIM6	tripartite motif containing 6	7.83632	7.84619	7.77465	5.82447	5.54867	5.49145	-4.58691	-2.19752	4.58691	down	2.80199e-11	3.54922e-10
7673	ZNF222	zinc finger protein 222	6.01722	6.07997	5.94103	7.48329	7.65578	7.69191	3.02637	1.59759	3.02637	up	1.97391e-10	1.68379e-09
220594	USP32P2	ubiquitin specific peptidase 32 pseudogene 2	5.72717	5.81493	5.52955	7.81222	7.90391	7.95866	4.59813	2.20105	4.59813	up	1.43239e-11	2.13314e-10
728635	DHRS4L1	dehydrogenase/reductase (SDR family) member 4 like 1	8.6453	8.57482	8.54099	7.28915	7.30019	7.54016	-2.31424	-1.21054	2.31424	down	1.48728e-09	9.01199e-09
2237	FEN1	flap structure-specific endonuclease 1	10.7007	10.7523	10.7111	8.79841	8.82694	8.81249	-3.75478	-1.90873	3.75478	down	4.83137e-15	9.03327e-13
162632	USP32P1	ubiquitin specific peptidase 32 pseudogene 1	5.72717	5.81493	5.52955	7.81222	7.90391	7.95866	4.59813	2.20105	4.59813	up	1.43239e-11	2.13314e-10
4327	MMP19	matrix metallopeptidase 19	7.78412	7.63583	7.76944	6.69508	6.57051	6.42884	-2.24231	-1.16499	2.24231	down	8.08031e-09	3.85254e-08
4719	NDUFS1	NADH:ubiquinone oxidoreductase core subunit S1	10.6019	10.7054	10.603	9.55804	9.62177	9.59451	-2.06382	-1.04532	2.06382	down	1.54478e-11	2.24741e-10
10687	PNMA2	paraneoplastic Ma antigen 2	8.10158	7.9773	8.05089	6.7749	6.76242	6.51467	-2.56554	-1.35926	2.56554	down	1.20801e-09	7.5396e-09
788	SLC25A20	solute carrier family 25 (carnitine/acylcarnitine translocase), member 20	7.28616	7.30309	7.3732	5.93824	6.1234	6.17319	-2.36615	-1.24254	2.36615	down	4.01376e-09	2.09379e-08
135293	PM20D2	peptidase M20 domain containing 2	7.58283	7.69464	7.59613	5.72878	5.88388	5.8982	-3.45235	-1.78758	3.45235	down	3.82461e-11	4.51907e-10
1009	CDH11	cadherin 11, type 2, OB-cadherin (osteoblast)	5.12924	5.56687	4.71243	4.00641	4.15872	3.94434	-2.14309	-1.09969	2.14309	down	5.3141e-05	0.000113967
7090	TLE3	transducin like enhancer of split 3	6.16108	6.20493	6.17673	8.37258	8.41476	8.38433	4.62561	2.20964	4.62561	up	1.67085e-13	8.52508e-12
8614	STC2	stanniocalcin 2	10.6878	10.6011	10.6201	9.39999	9.27095	9.31318	-2.47647	-1.30828	2.47647	down	2.74071e-12	6.09554e-11
8402	SLC25A11	solute carrier family 25 (mitochondrial carrier; oxoglutarate carrier), member 11	9.30753	9.30999	9.37228	7.52302	7.6201	7.62082	-3.34488	-1.74195	3.34488	down	4.10712e-13	1.60494e-11
3084	NRG1	neuregulin 1	6.61966	6.8236	6.63998	5.05297	5.47085	5.13825	-2.77738	-1.47372	2.77738	down	3.32763e-08	1.33231e-07
9123	SLC16A3	solute carrier family 16 (monocarboxylate transporter), member 3	11.3959	11.4037	11.4	9.76088	9.63621	9.66768	-3.27528	-1.71162	3.27528	down	3.3426e-14	2.96188e-12
10228	STX6	syntaxin 6	7.18265	7.249	7.1793	8.53541	8.56546	8.54556	2.54058	1.34516	2.54058	up	1.253e-11	1.92466e-10
101060429	LOC101060429	polycystin-1-like	6.56125	6.67228	6.6949	8.26408	8.25865	8.2081	3.03311	1.6008	3.03311	up	1.17136e-11	1.828e-10
55170	PRMT6	protein arginine methyltransferase 6	6.53841	6.50412	6.5357	4.638	4.77341	4.81489	-3.44374	-1.78398	3.44374	down	2.10877e-10	1.77825e-09
163590	TOR1AIP2	torsin A interacting protein 2	4.01921	3.9168	3.825	4.51382	5.10869	5.14733	2.00408	1.00294	2.00408	up	4.1618e-05	9.07536e-05
653781	POTEJ	POTE ankyrin domain family member J	9.7641	10.0177	10.1	9.02679	8.99633	8.83567	-2.01067	-1.00768	2.01067	down	3.48312e-08	1.38718e-07
29035	C16orf72	chromosome 16 open reading frame 72	8.40571	8.34142	8.30517	9.96357	9.9999	10.0422	3.14079	1.65113	3.14079	up	2.18186e-13	1.026e-11
29997	GLTSCR2	glioma tumor suppressor candidate region gene 2	5.80305	5.8921	5.72362	7.43281	6.82587	6.91432	2.38074	1.25141	2.38074	up	1.08368e-06	3.08112e-06
389705	LOC389705	chromosome 4 open reading frame 27 pseudogene	8.73049	8.60231	8.54327	6.63143	6.61984	6.59432	-4.02827	-2.01016	4.02827	down	1.12834e-12	3.2067e-11
23176	SEPT8	septin 8	8.90952	8.84055	8.86494	6.60108	7.04739	6.98657	-3.98153	-1.99332	3.98153	down	1.96314e-10	1.67643e-09
134353	LSM11	LSM11, U7 small nuclear RNA associated	6.33441	6.34107	6.15905	7.53177	7.51126	7.42733	2.31649	1.21194	2.31649	up	2.50976e-09	1.40326e-08
85403	EAF1	ELL associated factor 1	5.62263	5.39712	5.59238	7.46766	7.61322	7.75739	4.21455	2.07538	4.21455	up	8.07865e-11	8.14472e-10
152485	ZNF827	zinc finger protein 827	8.24824	8.22058	8.21941	6.0935	5.95267	5.98133	-4.65972	-2.22024	4.65972	down	5.68807e-13	1.99169e-11
79176	FBXL15	F-box and leucine-rich repeat protein 15	7.66983	7.6533	7.81578	6.19409	6.46227	6.2763	-2.64283	-1.40208	2.64283	down	1.62476e-09	9.71993e-09
1843	DUSP1	dual specificity phosphatase 1	7.29739	7.34807	7.47179	8.96654	8.92228	8.85077	2.90952	1.54078	2.90952	up	1.33893e-11	2.02638e-10
100526837	EEF1E1-BLOC1S5	EEF1E1-BLOC1S5 readthrough (NMD candidate)	6.66704	6.70263	6.83534	5.22421	5.49484	5.55668	-2.479	-1.30976	2.479	down	3.09647e-08	1.25156e-07
22948	CCT5	chaperonin containing TCP1, subunit 5 (epsilon)	4.9612	4.8761	4.75994	6.24841	6.24782	6.2781	2.62508	1.39236	2.62508	up	4.22645e-09	2.18896e-08
905	CCNT2	cyclin T2	4.44503	4.32791	4.18036	5.72074	6.11583	6.01342	3.09992	1.63223	3.09992	up	2.01977e-08	8.57432e-08
9700	ESPL1	extra spindle pole bodies like 1, separase	8.98138	8.77567	8.76688	7.37142	7.11632	7.21853	-3.04383	-1.60589	3.04383	down	1.61493e-10	1.42884e-09
164284	APCDD1L	adenomatosis polyposis coli down-regulated 1-like	10.517	10.4725	10.5486	8.10324	8.20987	8.16225	-5.1133	-2.35425	5.1133	down	3.24494e-15	7.24587e-13
5356	PLRG1	pleiotropic regulator 1	6.63414	6.53327	6.41109	7.40865	7.54242	7.70271	2.03509	1.02509	2.03509	up	9.07504e-08	3.23829e-07
642443	ADH5P4	alcohol dehydrogenase 5 (class III), chi polypeptide, pseudogene 4	8.52798	8.54438	8.41267	7.40459	7.34668	7.32121	-2.20002	-1.13752	2.20002	down	2.42488e-10	1.99572e-09
51035	UBXN1	UBX domain protein 1	4.58095	4.96842	5.15593	6.3354	6.15727	6.31393	2.57952	1.3671	2.57952	up	3.92485e-07	1.21319e-06
23304	UBR2	ubiquitin protein ligase E3 component n-recognin 2	6.91388	7.02096	7.00616	8.71847	8.75961	8.69333	3.3484	1.74347	3.3484	up	1.32551e-12	3.59287e-11
9185	REPS2	RALBP1 associated Eps domain containing 2	6.26668	6.28313	6.01619	7.46022	7.60113	7.47382	2.50196	1.32306	2.50196	up	4.48572e-09	2.3037e-08
163033	ZNF579	zinc finger protein 579	7.52844	7.67409	7.57715	9.00142	8.83453	8.83483	2.45723	1.29703	2.45723	up	1.4787e-10	1.32742e-09
3486	IGFBP3	insulin like growth factor binding protein 3	9.82893	9.79088	9.85533	6.92868	6.84278	6.86668	-7.70431	-2.94567	7.70431	down	8.11722e-16	3.52441e-13
7525	YES1	YES proto-oncogene 1, Src family tyrosine kinase	8.80921	8.70195	8.73279	10.1587	10.2163	10.2949	2.78045	1.47532	2.78045	up	1.71247e-12	4.31731e-11
171425	CLYBL	citrate lyase beta like	5.68785	5.61297	5.69879	3.83666	4.42384	4.46423	-2.68507	-1.42496	2.68507	down	8.74194e-07	2.5255e-06
27147	DENND2A	DENN/MADD domain containing 2A	8.39275	8.46391	8.51055	7.42779	7.34441	7.37125	-2.10612	-1.07459	2.10612	down	3.28476e-10	2.56358e-09
26036	ZNF451	zinc finger protein 451	4.92886	4.68232	4.99159	6.15831	6.67321	6.70026	3.12315	1.643	3.12315	up	1.16991e-07	4.05647e-07
151636	DTX3L	deltex 3 like, E3 ubiquitin ligase	8.72805	8.70386	8.854	7.73653	7.54409	7.66418	-2.164	-1.1137	2.164	down	1.03696e-09	6.64145e-09
5922	RASA2	RAS p21 protein activator 2	5.1658	5.18006	5.1277	6.66846	6.82946	6.63935	2.93746	1.55457	2.93746	up	7.24991e-10	4.92275e-09
283643	C14orf80	chromosome 14 open reading frame 80	7.54956	7.57404	7.75873	6.85346	6.45572	6.5272	-2.02135	-1.01532	2.02135	down	4.85858e-07	1.47394e-06
105369247	LOC105369247	nicotinate-nucleotide pyrophosphorylase [carboxylating]-like	8.17434	8.2961	8.26102	7.25363	7.17113	7.21801	-2.04141	-1.02956	2.04141	down	8.31949e-10	5.53929e-09
124446	TMEM219	transmembrane protein 219	8.86814	8.88956	8.9266	7.57236	7.63041	7.64906	-2.42417	-1.27749	2.42417	down	1.16116e-11	1.81717e-10
2195	FAT1	FAT atypical cadherin 1	10.7888	10.7638	10.6313	9.15864	9.38608	9.44917	-2.63293	-1.39667	2.63293	down	2.17504e-10	1.82469e-09
4521	NUDT1	nudix hydrolase 1	9.95894	10.0465	10.1124	7.98607	7.77655	7.76421	-4.58527	-2.19701	4.58527	down	5.84258e-13	2.02763e-11
9910	RABGAP1L	RAB GTPase activating protein 1-like	5.2832	4.98175	5.46946	7.23133	7.19147	7.31214	4.00049	2.00018	4.00049	up	1.02455e-09	6.57733e-09
64756	ATPAF1	ATP synthase mitochondrial F1 complex assembly factor 1	8.58825	8.57426	8.60656	7.29331	7.48007	7.58071	-2.20126	-1.13833	2.20126	down	2.3285e-09	1.3189e-08
11138	TBC1D8	TBC1 domain family member 8	7.67973	7.66004	7.76424	9.47011	9.51499	9.47697	3.44862	1.78602	3.44862	up	1.89913e-13	9.29979e-12
90809	TMEM55B	transmembrane protein 55B	8.24211	8.3773	8.50967	10.0096	9.921	9.89225	2.95795	1.5646	2.95795	up	2.41474e-11	3.18034e-10
5604	MAP2K1	mitogen-activated protein kinase kinase 1	9.6359	9.72405	9.74828	10.8168	10.7637	10.7369	2.09904	1.06973	2.09904	up	1.34695e-11	2.03695e-10
100532737	ATP6V1G2-DDX39B	ATP6V1G2-DDX39B readthrough (NMD candidate)	7.20019	7.20102	7.47832	5.93476	5.81458	5.90762	-2.65281	-1.40752	2.65281	down	3.67189e-09	1.93953e-08
128434	VSTM2L	V-set and transmembrane domain containing 2 like	7.0921	7.10686	7.19108	6.02298	6.08812	5.78008	-2.24433	-1.16629	2.24433	down	2.93076e-08	1.19123e-07
10308	ZNF267	zinc finger protein 267	6.50888	6.35424	6.56583	7.97977	8.50225	8.63186	3.71916	1.89498	3.71916	up	1.37536e-08	6.10807e-08
4205	MEF2A	myocyte enhancer factor 2A	7.04358	7.06282	6.95399	8.38389	8.58221	8.62181	2.84647	1.50917	2.84647	up	1.05658e-10	1.00949e-09
100288152	LOC100288152	uncharacterized LOC100288152	8.18125	8.18657	8.22985	7.20701	7.07255	7.18915	-2.06049	-1.04299	2.06049	down	8.67206e-10	5.7301e-09
677826	SNORA3B	small nucleolar RNA, H/ACA box 3B	5.42638	5.56234	5.52573	6.75224	6.63119	6.57331	2.21519	1.14743	2.21519	up	1.92763e-08	8.22697e-08
389336	C5orf46	chromosome 5 open reading frame 46	7.79457	7.85072	7.84432	4.87985	5.00036	4.79386	-7.66621	-2.93851	7.66621	down	2.57457e-13	1.14326e-11
990	CDC6	cell division cycle 6	10.0877	10.1802	10.2165	7.60149	7.82629	7.81391	-5.33036	-2.41423	5.33036	down	1.64717e-13	8.44707e-12
899	CCNF	cyclin F	7.02903	7.128	7.22769	5.66239	5.87697	5.90131	-2.48748	-1.31468	2.48748	down	7.52966e-09	3.62093e-08
79671	NLRX1	NLR family member X1	7.65194	7.8688	7.94597	6.73465	6.62354	6.60862	-2.24487	-1.16663	2.24487	down	9.9868e-09	4.62606e-08
23365	ARHGEF12	Rho guanine nucleotide exchange factor (GEF) 12	3.77082	3.33625	4.00892	4.9872	5.17928	5.00109	2.55005	1.35053	2.55005	up	1.98858e-06	5.39e-06
8566	PDXK	pyridoxal (pyridoxine, vitamin B6) kinase	5.52685	5.36158	5.36037	6.80857	6.74822	6.28055	2.29132	1.19618	2.29132	up	1.06461e-06	3.03198e-06
27247	NFU1	NFU1 iron-sulfur cluster scaffold	10.1662	10.0422	10.0116	8.77841	8.78552	8.74793	-2.46692	-1.30271	2.46692	down	6.21251e-12	1.11719e-10
58986	TMEM8A	transmembrane protein 8A	7.49718	7.54584	7.63774	8.85212	8.71863	8.67114	2.27686	1.18704	2.27686	up	3.8566e-10	2.91893e-09
8312	AXIN1	axin 1	6.92773	6.97489	7.00766	8.63103	8.61455	8.64182	3.15806	1.65904	3.15806	up	1.404e-12	3.75557e-11
151011	SEPT10	septin 10	9.98314	9.96877	9.81623	8.74944	8.8581	8.93548	-2.10678	-1.07504	2.10678	down	6.43396e-10	4.45543e-09
55275	VPS53	VPS53 GARP complex subunit	5.81949	6.04487	5.95453	7.63891	7.5618	7.49543	3.08603	1.62575	3.08603	up	1.95143e-10	1.6682e-09
30008	EFEMP2	EGF containing fibulin-like extracellular matrix protein 2	10.5089	10.4231	10.5015	8.72289	8.73904	8.71585	-3.36802	-1.7519	3.36802	down	3.18214e-14	2.87354e-12
3998	LMAN1	lectin, mannose-binding, 1	8.77017	8.76017	8.7961	10.1828	10.2288	10.2375	2.71492	1.44091	2.71492	up	2.0338e-13	9.76351e-12
11098	PRSS23	protease, serine 23	11.9824	12.0258	11.9505	7.84644	7.97527	8.01112	-16.4723	-4.04197	16.4723	down	1.58505e-17	3.75861e-14
10579	TACC2	transforming, acidic coiled-coil containing protein 2	8.06176	7.97347	8.02462	9.03132	9.23914	9.26159	2.23055	1.1574	2.23055	up	6.23479e-10	4.34213e-09
4763	NF1	neurofibromin 1	4.04306	3.49347	3.74567	5.13161	5.02743	4.96156	2.42749	1.27947	2.42749	up	9.70476e-07	2.78254e-06
9188	DDX21	DEAD (Asp-Glu-Ala-Asp) box helicase 21	10.3855	10.2605	10.2198	11.2636	11.2912	11.3308	2.00922	1.00663	2.00922	up	6.34046e-11	6.70439e-10
84255	SLC37A3	solute carrier family 37, member 3	6.68091	6.86962	7.05945	8.16537	8.07688	8.10606	2.37201	1.24611	2.37201	up	8.94626e-09	4.20437e-08
10253	SPRY2	sprouty RTK signaling antagonist 2	7.37384	7.29607	7.31371	10.3503	10.4652	10.5811	8.80097	3.13766	8.80097	up	3.21734e-15	7.22552e-13
8836	GGH	gamma-glutamyl hydrolase (conjugase, folylpolygammaglutamyl hydrolase)	9.77647	9.76133	9.73548	8.53148	8.68857	8.74899	-2.14565	-1.10141	2.14565	down	2.34947e-10	1.94555e-09
55122	AKIRIN2	akirin 2	9.09676	9.05962	9.08906	10.4147	10.4592	10.4035	2.53849	1.34397	2.53849	up	3.14514e-13	1.33081e-11
728026	LOC728026	prothymosin alpha-like	12.5214	12.5366	12.5402	11.4396	11.4232	11.4659	-2.12842	-1.08978	2.12842	down	2.26375e-13	1.05436e-11
10090	UST	uronyl-2-sulfotransferase	6.98247	7.00364	7.00364	8.25292	8.46617	8.46976	2.63847	1.3997	2.63847	up	1.55494e-10	1.38285e-09
90196	SYS1	Sys1 golgi trafficking protein	6.6636	6.71692	6.90008	8.07018	7.83236	7.85984	2.23549	1.16059	2.23549	up	1.40206e-08	6.21253e-08
51526	OSER1	oxidative stress responsive serine-rich 1	8.67833	8.70195	8.80145	10.0222	10.0819	10.0792	2.5207	1.33382	2.5207	up	2.86538e-12	6.31066e-11
23208	SYT11	synaptotagmin 11	5.83554	6.08462	5.96957	4.23992	4.57854	4.73723	-2.72202	-1.44468	2.72202	down	1.58037e-07	5.3238e-07
9541	CIR1	corepressor interacting with RBPJ, 1	6.27641	5.96022	6.02064	7.20021	7.23537	7.40806	2.29017	1.19546	2.29017	up	4.3621e-08	1.69055e-07
2124	EVI2B	ecotropic viral integration site 2B	6.18348	6.03199	6.26429	5.01675	4.8483	4.89951	-2.35937	-1.2384	2.35937	down	3.48842e-08	1.38886e-07
80349	WDR61	WD repeat domain 61	4.96108	4.63782	5.07763	6.0409	6.07138	6.14036	2.28475	1.19204	2.28475	up	3.49772e-07	1.09357e-06
56902	PNO1	partner of NOB1 homolog	8.47329	8.45052	8.42739	9.56358	9.59159	9.6707	2.23182	1.15822	2.23182	up	1.26742e-11	1.94148e-10
18	ABAT	4-aminobutyrate aminotransferase	6.3117	6.48008	6.5484	5.0317	4.99516	5.10143	-2.64628	-1.40396	2.64628	down	5.21128e-09	2.6239e-08
7321	UBE2D1	ubiquitin conjugating enzyme E2D 1	8.76205	8.73165	8.73223	9.85145	9.96641	9.99839	2.29226	1.19677	2.29226	up	1.37932e-11	2.06991e-10
4212	MEIS2	Meis homeobox 2	8.17543	8.31863	8.21108	6.74804	7.28572	7.19412	-2.23316	-1.15909	2.23316	down	4.20498e-07	1.29272e-06
9846	GAB2	GRB2 associated binding protein 2	7.33973	7.35004	7.41962	9.2974	9.33934	9.27624	3.82254	1.93453	3.82254	up	9.97904e-14	6.03639e-12
6909	TBX2	T-box 2	5.66622	5.54938	5.70186	7.94872	7.81696	7.96502	4.82684	2.27108	4.82684	up	2.44415e-12	5.5691e-11
554313	HIST2H4B	histone cluster 2, H4b	5.34573	5.37329	5.72715	4.6869	4.19479	4.33838	-2.10726	-1.07537	2.10726	down	9.44764e-06	2.27527e-05
256227	STEAP1B	STEAP family member 1B	9.30031	9.43395	9.55674	7.35604	7.25687	7.3039	-4.36121	-2.12473	4.36121	down	9.55152e-13	2.84269e-11
51645	PPIL1	peptidylprolyl isomerase like 1	9.70204	9.59654	9.61612	8.62662	8.55977	8.5161	-2.10051	-1.07074	2.10051	down	6.3953e-11	6.74519e-10
3156	HMGCR	3-hydroxy-3-methylglutaryl-CoA reductase	9.5551	9.56205	9.58944	11.3232	11.3856	11.384	3.47112	1.7954	3.47112	up	5.698e-15	1.00028e-12
22821	RASA3	RAS p21 protein activator 3	5.84042	5.90637	6.05581	7.06261	7.08063	7.07901	2.20363	1.13988	2.20363	up	8.64836e-09	4.08249e-08
60487	TRMT11	tRNA methyltransferase 11 homolog	7.85779	7.80694	7.8572	6.69983	6.83516	6.9632	-2.011	-1.00791	2.011	down	1.48015e-08	6.51896e-08
6431	SRSF6	serine/arginine-rich splicing factor 6	9.07455	9.07879	9.13354	7.90862	7.9735	7.91269	-2.24081	-1.16402	2.24081	down	1.94859e-11	2.68306e-10
140459	ASB6	ankyrin repeat and SOCS box containing 6	6.32057	6.48216	6.51502	7.66585	7.55952	7.56135	2.22889	1.15632	2.22889	up	3.63171e-09	1.92142e-08
1457	CSNK2A1	casein kinase 2, alpha 1 polypeptide	9.05287	9.15097	9.16737	10.4755	10.3603	10.3876	2.43522	1.28405	2.43522	up	5.82951e-12	1.06696e-10
84542	KIAA1841	KIAA1841	7.42547	7.47865	7.49266	5.17983	5.02417	5.22544	-5.0018	-2.32245	5.0018	down	4.48015e-12	8.80195e-11
51102	MECR	mitochondrial trans-2-enoyl-CoA reductase	7.51161	7.56142	7.67542	6.10673	6.16099	6.21387	-2.6801	-1.42229	2.6801	down	2.71821e-10	2.19553e-09
5889	RAD51C	RAD51 paralog C	8.33231	8.44274	8.43991	5.66167	5.23478	5.32622	-7.98576	-2.99743	7.98576	down	3.12745e-12	6.73338e-11
254552	NUDT8	nudix hydrolase 8	7.66991	7.65646	7.69999	6.37475	6.19192	6.116	-2.7281	-1.4479	2.7281	down	5.13041e-10	3.69891e-09
8915	BCL10	B-cell CLL/lymphoma 10	6.68237	6.64273	6.58786	7.97454	8.07308	8.11686	2.67062	1.41717	2.67062	up	7.39136e-11	7.57692e-10
90507	SCRN2	secernin 2	8.48989	8.50347	8.71341	7.55435	7.34668	7.39033	-2.20147	-1.13847	2.20147	down	5.14378e-09	2.59426e-08
4515	MTCP1	mature T-cell proliferation 1	7.61234	7.80064	7.73251	5.91527	5.07268	5.39045	-4.77565	-2.2557	4.77565	down	1.60165e-08	6.99071e-08
80336	PABPC1L	poly(A) binding protein, cytoplasmic 1-like	7.80595	8.01738	7.61846	6.49346	6.68249	6.78923	-2.23282	-1.15887	2.23282	down	1.41221e-07	4.8125e-07
8795	TNFRSF10B	tumor necrosis factor receptor superfamily member 10b	6.55537	6.54461	6.63262	8.23112	8.38446	8.31766	3.32544	1.73355	3.32544	up	6.88606e-12	1.21156e-10
6095	RORA	RAR-related orphan receptor A	5.99867	6.07794	5.9292	9.90278	9.98185	10.0008	15.5613	3.95989	15.5613	up	1.94473e-16	1.4073e-13
84726	PRRC2B	proline-rich coiled-coil 2B	7.66405	7.54438	7.70096	8.89363	8.83901	8.79402	2.30658	1.20576	2.30658	up	1.16723e-10	1.09618e-09
9757	KMT2B	lysine (K)-specific methyltransferase 2B	7.08562	6.99871	7.16494	8.64538	8.51113	8.5649	2.81028	1.49071	2.81028	up	3.21991e-11	3.94187e-10
22850	ADNP2	ADNP homeobox 2	9.19106	9.27681	9.23825	10.3637	10.4011	10.448	2.24837	1.16888	2.24837	up	4.06389e-12	8.18963e-11
5994	RFXAP	regulatory factor X associated protein	7.14704	7.16802	7.00545	5.09581	5.63691	5.67212	-3.11354	-1.63856	3.11354	down	6.45436e-08	2.39046e-07
79980	DSN1	DSN1 homolog, MIS12 kinetochore complex component	9.98119	9.88609	9.85977	7.83999	7.715	7.86572	-4.29338	-2.10211	4.29338	down	1.26648e-13	7.10045e-12
343099	CCDC18	coiled-coil domain containing 18	4.80951	4.5681	4.69193	3.51494	3.57911	3.83109	-2.06785	-1.04813	2.06785	down	1.90273e-06	5.17707e-06
11132	CAPN10	calpain 10	6.59591	6.54589	6.40816	7.65211	7.63561	7.61057	2.16762	1.11611	2.16762	up	2.64806e-09	1.46764e-08
347902	AMIGO2	adhesion molecule with Ig-like domain 2	6.94573	6.98609	6.93135	3.85672	4.15503	4.3071	-7.20055	-2.84811	7.20055	down	2.22016e-11	2.97317e-10
65117	RSRC2	arginine/serine-rich coiled-coil 2	9.50001	9.50659	9.61123	10.6046	10.5489	10.6138	2.07029	1.04983	2.07029	up	1.92847e-11	2.66349e-10
63922	CHTF18	chromosome transmission fidelity factor 18	9.24051	9.22796	9.35512	8.08414	7.99443	7.95827	-2.3987	-1.26225	2.3987	down	3.83794e-11	4.52823e-10
85450	ITPRIP	inositol 1,4,5-trisphosphate receptor interacting protein	8.16374	8.01991	8.13525	10.356	10.2708	10.2947	4.59762	2.20089	4.59762	up	2.41754e-14	2.40466e-12
7403	KDM6A	lysine (K)-specific demethylase 6A	7.4202	7.28915	7.38968	9.0844	9.14055	9.21002	3.43104	1.77865	3.43104	up	1.25213e-12	3.45271e-11
374659	HDDC3	HD domain containing 3	7.83774	7.85088	7.86482	5.83796	5.7367	5.65905	-4.30668	-2.10658	4.30668	down	3.03455e-12	6.58784e-11
7532	YWHAG	tyrosine 3-monooxygenase/tryptophan 5-monooxygenase activation protein, gamma	6.15181	6.05025	6.25301	7.49696	7.54824	7.51912	2.58426	1.36975	2.58426	up	5.0576e-10	3.65789e-09
50862	RNF141	ring finger protein 141	7.50434	7.58443	7.57586	6.18094	6.32184	6.26425	-2.46092	-1.2992	2.46092	down	4.67197e-10	3.42058e-09
10882	C1QL1	complement component 1, q subcomponent-like 1	7.73339	7.72821	7.78433	6.69697	6.43751	6.36973	-2.37387	-1.24724	2.37387	down	7.27619e-09	3.51287e-08
83451	ABHD11	abhydrolase domain containing 11	8.21124	8.14423	8.35295	6.80178	6.74962	6.59279	-2.87071	-1.52141	2.87071	down	2.28773e-10	1.90736e-09
9493	KIF23	kinesin family member 23	9.42927	9.35959	9.45551	6.60264	6.74677	6.78367	-6.51499	-2.70376	6.51499	down	2.58389e-14	2.48768e-12
25841	ABTB2	ankyrin repeat and BTB (POZ) domain containing 2	7.00279	6.96596	7.07617	9.20057	9.15722	9.10216	4.40256	2.13834	4.40256	up	1.03631e-13	6.20151e-12
9481	SLC25A27	solute carrier family 25, member 27	5.97504	6.09383	6.14287	4.87113	5.1924	4.91934	-2.10861	-1.07629	2.10861	down	4.16269e-07	1.28043e-06
10855	HPSE	heparanase	6.30258	6.40545	6.5714	5.58058	5.12661	5.46297	-2.05114	-1.03642	2.05114	down	2.41306e-06	6.43696e-06
2130	EWSR1	EWS RNA binding protein 1	5.33669	5.16916	5.76205	7.50064	7.59757	7.54253	4.35985	2.12428	4.35985	up	1.78881e-09	1.05321e-08
85026	ARRDC1-AS1	ARRDC1 antisense RNA 1	7.8126	7.80063	7.88466	6.59072	6.67362	6.38567	-2.43282	-1.28263	2.43282	down	2.5269e-09	1.41203e-08
404672	GTF2H5	general transcription factor IIH subunit 5	10.3876	10.4147	10.2974	8.88343	8.97209	8.99002	-2.67227	-1.41806	2.67227	down	1.82338e-12	4.52138e-11
389524	GTF2IRD2B	GTF2I repeat domain containing 2B	6.5099	6.60094	6.60198	5.4665	5.49525	5.49968	-2.11961	-1.0838	2.11961	down	1.47678e-08	6.50745e-08
441061	MARCH11	membrane associated ring-CH-type finger 11	7.34702	7.27435	7.40874	4.74826	4.64714	4.49774	-6.55376	-2.71232	6.55376	down	2.76287e-12	6.12739e-11
55260	TMEM143	transmembrane protein 143	8.09153	7.85465	7.57244	6.33952	6.79069	6.92155	-2.2278	-1.15562	2.2278	down	6.27373e-06	1.55666e-05
728162	ST13P11	suppression of tumorigenicity 13 (colon carcinoma) (Hsp70 interacting protein) pseudogene 11	9.43724	9.21386	9.11225	10.0428	10.4253	10.4857	2.08995	1.06347	2.08995	up	4.7099e-07	1.4334e-06
26084	ARHGEF26	Rho guanine nucleotide exchange factor 26	6.41089	6.43426	6.32494	4.30977	3.83	3.67747	-5.46776	-2.45095	5.46776	down	1.57514e-09	9.46512e-09
219844	HYLS1	hydrolethalus syndrome 1	8.93153	8.92597	8.79834	7.30981	7.58584	7.50167	-2.67494	-1.41951	2.67494	down	2.92042e-10	2.32568e-09
4939	OAS2	2'-5'-oligoadenylate synthetase 2	6.58484	6.37812	6.42557	4.58664	4.43526	4.27859	-4.0822	-2.02935	4.0822	down	4.10993e-10	3.07552e-09
3516	RBPJ	recombination signal binding protein for immunoglobulin kappa J region	6.07549	5.8695	6.14104	7.25211	7.0418	6.96586	2.08192	1.05791	2.08192	up	2.06556e-07	6.78342e-07
4193	MDM2	MDM2 proto-oncogene, E3 ubiquitin protein ligase	5.67141	5.71705	5.63793	6.67138	6.80874	6.7578	2.10018	1.07051	2.10018	up	1.6481e-08	7.16702e-08
54843	SYTL2	synaptotagmin like 2	8.65025	8.48586	8.49759	6.62069	6.58399	6.61065	-3.83561	-1.93946	3.83561	down	1.62621e-12	4.15885e-11
85444	LRRCC1	leucine rich repeat and coiled-coil centrosomal protein 1	6.07363	6.1608	6.10009	4.4013	4.32997	4.32823	-3.38309	-1.75834	3.38309	down	2.92869e-10	2.33084e-09
2319	FLOT2	flotillin 2	6.77896	6.87643	7.12825	4.95442	4.85413	4.95365	-4.01986	-2.00715	4.01986	down	2.74462e-10	2.2132e-09
11010	GLIPR1	GLI pathogenesis-related 1	10.7183	10.6746	10.5685	9.32404	9.34457	9.43487	-2.43849	-1.28599	2.43849	down	8.51493e-12	1.43052e-10
134218	DNAJC21	DnaJ heat shock protein family (Hsp40) member C21	8.1203	8.18041	8.14726	9.12402	9.3006	9.24466	2.10493	1.07377	2.10493	up	2.204e-10	1.84542e-09
51501	C11orf73	chromosome 11 open reading frame 73	10.2273	10.1796	10.1938	8.81427	8.82324	8.95695	-2.52351	-1.33543	2.52351	down	4.03768e-12	8.15367e-11
121551	BTBD11	BTB (POZ) domain containing 11	5.72066	5.77777	5.97018	7.616	7.56978	7.48668	3.32791	1.73462	3.32791	up	1.47228e-10	1.32349e-09
23306	NEMP1	nuclear envelope integral membrane protein 1	8.83735	8.82602	8.82083	7.5681	7.65691	7.65691	-2.29861	-1.20076	2.29861	down	2.64093e-11	3.39472e-10
256471	MFSD8	major facilitator superfamily domain containing 8	7.0601	6.86372	7.0171	5.20602	5.54126	5.47239	-2.97677	-1.57375	2.97677	down	4.353e-09	2.24676e-08
3489	IGFBP6	insulin like growth factor binding protein 6	8.72285	8.62037	8.72315	7.20836	7.30768	7.36283	-2.63141	-1.39583	2.63141	down	3.67627e-11	4.37893e-10
195828	ZNF367	zinc finger protein 367	7.75408	7.66522	7.63084	4.86765	5.26638	5.22613	-5.91069	-2.56333	5.91069	down	2.75662e-11	3.50538e-10
64222	TOR3A	torsin family 3, member A	8.59413	8.59357	8.546	5.75086	6.14909	6.03503	-6.06107	-2.59957	6.06107	down	4.57908e-12	8.95131e-11
51755	CDK12	cyclin-dependent kinase 12	6.23748	6.32914	6.39872	7.97786	7.9688	7.88343	3.07713	1.62158	3.07713	up	3.29913e-11	4.01294e-10
55038	CDCA4	cell division cycle associated 4	6.11072	6.24188	6.24188	5.23089	5.05258	4.93653	-2.18075	-1.12483	2.18075	down	1.32174e-07	4.52987e-07
4747	NEFL	neurofilament, light polypeptide	6.15679	6.28081	6.14843	4.50837	4.8756	4.8483	-2.73446	-1.45125	2.73446	down	3.09323e-08	1.25064e-07
55266	TMEM19	transmembrane protein 19	8.60222	8.66676	8.53119	6.81361	7.05835	7.02056	-3.10778	-1.63588	3.10778	down	5.75374e-11	6.21961e-10
105369237	LOC105369237	sperm protein associated with the nucleus on the X chromosome B/F	10.1823	9.96146	9.93008	8.51676	8.60002	8.62323	-2.72192	-1.44463	2.72192	down	5.77412e-11	6.23474e-10
22974	TPX2	TPX2, microtubule-associated	10.5759	10.4529	10.5127	9.00106	8.92311	8.95352	-2.93754	-1.55461	2.93754	down	3.33374e-13	1.39031e-11
100996763	LOC100996763	notch homolog 2 N-terminal-like protein	9.74999	9.73652	9.82205	11.0931	10.9846	11.0119	2.39552	1.26034	2.39552	up	1.94704e-12	4.71278e-11
81029	WNT5B	wingless-type MMTV integration site family member 5B	10.9177	10.944	10.9698	9.57969	9.52967	9.49718	-2.65427	-1.40831	2.65427	down	1.77719e-13	8.85808e-12
27106	ARRDC2	arrestin domain containing 2	6.56772	6.53391	6.6575	8.25002	8.14672	8.16057	3.03016	1.59939	3.03016	up	1.63825e-11	2.34756e-10
79724	ZNF768	zinc finger protein 768	6.86985	6.7728	6.95533	7.92219	7.84375	7.88303	2.0237	1.017	2.0237	up	4.0656e-09	2.11603e-08
28514	DLL1	delta-like 1 (Drosophila)	4.87286	4.88119	4.91203	6.06357	5.85308	5.81578	2.0309	1.02212	2.0309	up	2.60246e-07	8.36732e-07
27314	RAB30	RAB30, member RAS oncogene family	7.10784	7.05806	7.127	5.34432	5.41136	5.36158	-3.30629	-1.72521	3.30629	down	5.02994e-11	5.58236e-10
79828	METTL8	methyltransferase like 8	8.55273	8.57763	8.57084	7.45414	7.56393	7.56429	-2.05568	-1.03961	2.05568	down	2.83245e-10	2.27043e-09
594	BCKDHB	branched chain keto acid dehydrogenase E1, beta polypeptide	7.42517	7.4532	7.52702	5.30923	5.17015	5.20516	-4.7249	-2.24028	4.7249	down	3.86747e-12	7.90012e-11
5192	PEX10	peroxisomal biogenesis factor 10	7.59486	7.50078	7.59356	6.21812	6.40643	6.27181	-2.40207	-1.26428	2.40207	down	1.21449e-09	7.57284e-09
85014	TMEM141	transmembrane protein 141	8.41892	8.56505	8.6627	6.62354	6.69504	6.69103	-3.67825	-1.87902	3.67825	down	7.53968e-12	1.30251e-10
8277	TKTL1	transketolase-like 1	5.89372	5.99965	5.72598	3.96066	3.66207	4.11104	-3.89564	-1.96186	3.89564	down	5.12984e-09	2.5879e-08
8076	MFAP5	microfibrillar associated protein 5	8.58955	8.65612	8.55313	6.85863	6.94343	6.95338	-3.20677	-1.68112	3.20677	down	3.00224e-12	6.52591e-11
353511	PKD1P6	polycystic kidney disease 1 (autosomal dominant) pseudogene 6	6.56125	6.67228	6.6949	8.26408	8.25865	8.2081	3.03311	1.6008	3.03311	up	1.17136e-11	1.828e-10
113655	MFSD3	major facilitator superfamily domain containing 3	6.92008	6.84884	7.13435	5.49525	4.92564	4.84196	-3.68111	-1.88014	3.68111	down	5.19778e-08	1.97562e-07
221336	BEND6	BEN domain containing 6	5.81482	5.85288	5.93294	4.22452	4.35224	4.21521	-3.03751	-1.60289	3.03751	down	1.59686e-09	9.57797e-09
53840	TRIM34	tripartite motif containing 34	6.0199	5.91206	5.94017	3.94103	4.52531	4.18238	-3.34298	-1.74114	3.34298	down	3.2754e-08	1.3141e-07
5673	PSG5	pregnancy specific beta-1-glycoprotein 5	5.65674	5.86721	5.49131	4.5731	4.71564	4.53714	-2.08945	-1.06313	2.08945	down	9.47981e-07	2.72284e-06
84674	CARD6	caspase recruitment domain family member 6	6.66096	6.71296	6.85302	8.25741	8.36544	8.42411	3.04549	1.60667	3.04549	up	5.13677e-11	5.68317e-10
56605	ERO1B	endoplasmic reticulum oxidoreductase beta	4.16703	4.61873	4.60145	7.19046	7.44589	7.45581	7.47281	2.90165	7.47281	up	6.25659e-11	6.63651e-10
100131211	NEMP2	nuclear envelope integral membrane protein 2	5.97121	6.25687	6.27655	4.86441	4.96173	4.88462	-2.40264	-1.26462	2.40264	down	5.45065e-08	2.06031e-07
79798	ARMC5	armadillo repeat containing 5	6.10803	5.90537	6.21235	8.13423	8.11416	8.12511	4.13891	2.04925	4.13891	up	1.59434e-11	2.29982e-10
23468	CBX5	chromobox 5	9.24587	9.2284	9.22627	6.24697	6.62467	6.48251	-6.87867	-2.78213	6.87867	down	6.76085e-13	2.23514e-11
23175	LPIN1	lipin 1	8.13405	8.02139	8.1124	9.25234	9.27231	9.23033	2.23826	1.16238	2.23826	up	2.44315e-11	3.20911e-10
84938	ATG4C	autophagy related 4C, cysteine peptidase	7.19057	7.08075	6.98795	4.6622	5.3301	4.68312	-4.57768	-2.19462	4.57768	down	1.16722e-08	5.29443e-08
23174	ZCCHC14	zinc finger, CCHC domain containing 14	9.39729	9.39173	9.41614	10.511	10.5593	10.5836	2.21846	1.14956	2.21846	up	1.58515e-12	4.08863e-11
375444	C5orf34	chromosome 5 open reading frame 34	8.0294	7.95087	8.0611	6.49717	6.52539	6.53706	-2.81653	-1.49392	2.81653	down	2.48599e-11	3.24357e-10
6780	STAU1	staufen double-stranded RNA binding protein 1	8.71402	8.81635	8.94799	9.86513	9.87854	9.84938	2.05371	1.03823	2.05371	up	4.96785e-10	3.60031e-09
23507	LRRC8B	leucine-rich repeat containing 8 family member B	6.50635	6.42799	6.51974	5.39121	5.651	5.38474	-2.01258	-1.00904	2.01258	down	2.3275e-07	7.56417e-07
983	CDK1	cyclin-dependent kinase 1	10.0098	9.95326	9.9244	6.53039	6.73567	6.75494	-9.77319	-3.28883	9.77319	down	5.37387e-15	9.67717e-13
5983	RFC3	replication factor C subunit 3	8.36822	8.3816	8.4872	6.5789	6.54589	6.43354	-3.7138	-1.8929	3.7138	down	3.29327e-12	7.0055e-11
374969	SVBP	small vasohibin binding protein	8.23159	8.0962	8.05131	7.02169	6.8762	6.95064	-2.26084	-1.17686	2.26084	down	1.12576e-09	7.10797e-09
7151	TOP1P1	topoisomerase (DNA) I pseudogene 1	7.7615	7.56466	7.64579	8.68784	8.80102	8.81101	2.15742	1.10931	2.15742	up	8.37708e-10	5.57288e-09
83729	INHBE	inhibin beta E	6.78915	6.83115	6.79857	4.27196	4.98585	4.69092	-4.45898	-2.15671	4.45898	down	7.97194e-09	3.80971e-08
57724	EPG5	ectopic P-granules autophagy protein 5 homolog (C. elegans)	9.50601	9.5218	9.4738	8.19251	8.08826	8.02898	-2.63406	-1.39729	2.63406	down	6.53616e-12	1.16468e-10
2879	GPX4	glutathione peroxidase 4	11.837	11.8279	11.9392	10.4851	10.4576	10.4796	-2.62794	-1.39393	2.62794	down	2.0033e-13	9.65264e-12
6605	SMARCE1	SWI/SNF related, matrix associated, actin dependent regulator of chromatin, subfamily e, member 1	5.0137	4.95738	4.87255	6.11593	6.30503	6.60155	2.62617	1.39296	2.62617	up	9.48647e-08	3.36941e-07
4637	MYL6	myosin light chain 6	6.92025	6.67981	6.83863	5.59451	5.70944	5.9804	-2.07261	-1.05145	2.07261	down	6.01197e-07	1.7939e-06
5696	PSMB8	proteasome subunit beta 8	9.0474	8.88804	8.815	7.40406	7.26202	7.44638	-2.92005	-1.54599	2.92005	down	8.63426e-11	8.58553e-10
54812	AFTPH	aftiphilin	6.59177	6.61103	6.58536	7.65076	7.85369	7.94113	2.32808	1.21914	2.32808	up	3.62662e-09	1.91927e-08
63929	XPNPEP3	X-prolyl aminopeptidase 3, mitochondrial	4.3675	4.10299	4.16901	5.6118	5.95346	5.8071	2.98477	1.57762	2.98477	up	1.93371e-08	8.2484e-08
55638	SYBU	syntabulin (syntaxin-interacting)	8.19818	8.38774	8.27902	6.28441	5.95031	5.86513	-4.77344	-2.25503	4.77344	down	7.73255e-11	7.85299e-10
27031	NPHP3	nephronophthisis 3 (adolescent)	4.64108	4.88018	4.81432	5.93899	5.9844	5.82592	2.20062	1.13791	2.20062	up	1.12503e-07	3.92071e-07
3988	LIPA	lipase A, lysosomal acid, cholesterol esterase	9.53532	9.55152	9.5782	8.42515	8.43269	8.35492	-2.22031	-1.15076	2.22031	down	9.34746e-12	1.53604e-10
140462	ASB9	ankyrin repeat and SOCS box containing 9	6.5115	6.21379	6.06277	4.21245	4.04363	4.27064	-4.24897	-2.08711	4.24897	down	1.68387e-09	9.99858e-09
23219	FBXO28	F-box protein 28	8.05473	8.12649	8.1527	9.70426	9.81683	9.81415	3.17577	1.66711	3.17577	up	5.92085e-13	2.04751e-11
831	CAST	calpastatin	3.95577	3.67253	3.87549	5.36736	5.15323	5.42562	2.79105	1.48081	2.79105	up	3.84461e-08	1.51249e-07
8637	EIF4EBP3	eukaryotic translation initiation factor 4E binding protein 3	6.73758	6.77973	6.7388	7.71717	7.73927	7.8136	2.00645	1.00464	2.00645	up	1.98432e-09	1.152e-08
2953	GSTT2	glutathione S-transferase theta 2 (gene/pseudogene)	7.39024	7.41624	7.4815	6.28344	6.32597	6.31328	-2.17613	-1.12176	2.17613	down	1.39963e-09	8.55787e-09
51257	MARCH2	membrane associated ring-CH-type finger 2	7.12288	7.18032	7.15745	5.68323	5.91586	5.91921	-2.4865	-1.31412	2.4865	down	3.62115e-09	1.91714e-08
54877	ZCCHC2	zinc finger, CCHC domain containing 2	6.20051	6.09169	6.19142	8.07736	8.07986	7.92838	3.64856	1.86733	3.64856	up	9.47608e-12	1.55326e-10
79647	AKIRIN1	akirin 1	8.7539	8.738	8.81422	10.2003	10.2727	10.3066	2.81114	1.49115	2.81114	up	5.21468e-13	1.87637e-11
102659353	THRIL	TNF and HNRNPL related immunoregulatory long non-coding RNA	6.75297	6.35722	6.51736	4.92118	4.65383	4.82754	-3.34421	-1.74167	3.34421	down	5.97603e-09	2.95826e-08
27166	PRELID1	PRELI domain containing 1	11.9093	11.9033	11.8804	10.8608	10.8966	10.8985	-2.01715	-1.01232	2.01715	down	9.16832e-13	2.76017e-11
55626	AMBRA1	autophagy/beclin-1 regulator 1	6.91615	6.84461	7.1457	8.10993	8.16506	8.02962	2.19271	1.13272	2.19271	up	1.09138e-08	4.99155e-08
6595	SMARCA2	SWI/SNF related, matrix associated, actin dependent regulator of chromatin, subfamily a, member 2	7.4581	7.33692	7.34403	6.02092	6.29342	6.27833	-2.26911	-1.18213	2.26911	down	1.63241e-08	7.10352e-08
8794	TNFRSF10C	tumor necrosis factor receptor superfamily member 10c, decoy without an intracellular domain	7.22611	7.07159	7.13264	6.03732	5.87182	5.90776	-2.30454	-1.20448	2.30454	down	5.07547e-09	2.56345e-08
84816	RTN4IP1	reticulon 4 interacting protein 1	7.84822	7.92344	7.91674	6.18024	6.34773	6.37222	-3.02319	-1.59607	3.02319	down	6.76192e-11	7.04816e-10
2970	GTF2IP1	general transcription factor IIi pseudogene 1	8.50092	8.45292	8.52699	7.33339	7.41292	7.48065	-2.12082	-1.08462	2.12082	down	3.83353e-10	2.90597e-09
80765	STARD5	StAR related lipid transfer domain containing 5	5.76239	5.56966	5.68936	4.36556	4.39922	4.20132	-2.55225	-1.35177	2.55225	down	2.3588e-08	9.83919e-08
8038	ADAM12	ADAM metallopeptidase domain 12	6.23897	6.20493	6.42577	4.30033	4.73833	4.649	-3.31116	-1.72734	3.31116	down	1.24325e-08	5.58804e-08
57007	ACKR3	atypical chemokine receptor 3	7.3619	7.54096	7.81267	5.63592	5.92138	5.88361	-3.38277	-1.75821	3.38277	down	4.96344e-09	2.51597e-08
25909	AHCTF1	AT-hook containing transcription factor 1	7.59493	7.50204	7.56778	8.64851	8.8037	8.86551	2.32569	1.21766	2.32569	up	3.32878e-10	2.59431e-09
401251	SAPCD1	suppressor APC domain containing 1	7.30689	7.55735	7.3144	5.26642	5.44502	5.43979	-4.02541	-2.00914	4.02541	down	1.00377e-10	9.70445e-10
653513	LOC653513	phosphodiesterase 4D interacting protein-like	6.81435	6.69744	6.78622	8.20022	8.19139	8.26342	2.73652	1.45234	2.73652	up	2.72392e-11	3.47511e-10
79974	CPED1	cadherin-like and PC-esterase domain containing 1	9.83666	9.77695	9.76722	7.06187	7.02351	7.00922	-6.78372	-2.76208	6.78372	down	1.16358e-15	3.96646e-13
25953	PNKD	paroxysmal nonkinesigenic dyskinesia	9.34108	9.31009	9.4368	7.636	7.49339	7.51886	-3.51431	-1.81324	3.51431	down	1.03041e-12	3.00938e-11
89891	WDR34	WD repeat domain 34	8.82979	8.87798	8.96769	6.31481	6.06407	6.23941	-6.43403	-2.68572	6.43403	down	2.68594e-13	1.17799e-11
23086	EXPH5	exophilin 5	7.07077	7.00156	7.14569	5.54706	5.51809	5.15331	-3.17448	-1.66652	3.17448	down	4.31101e-09	2.22773e-08
11070	TMEM115	transmembrane protein 115	8.59423	8.57111	8.65961	9.58439	9.64712	9.61189	2.00854	1.00615	2.00854	up	4.58965e-11	5.18952e-10
201161	CENPV	centromere protein V	8.85592	8.72316	8.93209	7.89739	7.74263	7.77484	-2.045	-1.0321	2.045	down	2.85582e-09	1.56342e-08
114335	CGB1	chorionic gonadotropin, beta polypeptide 1	8.4116	8.31551	8.31904	7.23925	7.34161	7.40746	-2.0269	-1.01928	2.0269	down	1.76636e-09	1.04234e-08
51643	TMBIM4	transmembrane BAX inhibitor motif containing 4	10.4646	10.4832	10.5393	9.20945	9.14029	9.13962	-2.51853	-1.33258	2.51853	down	7.34721e-13	2.36598e-11
641746	LOC641746	glycine cleavage system protein H (aminomethyl carrier) pseudogene	10.6019	10.7054	10.603	9.55804	9.62177	9.59451	-2.06382	-1.04532	2.06382	down	1.54478e-11	2.24741e-10
6801	STRN	striatin	6.05554	5.93314	6.08962	7.25363	7.58966	7.63808	2.76579	1.46769	2.76579	up	8.41866e-09	3.99485e-08
6182	MRPL12	mitochondrial ribosomal protein L12	9.49044	9.50667	9.51891	7.82391	7.83263	7.89555	-3.14845	-1.65464	3.14845	down	2.10396e-13	1.0002e-11
161742	SPRED1	sprouty-related, EVH1 domain containing 1	7.49235	7.36632	7.36284	8.92975	9.14982	9.2259	3.23699	1.69465	3.23699	up	5.66458e-11	6.14533e-10
79879	CCDC134	coiled-coil domain containing 134	6.22549	6.17527	6.60184	4.98488	4.89613	5.05291	-2.56015	-1.35623	2.56015	down	1.0239e-07	3.60492e-07
286499	FAM133A	family with sequence similarity 133 member A	10.2711	10.2489	10.309	8.70622	8.81599	8.76557	-2.85547	-1.51373	2.85547	down	3.47548e-13	1.42739e-11
8975	USP13	ubiquitin specific peptidase 13 (isopeptidase T-3)	8.3496	8.26979	8.25468	6.98918	6.98809	6.94963	-2.48927	-1.31572	2.48927	down	3.89474e-11	4.57553e-10
2200	FBN1	fibrillin 1	6.31458	6.31068	6.384	5.21638	5.16857	5.06647	-2.27513	-1.18595	2.27513	down	1.43864e-08	6.35661e-08
8372	HYAL3	hyaluronoglucosaminidase 3	4.74933	5.16266	4.68749	5.9757	6.003	6.01067	2.18853	1.12996	2.18853	up	1.09183e-06	3.10226e-06
3159	HMGA1	high mobility group AT-hook 1	9.41379	9.28143	9.34559	10.5909	10.5833	10.6239	2.38243	1.25244	2.38243	up	2.55837e-12	5.77882e-11
1018	CDK3	cyclin-dependent kinase 3	4.97455	5.08895	5.29605	6.36371	6.32676	6.22658	2.27495	1.18583	2.27495	up	8.76248e-08	3.13822e-07
51123	ZNF706	zinc finger protein 706	7.36721	7.33203	7.35479	6.11728	5.88387	5.92394	-2.59604	-1.37631	2.59604	down	1.17555e-09	7.37472e-09
26033	ATRNL1	attractin like 1	6.96671	6.89232	6.74196	4.45392	4.87672	4.65458	-4.61157	-2.20526	4.61157	down	3.97046e-10	2.99005e-09
284106	CISD3	CDGSH iron sulfur domain 3	9.69971	9.70345	9.84822	8.13944	7.76112	7.90826	-3.51661	-1.81419	3.51661	down	8.54156e-11	8.51911e-10
201973	PRIMPOL	primase and DNA directed polymerase	8.59476	8.53123	8.55689	6.87883	6.83194	6.84015	-3.27309	-1.71065	3.27309	down	1.20323e-12	3.3534e-11
729852	UMAD1	UBAP1-MVB12-associated (UMA) domain containing 1	6.09267	5.69743	5.83967	4.82068	4.56781	4.49774	-2.37487	-1.24785	2.37487	down	4.77729e-07	1.4512e-06
9518	GDF15	growth differentiation factor 15	7.84777	7.73201	7.94332	9.32409	9.19894	9.30636	2.70463	1.43543	2.70463	up	3.89559e-11	4.57553e-10
643136	ZC3H11B	zinc finger CCCH-type containing 11B pseudogene	7.23772	7.15605	7.20651	8.28141	8.25915	8.35055	2.13901	1.09694	2.13901	up	2.78005e-10	2.23485e-09
9590	AKAP12	A-kinase anchoring protein 12	8.78991	8.79353	8.83438	7.53966	7.56621	7.53712	-2.3921	-1.25828	2.3921	down	1.02871e-11	1.64885e-10
10951	CBX1	chromobox 1	10.9863	10.9819	10.9456	9.60258	9.72139	9.74534	-2.43087	-1.28147	2.43087	down	2.53553e-12	5.73384e-11
84316	NAA38	N(alpha)-acetyltransferase 38, NatC auxiliary subunit	10.9914	10.9449	11.0158	9.12869	8.95788	8.97822	-3.89725	-1.96246	3.89725	down	8.30176e-14	5.35327e-12
9887	SMG7	SMG7 nonsense mediated mRNA decay factor	6.08342	5.99727	6.17864	7.13797	7.13034	7.09112	2.0468	1.03337	2.0468	up	1.42457e-08	6.29941e-08
102724200	LOC102724200	trafficking protein particle complex subunit 10-like	5.78678	5.65019	5.65043	6.95224	6.82245	6.75837	2.21691	1.14855	2.21691	up	1.74239e-08	7.52762e-08
84250	SLF1	SMC5-SMC6 complex localization factor 1	7.23472	7.05523	7.13543	5.6847	5.74416	5.79273	-2.64133	-1.40126	2.64133	down	8.74174e-10	5.76931e-09
10512	SEMA3C	sema domain, immunoglobulin domain (Ig), short basic domain, secreted, (semaphorin) 3C	8.58697	8.63922	8.66224	6.52056	6.71089	6.80185	-3.86833	-1.95171	3.86833	down	9.46062e-12	1.55203e-10
29082	CHMP4A	charged multivesicular body protein 4A	10.5332	10.4695	10.527	9.42706	9.51062	9.4711	-2.05665	-1.04029	2.05665	down	9.56268e-12	1.56091e-10
7564	ZNF16	zinc finger protein 16	6.46939	6.56737	6.70646	8.11514	8.13126	8.05464	2.86647	1.51927	2.86647	up	1.15077e-10	1.08328e-09
3482	IGF2R	insulin like growth factor 2 receptor	8.68464	8.6035	8.71543	10.0489	9.98922	10.0684	2.58052	1.36766	2.58052	up	2.01141e-12	4.82508e-11
63915	BLOC1S5	biogenesis of lysosomal organelles complex-1, subunit 5, muted	6.66704	6.70263	6.83534	5.22421	5.49484	5.55668	-2.479	-1.30976	2.479	down	3.09647e-08	1.25156e-07
58515	SELK	selenoprotein K	10.7964	10.7583	10.7392	11.8717	11.8822	12.0094	2.22912	1.15648	2.22912	up	4.9899e-12	9.56773e-11
6717	SRI	sorcin	8.23297	8.2786	8.37554	6.06151	6.39595	6.31961	-4.103	-2.03668	4.103	down	4.07441e-11	4.73715e-10
548313	SSX4B	synovial sarcoma, X breakpoint 4B	8.94079	8.90958	8.98261	7.14693	7.3817	7.1466	-3.29265	-1.71925	3.29265	down	1.65666e-11	2.36873e-10
6150	MRPL23	mitochondrial ribosomal protein L23	10.8419	10.8777	10.9588	9.41267	9.23546	9.25573	-3.0136	-1.59149	3.0136	down	1.89636e-12	4.6344e-11
23060	ZNF609	zinc finger protein 609	5.68297	5.78069	5.83376	7.1735	7.11125	7.16638	2.61094	1.38457	2.61094	up	6.16983e-10	4.3084e-09
84622	ZNF594	zinc finger protein 594	6.47398	6.60476	6.55488	4.90261	4.89966	5.12819	-2.96436	-1.56772	2.96436	down	2.00172e-09	1.16055e-08
9337	CNOT8	CCR4-NOT transcription complex subunit 8	7.70086	7.75969	7.73841	8.93129	9.03682	8.99292	2.38506	1.25402	2.38506	up	1.64062e-11	2.34923e-10
6234	RPS28	ribosomal protein S28	6.25301	6.13822	6.25315	7.63103	7.75222	7.74436	2.81749	1.49441	2.81749	up	1.14266e-10	1.0775e-09
8218	CLTCL1	clathrin, heavy chain-like 1	6.666	7.04187	6.92325	4.79005	5.5152	5.05023	-3.38357	-1.75855	3.38357	down	1.95423e-07	6.44316e-07
7057	THBS1	thrombospondin 1	11.893	11.8544	11.6941	9.48762	9.68718	9.76201	-4.49475	-2.16824	4.49475	down	1.36356e-12	3.6722e-11
55341	LSG1	large 60S subunit nuclear export GTPase 1	7.75334	7.53248	7.63936	8.88906	9.00366	9.02962	2.51819	1.33239	2.51819	up	1.67214e-10	1.472e-09
340719	NANOS1	nanos homolog 1 (Drosophila)	4.85614	5.13118	5.27197	3.50692	3.77082	4.07848	-2.46404	-1.30102	2.46404	down	2.75429e-06	7.27668e-06
24142	NAT6	N-acetyltransferase 6 (GCN5-related)	6.09632	5.91415	6.15477	4.98025	4.83143	4.77554	-2.28576	-1.19267	2.28576	down	8.25775e-08	2.97747e-07
7291	TWIST1	twist family bHLH transcription factor 1	8.23003	8.13298	8.10024	6.46318	6.49762	6.56676	-3.12798	-1.64523	3.12798	down	1.36346e-11	2.05715e-10
81617	CAB39L	calcium binding protein 39 like	5.2019	5.13567	4.86324	6.5338	6.42811	6.40536	2.61864	1.38882	2.61864	up	2.08632e-08	8.82233e-08
91304	TMEM259	transmembrane protein 259	5.94174	6.06076	5.73935	6.89539	6.98181	6.88781	2.01073	1.00772	2.01073	up	1.67084e-07	5.59288e-07
114990	VASN	vasorin	8.52067	8.5276	8.59667	9.81873	9.78955	9.78033	2.37494	1.24789	2.37494	up	2.58909e-12	5.84145e-11
55095	SAMD4B	sterile alpha motif domain containing 4B	8.11563	8.14645	8.1262	9.16647	9.19145	9.129	2.0461	1.03288	2.0461	up	3.96191e-11	4.63532e-10
10254	STAM2	signal transducing adaptor molecule 2	6.68111	6.54789	6.72634	8.1497	8.05099	8.07519	2.71355	1.44018	2.71355	up	1.04402e-10	1.00165e-09
2152	F3	coagulation factor III (thromboplastin, tissue factor)	7.93626	7.75846	7.85047	5.17827	5.80998	5.62263	-4.96377	-2.31144	4.96377	down	1.19455e-09	7.46633e-09
2175	FANCA	Fanconi anemia complementation group A	8.52325	8.52149	8.64574	7.55745	7.54141	7.37951	-2.10046	-1.0707	2.10046	down	1.67003e-09	9.93604e-09
5445	PON2	paraoxonase 2	11.0191	11.0055	11.0146	9.94185	9.88943	9.98456	-2.10594	-1.07446	2.10594	down	2.8962e-12	6.36528e-11
4716	NDUFB10	NADH:ubiquinone oxidoreductase subunit B10	10.5332	10.5712	10.6297	9.33632	9.28537	9.2965	-2.41487	-1.27194	2.41487	down	1.07638e-12	3.10689e-11
333	APLP1	amyloid beta (A4) precursor-like protein 1	8.26337	8.10993	8.20832	6.64051	6.66908	6.83446	-2.78792	-1.47919	2.78792	down	1.504e-10	1.3452e-09
2271	FH	fumarate hydratase	10.3419	10.2971	10.3835	9.32207	9.2578	9.19198	-2.11919	-1.08351	2.11919	down	2.466e-11	3.22742e-10
10714	POLD3	polymerase (DNA-directed), delta 3, accessory subunit	8.04248	8.07966	8.042	6.10384	6.35824	6.3061	-3.47895	-1.79865	3.47895	down	3.30056e-11	4.01294e-10
25962	KIAA1429	KIAA1429	7.86012	7.85385	7.84603	8.79731	8.93313	8.89955	2.03261	1.02333	2.03261	up	2.29966e-10	1.91548e-09
5727	PTCH1	patched 1	7.0458	6.90273	7.13108	4.84165	5.42137	5.41066	-3.48698	-1.80198	3.48698	down	3.7122e-08	1.46719e-07
1385	CREB1	cAMP responsive element binding protein 1	7.84253	7.87171	7.80942	6.48644	6.60066	6.56645	-2.44534	-1.29004	2.44534	down	1.75558e-10	1.52907e-09
23463	ICMT	isoprenylcysteine carboxyl methyltransferase	9.79728	9.878	9.96171	8.23668	8.25154	8.25274	-3.09945	-1.63201	3.09945	down	6.74604e-13	2.23213e-11
3189	HNRNPH3	heterogeneous nuclear ribonucleoprotein H3 (2H9)	10.3238	10.3235	10.2454	9.17336	9.2036	9.21697	-2.14291	-1.09957	2.14291	down	5.61589e-12	1.03964e-10
441430	ANKRD20A2	ankyrin repeat domain 20 family member A2	9.48567	9.59572	9.51393	7.86184	8.10755	8.12189	-2.83107	-1.50135	2.83107	down	7.99419e-11	8.07207e-10
23327	NEDD4L	neural precursor cell expressed, developmentally down-regulated 4-like, E3 ubiquitin protein ligase	8.07946	8.00783	8.05979	9.1946	9.16391	9.23402	2.21681	1.14848	2.21681	up	1.96816e-11	2.70523e-10
3669	ISG20	interferon stimulated exonuclease gene 20kDa	5.10814	5.10052	5.36158	7.17149	6.88592	6.84801	3.43044	1.77839	3.43044	up	2.49639e-09	1.39719e-08
401387	LRRD1	leucine-rich repeats and death domain containing 1	10.5197	10.4434	10.4812	12.0437	12.0641	12.0518	2.97274	1.57179	2.97274	up	1.20438e-14	1.65902e-12
145389	SLC38A6	solute carrier family 38, member 6	7.90849	8.02424	8.05933	6.85717	6.94335	6.9803	-2.10003	-1.07041	2.10003	down	2.05896e-09	1.19003e-08
55777	MBD5	methyl-CpG binding domain protein 5	3.30505	3.74511	3.88375	4.59315	4.74545	4.85235	2.12238	1.08568	2.12238	up	1.12086e-05	2.661e-05
29980	DONSON	downstream neighbor of SON	8.78008	8.61106	8.61317	7.51598	7.76145	7.62963	-2.04545	-1.03242	2.04545	down	8.73728e-09	4.11804e-08
113263	GLCCI1	glucocorticoid induced 1	5.41877	5.29605	5.03513	6.86034	6.88584	6.80953	3.03547	1.60192	3.03547	up	3.72858e-09	1.96258e-08
5111	PCNA	proliferating cell nuclear antigen	6.25295	5.69938	5.71015	4.67317	5.08659	4.50833	-2.19081	-1.13146	2.19081	down	3.00858e-05	6.69055e-05
643827	CNTNAP3P2	contactin associated protein-like 3 pseudogene 2	5.76628	5.49597	5.72993	4.29876	4.45373	4.06855	-2.62148	-1.39038	2.62148	down	1.24062e-07	4.2804e-07
100507387	LOC100507387	uncharacterized LOC100507387	6.50056	6.32676	6.60565	4.72147	5.25913	4.68883	-3.006	-1.58785	3.006	down	1.81235e-07	6.01709e-07
6804	STX1A	syntaxin 1A	6.08027	6.01465	6.07495	8.62412	8.49035	8.42668	5.49109	2.45709	5.49109	up	3.00302e-13	1.28391e-11
51181	DCXR	dicarbonyl/L-xylulose reductase	10.5819	10.6007	10.7442	9.01578	8.93277	8.91867	-3.21885	-1.68655	3.21885	down	6.48343e-13	2.16912e-11
1657	DMXL1	Dmx-like 1	5.64608	5.78839	6.00426	7.05682	7.1374	7.05632	2.41262	1.2706	2.41262	up	2.00612e-08	8.52099e-08
3621	ING1	inhibitor of growth family member 1	7.71148	7.61404	7.91405	9.00259	9.00055	8.99086	2.38085	1.25148	2.38085	up	7.33283e-10	4.96698e-09
347716	USP32P3	ubiquitin specific peptidase 32 pseudogene 3	5.72717	5.81493	5.52955	7.81222	7.90391	7.95866	4.59813	2.20105	4.59813	up	1.43239e-11	2.13314e-10
4833	NME4	NME/NM23 nucleoside diphosphate kinase 4	8.92904	9.01551	9.07465	7.86834	7.88142	7.7638	-2.24785	-1.16855	2.24785	down	1.35759e-10	1.23632e-09
11216	AKAP10	A-kinase anchoring protein 10	6.33299	6.48078	6.58596	7.84955	7.76112	7.85758	2.56005	1.35617	2.56005	up	8.43556e-10	5.60147e-09
7390	UROS	uroporphyrinogen III synthase	9.35151	9.51152	9.66907	7.58573	7.34668	7.42704	-4.16279	-2.05755	4.16279	down	1.77982e-11	2.50671e-10
29780	PARVB	parvin beta	5.76708	5.76597	6.02164	4.86909	4.51624	4.56715	-2.29857	-1.20074	2.29857	down	4.56869e-07	1.39401e-06
10376	TUBA1B	tubulin, alpha 1b	13.4952	13.6324	13.5069	12.0548	12.271	12.3215	-2.51242	-1.32908	2.51242	down	1.02554e-10	9.87316e-10
10069	RWDD2B	RWD domain containing 2B	6.2115	6.31408	6.4681	4.69242	4.54157	4.54908	-3.33311	-1.73687	3.33311	down	1.11369e-09	7.04656e-09
23741	EID1	EP300 interacting inhibitor of differentiation 1	10.8868	10.9298	10.9892	9.87592	9.85446	9.85933	-2.1024	-1.07204	2.1024	down	4.01169e-12	8.11832e-11
729163	FABP5P2	fatty acid binding protein 5 pseudogene 2	8.85118	8.82547	8.73364	5.76875	6.155	6.16402	-6.84084	-2.77417	6.84084	down	4.69686e-12	9.12942e-11
55137	FIGN	fidgetin	5.87116	5.79071	6.08913	4.05283	4.3519	4.17694	-3.30147	-1.72311	3.30147	down	6.45987e-09	3.17206e-08
10520	ZNF211	zinc finger protein 211	4.2602	4.37415	4.01191	5.14727	5.2019	5.3204	2.0108	1.00777	2.0108	up	1.99363e-06	5.40145e-06
10972	TMED10	transmembrane p24 trafficking protein 10	10.0655	10.0813	9.91504	8.53923	8.86273	8.8479	-2.4127	-1.27065	2.4127	down	3.01197e-09	1.63584e-08
10838	ZNF275	zinc finger protein 275	6.44079	6.21251	6.26169	8.45638	8.38342	8.366	4.278	2.09694	4.278	up	3.33072e-12	7.05063e-11
54520	CCDC93	coiled-coil domain containing 93	6.26147	6.26633	6.29036	8.60363	8.64231	8.55964	5.02506	2.32914	5.02506	up	7.52727e-14	5.02809e-12
55031	USP47	ubiquitin specific peptidase 47	9.96009	9.91467	9.89331	10.9011	10.9133	10.97	2.0075	1.0054	2.0075	up	7.14372e-12	1.24567e-10
3339	HSPG2	heparan sulfate proteoglycan 2	8.61816	8.51479	8.72941	7.44282	7.24	7.26461	-2.4708	-1.30498	2.4708	down	7.28281e-10	4.94151e-09
642819	ZNF487	zinc finger protein 487	4.0154	3.70952	3.7846	4.87796	5.01855	4.72215	2.05107	1.03638	2.05107	up	2.34334e-06	6.26594e-06
64412	GZF1	GDNF-inducible zinc finger protein 1	7.34055	7.25439	7.3514	8.42626	8.40835	8.4127	2.14403	1.10032	2.14403	up	1.62909e-10	1.43962e-09
1002	CDH4	cadherin 4, type 1, R-cadherin (retinal)	8.9889	8.90706	9.05498	7.81167	7.75407	7.71987	-2.33234	-1.22178	2.33234	down	5.82178e-11	6.2758e-10
57678	GPAM	glycerol-3-phosphate acyltransferase, mitochondrial	7.85287	7.90093	7.90981	6.80808	6.90008	6.85836	-2.04537	-1.03236	2.04537	down	1.09148e-09	6.92849e-09
29128	UHRF1	ubiquitin-like with PHD and ring finger domains 1	10.1985	10.187	10.1513	7.36433	7.32268	7.23506	-7.31871	-2.87159	7.31871	down	9.60198e-16	3.71501e-13
23457	ABCB9	ATP binding cassette subfamily B member 9	5.33801	5.36171	5.61405	6.66098	6.63313	6.52674	2.2486	1.16903	2.2486	up	5.61856e-08	2.11539e-07
129607	CMPK2	cytidine monophosphate (UMP-CMP) kinase 2, mitochondrial	3.9238	3.71049	4.20132	5.61163	5.39812	5.4834	2.93328	1.55251	2.93328	up	7.43331e-08	2.70937e-07
55506	H2AFY2	H2A histone family member Y2	6.18941	6.17353	6.12491	4.66179	4.40317	4.23867	-3.31285	-1.72807	3.31285	down	5.17016e-09	2.60555e-08
65977	PLEKHA3	pleckstrin homology domain containing A3	8.84307	8.81725	8.80442	10.1092	10.2078	10.2313	2.569	1.36121	2.569	up	1.50388e-12	3.93009e-11
203413	CT83	cancer/testis antigen 83	7.3134	7.42011	7.29978	5.573	5.82511	5.93046	-2.96543	-1.56824	2.96543	down	2.19716e-09	1.25744e-08
57460	PPM1H	protein phosphatase, Mg2+/Mn2+ dependent 1H	7.20711	7.14482	7.09747	5.83359	6.00425	5.8284	-2.39671	-1.26105	2.39671	down	2.99662e-09	1.62954e-08
83891	SNX25	sorting nexin 25	8.20777	8.20494	8.24604	9.21016	9.28217	9.20108	2.01608	1.01155	2.01608	up	6.62979e-11	6.93262e-10
6101	RP1	retinitis pigmentosa 1 (autosomal dominant)	3.51121	3.2977	3.83836	5.00361	4.95304	4.70695	2.52937	1.33878	2.52937	up	1.08059e-06	3.07301e-06
90120	C9orf69	chromosome 9 open reading frame 69	9.02843	9.05238	9.00106	7.92544	7.7544	7.82456	-2.28547	-1.19249	2.28547	down	7.68743e-11	7.81802e-10
10000	AKT3	v-akt murine thymoma viral oncogene homolog 3	5.17658	5.05101	5.20373	5.96369	6.27802	6.35587	2.07832	1.05542	2.07832	up	8.41369e-07	2.43849e-06
6240	RRM1	ribonucleotide reductase M1	10.1744	10.1098	10.0409	8.20832	8.31861	8.27061	-3.5863	-1.8425	3.5863	down	1.76887e-13	8.85808e-12
81853	TMEM14B	transmembrane protein 14B	11.9692	11.9512	11.8774	10.0559	10.231	10.2968	-3.33575	-1.73801	3.33575	down	1.44448e-12	3.82166e-11
4938	OAS1	2'-5'-oligoadenylate synthetase 1	6.12791	6.16393	6.38355	5.06331	4.64747	4.44032	-2.84435	-1.5081	2.84435	down	3.24042e-07	1.02084e-06
23450	SF3B3	splicing factor 3b subunit 3	6.23916	6.38441	6.61106	7.66556	7.61182	7.59482	2.31743	1.21252	2.31743	up	1.84259e-08	7.90865e-08
9656	MDC1	mediator of DNA damage checkpoint 1	9.16517	9.10353	9.1984	8.00713	7.86378	7.85634	-2.37284	-1.24662	2.37284	down	5.65616e-11	6.14193e-10
56122	PCDHB14	protocadherin beta 14	6.07885	5.88803	5.78316	5.00293	4.83062	4.80989	-2.04987	-1.03553	2.04987	down	5.77282e-07	1.72703e-06
83604	TMEM47	transmembrane protein 47	9.53213	9.54492	9.51587	7.29555	7.38074	7.35404	-4.55525	-2.18753	4.55525	down	1.57511e-14	1.89387e-12
8195	MKKS	McKusick-Kaufman syndrome	10.2967	10.4064	10.2903	8.7993	8.91511	8.88728	-2.75857	-1.46392	2.75857	down	1.77145e-12	4.43169e-11
1306	COL15A1	collagen, type XV, alpha 1	4.17057	3.49018	4.19974	6.59496	6.44055	6.46655	5.84495	2.54719	5.84495	up	4.5695e-09	2.34027e-08
100287932	TIMM23	translocase of inner mitochondrial membrane 23 homolog (yeast)	6.12813	6.12027	6.20206	7.31217	7.19878	7.32399	2.1858	1.12816	2.1858	up	3.34927e-09	1.79066e-08
221656	KDM1B	lysine (K)-specific demethylase 1B	7.21517	7.19039	7.23134	5.90286	5.95094	5.92736	-2.43724	-1.28525	2.43724	down	5.065e-10	3.66125e-09
1787	TRDMT1	tRNA aspartic acid methyltransferase 1	6.73367	6.66424	6.5479	5.43854	5.74921	5.57627	-2.08579	-1.0606	2.08579	down	1.91019e-07	6.30977e-07
7182	NR2C2	nuclear receptor subfamily 2 group C member 2	5.7449	5.62458	6.03686	7.32475	7.43527	7.49346	3.06463	1.61571	3.06463	up	3.82005e-09	2.00613e-08
83448	PUS7L	pseudouridylate synthase 7-like	6.21792	6.30259	6.27336	4.9387	5.01452	5.00053	-2.42846	-1.28004	2.42846	down	5.28057e-09	2.65503e-08
54661	PCDHB17P	protocadherin beta 17 pseudogene	5.07217	5.86503	5.6275	4.06333	4.0462	3.75654	-2.96126	-1.56621	2.96126	down	1.70659e-06	4.68318e-06
26272	FBXO4	F-box protein 4	6.86211	6.80049	6.93496	4.65911	4.81861	4.75647	-4.35033	-2.12112	4.35033	down	2.71909e-11	3.47008e-10
28935	IGKV1-27	immunoglobulin kappa variable 1-27	4.33327	3.91581	4.50467	5.51813	5.11034	5.24827	2.05765	1.041	2.05765	up	2.58944e-05	5.81304e-05
440957	SMIM4	small integral membrane protein 4	10.1957	10.1643	10.2593	8.42891	8.22133	8.27038	-3.73099	-1.89956	3.73099	down	6.00259e-13	2.06482e-11
79023	NUP37	nucleoporin 37kDa	9.11832	9.08009	9.18156	7.93678	8.05629	8.04262	-2.16559	-1.11476	2.16559	down	1.01193e-10	9.76376e-10
63979	FIGNL1	fidgetin-like 1	10.0567	10.0006	9.97033	8.2711	8.31629	8.32615	-3.25957	-1.70468	3.25957	down	9.59415e-14	5.87634e-12
2354	FOSB	FBJ murine osteosarcoma viral oncogene homolog B	4.89581	4.95344	4.44776	6.32075	6.10447	6.13956	2.68066	1.42259	2.68066	up	2.30099e-07	7.48486e-07
84191	FAM96A	family with sequence similarity 96 member A	10.098	9.94729	9.78582	8.78182	8.95409	9.07129	-2.01108	-1.00797	2.01108	down	5.37017e-08	2.03481e-07
9939	RBM8A	RNA binding motif protein 8A	4.97221	5.16685	5.06689	6.58649	6.39889	6.44739	2.65542	1.40894	2.65542	up	5.26969e-09	2.65058e-08
158747	MOSPD2	motile sperm domain containing 2	9.46073	9.29393	9.24974	8.20795	8.24358	8.27913	-2.13058	-1.09125	2.13058	down	4.41953e-10	3.26777e-09
10413	YAP1	Yes associated protein 1	7.44165	7.36829	7.27626	8.67873	8.80286	8.78169	2.62508	1.39236	2.62508	up	4.61929e-11	5.20946e-10
79026	AHNAK	AHNAK nucleoprotein	8.2253	8.25075	8.41856	6.33915	6.48413	6.32638	-3.77109	-1.91498	3.77109	down	1.22407e-11	1.89395e-10
57602	USP36	ubiquitin specific peptidase 36	6.96467	7.01631	7.13902	8.51132	8.48697	8.4931	2.74562	1.45713	2.74562	up	2.55834e-11	3.31583e-10
3949	LDLR	low density lipoprotein receptor	9.14062	9.15978	9.06474	10.8627	10.9968	11.0497	3.60002	1.848	3.60002	up	2.64251e-13	1.16679e-11
9235	IL32	interleukin 32	7.51509	7.39754	7.51047	6.20346	6.05749	6.20819	-2.49318	-1.31799	2.49318	down	8.97174e-10	5.8972e-09
374986	FAM73A	family with sequence similarity 73 member A	5.37621	5.32622	5.23988	6.34601	6.6838	6.60215	2.34548	1.22988	2.34548	up	5.95763e-08	2.22696e-07
5577	PRKAR2B	protein kinase, cAMP-dependent, regulatory subunit type II beta	8.37616	8.15502	8.183	7.08138	7.18934	7.22875	-2.10172	-1.07157	2.10172	down	5.77185e-09	2.86845e-08
55504	TNFRSF19	tumor necrosis factor receptor superfamily member 19	6.25797	6.60908	6.3328	4.40982	4.32928	4.54721	-3.92089	-1.97118	3.92089	down	1.07195e-09	6.82003e-09
9352	TXNL1	thioredoxin like 1	10.6888	10.4946	10.5782	11.6154	11.6934	11.743	2.13871	1.09674	2.13871	up	9.19922e-11	9.05714e-10
56938	ARNTL2	aryl hydrocarbon receptor nuclear translocator like 2	8.97919	8.81415	8.92674	7.81952	7.8406	7.83774	-2.10537	-1.07407	2.10537	down	2.26581e-10	1.8919e-09
146705	ENTHD2	ENTH domain containing 2	6.66676	6.47888	6.69301	8.21781	8.22572	8.26885	3.08352	1.62458	3.08352	up	3.84945e-11	4.53361e-10
993	CDC25A	cell division cycle 25A	6.27798	6.20885	6.2332	4.92707	5.36011	5.40471	-2.01305	-1.00938	2.01305	down	3.17715e-06	8.28242e-06
5794	PTPRH	protein tyrosine phosphatase, receptor type, H	5.71247	5.62578	5.74732	7.09424	7.13338	7.04172	2.62914	1.39459	2.62914	up	5.85039e-10	4.12494e-09
284992	CCDC150	coiled-coil domain containing 150	6.52892	6.39394	6.70646	5.4098	5.35873	5.31177	-2.27049	-1.18301	2.27049	down	4.91843e-08	1.88005e-07
105376798	LOC105376798	uncharacterized LOC105376798	4.22169	4.11377	4.36834	5.61286	5.27831	5.59186	2.39453	1.25974	2.39453	up	2.72461e-07	8.72917e-07
5239	PGM5	phosphoglucomutase 5	7.80116	7.93094	7.82719	6.43922	6.4757	6.46912	-2.62397	-1.39175	2.62397	down	9.19619e-11	9.05644e-10
5985	RFC5	replication factor C subunit 5	9.57096	9.56324	9.50676	7.72583	7.868	7.81339	-3.35097	-1.74458	3.35097	down	4.71716e-13	1.73899e-11
7422	VEGFA	vascular endothelial growth factor A	6.83425	6.81234	6.93776	7.81336	7.92341	8.05638	2.09885	1.0696	2.09885	up	8.05661e-09	3.84359e-08
9765	ZFYVE16	zinc finger, FYVE domain containing 16	4.56974	4.92529	4.86101	5.86141	6.12673	5.91421	2.26907	1.1821	2.26907	up	4.39287e-07	1.34446e-06
166929	SGMS2	sphingomyelin synthase 2	4.42322	4.8069	4.80713	6.09858	6.11203	6.04401	2.64963	1.40579	2.64963	up	5.47278e-08	2.06704e-07
146050	ZSCAN29	zinc finger and SCAN domain containing 29	6.46956	6.43149	6.29705	7.32572	7.48744	7.46438	2.03705	1.02648	2.03705	up	1.88352e-08	8.06864e-08
79157	MFSD11	major facilitator superfamily domain containing 11	8.40325	8.33381	8.35383	9.30164	9.40231	9.45615	2.03224	1.02307	2.03224	up	1.98274e-10	1.69059e-09
101930123	LOC101930123	eukaryotic elongation factor 2 kinase	8.09411	7.93313	8.05216	7.00765	6.89832	6.8366	-2.16187	-1.11228	2.16187	down	2.4879e-09	1.39343e-08
56667	MUC13	mucin 13, cell surface associated	5.69299	5.40489	6.13575	8.15845	8.12619	7.93065	5.01837	2.32722	5.01837	up	3.43808e-09	1.83213e-08
221302	ZUFSP	zinc finger with UFM1-specific peptidase domain	7.22686	7.255	7.26305	8.27267	8.34393	8.37474	2.11718	1.08214	2.11718	up	2.43771e-10	2.0046e-09
8706	B3GALNT1	beta-1,3-N-acetylgalactosaminyltransferase 1 (globoside blood group)	7.66278	7.59231	7.81009	6.75801	6.66778	6.56355	-2.03535	-1.02528	2.03535	down	2.37702e-08	9.91109e-08
54033	RBM11	RNA binding motif protein 11	3.46832	3.49377	3.99706	4.68883	4.67644	4.6773	2.03892	1.02781	2.03892	up	1.13513e-05	2.69127e-05
64506	CPEB1	cytoplasmic polyadenylation element binding protein 1	3.97298	4.11867	4.16002	4.94681	5.2019	5.37331	2.12891	1.09012	2.12891	up	1.67755e-06	4.61094e-06
658	BMPR1B	bone morphogenetic protein receptor type IB	3.48153	3.9476	3.93973	5.35878	5.66803	5.42922	3.23939	1.69572	3.23939	up	7.16718e-08	2.62239e-07
402682	UFSP1	UFM1-specific peptidase 1 (inactive)	6.56338	6.50412	6.72159	5.40312	5.61249	5.5629	-2.09971	-1.07019	2.09971	down	1.044e-07	3.6673e-07
51435	SCARA3	scavenger receptor class A, member 3	7.61677	7.65846	7.75111	6.63628	6.64346	6.60784	-2.06516	-1.04625	2.06516	down	2.2432e-09	1.27949e-08
4288	MKI67	marker of proliferation Ki-67	7.75007	7.69773	7.68694	3.94827	3.64025	4.01344	-14.3627	-3.84426	14.3627	down	2.8388e-13	1.22712e-11
84460	ZMAT1	zinc finger, matrin-type 1	5.41893	5.44046	5.47754	3.41987	3.75628	3.62999	-3.58904	-1.8436	3.58904	down	1.98397e-09	1.15197e-08
6482	ST3GAL1	ST3 beta-galactoside alpha-2,3-sialyltransferase 1	6.06456	6.15347	6.28	8.37586	8.25037	8.28687	4.4026	2.13836	4.4026	up	2.9312e-12	6.41695e-11
53826	FXYD6	FXYD domain containing ion transport regulator 6	5.32088	5.58364	5.43609	4.15099	3.36252	3.73321	-3.24443	-1.69796	3.24443	down	4.96019e-07	1.50244e-06
144165	PRICKLE1	prickle homolog 1	7.43968	7.39222	7.43732	5.90252	5.93595	6.00772	-2.77857	-1.47434	2.77857	down	1.17914e-10	1.1055e-09
6305	SBF1	SET binding factor 1	8.118	7.96052	8.07888	9.11661	9.0533	9.10084	2.05307	1.03778	2.05307	up	2.81088e-10	2.25685e-09
11277	TREX1	three prime repair exonuclease 1	8.14623	8.32269	8.36548	6.9207	6.8122	6.75866	-2.72756	-1.44761	2.72756	down	2.52253e-10	2.06565e-09
9451	EIF2AK3	eukaryotic translation initiation factor 2-alpha kinase 3	6.43445	6.2647	6.19508	7.53844	7.86657	7.80922	2.71321	1.44	2.71321	up	5.71318e-09	2.84154e-08
11157	LSM6	LSM6 homolog, U6 small nuclear RNA and mRNA degradation associated	9.8147	9.8256	9.73923	8.77909	8.65377	8.69863	-2.11797	-1.08268	2.11797	down	4.69876e-11	5.27625e-10
197370	NSMCE1	NSE1 homolog, SMC5-SMC6 complex component	9.31425	9.28987	9.46608	7.9486	7.90905	7.8924	-2.7133	-1.44005	2.7133	down	1.0591e-11	1.69131e-10
79644	SRD5A3	steroid 5 alpha-reductase 3	9.10254	9.04291	9.09064	7.82135	7.834	7.8499	-2.36791	-1.24361	2.36791	down	7.04482e-12	1.23283e-10
545	ATR	ATR serine/threonine kinase	8.07201	8.17723	8.17308	6.97027	6.8558	6.92318	-2.33651	-1.22436	2.33651	down	2.30112e-10	1.91606e-09
80233	FAAP100	Fanconi anemia core complex associated protein 100	8.06304	8.0467	8.18983	6.98984	6.93581	6.98225	-2.18943	-1.13056	2.18943	down	5.67173e-10	4.02313e-09
84775	ZNF607	zinc finger protein 607	5.58618	5.46297	5.40672	4.53097	4.32815	4.57476	-2.01019	-1.00733	2.01019	down	7.28773e-07	2.13656e-06
10901	DHRS4	dehydrogenase/reductase (SDR family) member 4	8.6453	8.57482	8.54099	7.28915	7.30019	7.54016	-2.31424	-1.21054	2.31424	down	1.48728e-09	9.01199e-09
9842	PLEKHM1	pleckstrin homology and RUN domain containing M1	5.17748	5.03896	4.99476	6.49081	6.60142	6.54589	2.78107	1.47564	2.78107	up	1.73787e-09	1.02724e-08
51569	UFM1	ubiquitin-fold modifier 1	8.16527	8.11477	8.21907	9.42053	9.51705	9.57875	2.52989	1.33907	2.52989	up	1.52919e-11	2.2312e-10
54466	SPIN2A	spindlin family member 2A	7.89998	7.89494	7.87217	6.83905	6.96719	6.84175	-2.00885	-1.00637	2.00885	down	2.21449e-09	1.26607e-08
9133	CCNB2	cyclin B2	10.0594	9.91727	10.006	8.29515	8.31172	8.31521	-3.21957	-1.68687	3.21957	down	2.56998e-13	1.14283e-11
55254	TMEM39A	transmembrane protein 39A	6.97446	7.13029	7.12642	8.31797	8.24762	8.34179	2.33821	1.2254	2.33821	up	3.03168e-10	2.40016e-09
84275	SLC25A33	solute carrier family 25 (pyrimidine nucleotide carrier), member 33	9.2682	9.25198	9.1719	10.6115	10.636	10.6563	2.6462	1.40392	2.6462	up	3.65921e-13	1.47871e-11
653689	GSTT2B	glutathione S-transferase theta 2B (gene/pseudogene)	7.39024	7.41624	7.4815	6.28344	6.32597	6.31328	-2.17613	-1.12176	2.17613	down	1.39963e-09	8.55787e-09
339229	OXLD1	oxidoreductase-like domain containing 1	7.36137	7.31087	7.31773	5.80165	5.30725	5.96985	-3.11034	-1.63707	3.11034	down	7.22672e-08	2.64294e-07
7376	NR1H2	nuclear receptor subfamily 1 group H member 2	7.51703	7.55486	7.65597	8.72101	8.63227	8.66404	2.13833	1.09649	2.13833	up	2.66742e-10	2.16389e-09
118924	FRA10AC1	fragile site, folic acid type, rare, fra(10)(q23.3) or fra(10)(q24.2) candidate 1	7.97883	7.89957	7.98926	6.71416	6.75147	6.76457	-2.31737	-1.21249	2.31737	down	1.92312e-10	1.64802e-09
23002	DAAM1	dishevelled associated activator of morphogenesis 1	7.54967	7.64213	7.50085	6.48909	6.56597	6.5726	-2.03026	-1.02166	2.03026	down	5.09694e-09	2.57263e-08
1956	EGFR	epidermal growth factor receptor	7.88837	7.83142	8.0413	9.20809	9.17425	9.12889	2.37849	1.25005	2.37849	up	1.19255e-10	1.11355e-09
9931	HELZ	helicase with zinc finger	4.46399	4.36898	4.15507	5.37352	5.49244	5.42942	2.14719	1.10245	2.14719	up	3.62974e-07	1.13037e-06
65055	REEP1	receptor accessory protein 1	6.72502	7.00891	6.75937	4.70124	4.76819	4.77157	-4.24011	-2.0841	4.24011	down	1.07429e-10	1.02264e-09
219970	GLYATL2	glycine-N-acyltransferase like 2	5.46593	5.21546	5.84593	3.71834	3.86687	3.8155	-3.26905	-1.70887	3.26905	down	8.62059e-08	3.09279e-07
153222	CREBRF	CREB3 regulatory factor	5.17576	5.17652	4.94488	9.02681	9.1052	9.17208	16.0256	4.00231	16.0256	up	6.75048e-15	1.1273e-12
2954	GSTZ1	glutathione S-transferase zeta 1	7.71168	7.74157	7.78015	6.83738	6.44071	6.53595	-2.20348	-1.13979	2.20348	down	5.39319e-08	2.04156e-07
3954	LETM1	leucine zipper-EF-hand containing transmembrane protein 1	7.79389	7.73508	7.88588	8.93579	8.96016	8.92472	2.1966	1.13527	2.1966	up	9.2215e-11	9.07021e-10
3930	LBR	lamin B receptor	8.89225	8.82275	8.76657	7.58785	7.82012	7.65307	-2.20408	-1.14018	2.20408	down	1.0953e-09	6.94822e-09
151246	SGOL2	shugoshin-like 2 (S. pombe)	8.36684	8.29553	8.4936	6.09715	6.22833	6.08608	-4.75069	-2.24814	4.75069	down	1.67761e-12	4.25688e-11
29919	C18orf8	chromosome 18 open reading frame 8	8.23956	8.41392	8.14943	9.46781	9.53061	9.56173	2.3824	1.25241	2.3824	up	2.90653e-10	2.31698e-09
11230	PRAF2	PRA1 domain family member 2	6.49761	6.38092	6.76439	5.31382	5.00368	5.05624	-2.68154	-1.42306	2.68154	down	6.77748e-08	2.49452e-07
3184	HNRNPD	heterogeneous nuclear ribonucleoprotein D	9.21618	9.09884	9.01001	7.08146	7.15894	7.18807	-3.90553	-1.96552	3.90553	down	1.31266e-12	3.56215e-11
80210	ARMC9	armadillo repeat containing 9	8.62123	8.44437	8.5612	7.41111	7.39206	7.42284	-2.19405	-1.1336	2.19405	down	3.02829e-10	2.39839e-09
6487	ST3GAL3	ST3 beta-galactoside alpha-2,3-sialyltransferase 3	7.42692	7.4045	7.52383	6.11572	6.05883	6.09961	-2.5675	-1.36036	2.5675	down	2.83631e-10	2.27213e-09
10463	SLC30A9	solute carrier family 30 (zinc transporter), member 9	9.81765	9.73523	9.72222	8.23342	8.25958	8.29912	-2.81733	-1.49433	2.81733	down	7.62516e-13	2.42645e-11
132320	SCLT1	sodium channel and clathrin linker 1	5.573	5.23137	5.39068	4.09499	4.5635	4.23661	-2.14352	-1.09998	2.14352	down	4.10614e-06	1.04832e-05
4097	MAFG	v-maf avian musculoaponeurotic fibrosarcoma oncogene homolog G	8.00675	7.94993	7.94744	9.25763	9.29483	9.27199	2.47388	1.30678	2.47388	up	3.15629e-12	6.75827e-11
28987	NOB1	NIN1/RPN12 binding protein 1 homolog	9.27503	9.11588	9.29734	10.3849	10.3882	10.3979	2.23598	1.16091	2.23598	up	3.56446e-11	4.27591e-10
728712	SPANXA2	SPANX family member A2	11.3156	11.2482	11.2691	9.96392	10.0841	10.078	-2.35486	-1.23564	2.35486	down	2.41564e-12	5.52024e-11
10957	PNRC1	proline rich nuclear receptor coactivator 1	7.01794	6.92132	6.97875	9.10512	9.16293	9.09243	4.43056	2.14749	4.43056	up	6.89248e-14	4.78397e-12
2764	GMFB	glia maturation factor, beta	9.94505	9.92485	9.70293	8.32719	8.5537	8.71161	-2.50842	-1.32678	2.50842	down	6.91485e-09	3.3621e-08
2872	MKNK2	MAP kinase interacting serine/threonine kinase 2	8.47963	8.49293	8.66603	9.91343	9.87171	9.84477	2.51479	1.33044	2.51479	up	2.2154e-11	2.96884e-10
3670	ISL1	ISL LIM homeobox 1	6.24069	6.43991	6.15654	5.09175	5.03277	5.00238	-2.35666	-1.23675	2.35666	down	3.45854e-08	1.37908e-07
81532	MOB2	MOB kinase activator 2	6.679	6.93021	6.8105	8.70971	8.57105	8.51715	3.46471	1.79273	3.46471	up	3.57239e-11	4.28019e-10
1122	CHML	choroideremia-like (Rab escort protein 2)	5.82483	5.96367	5.66097	4.44365	4.78463	4.89045	-2.15883	-1.11025	2.15883	down	2.16938e-06	5.83836e-06
54933	RHBDL2	rhomboid, veinlet-like 2 (Drosophila)	5.35127	5.22563	5.53385	4.35587	4.17103	4.40778	-2.08304	-1.05869	2.08304	down	9.83897e-07	2.81937e-06
10403	NDC80	NDC80 kinetochore complex component	8.9334	8.96051	8.80577	5.58786	5.63072	5.45627	-10.1374	-3.34161	10.1374	down	1.64673e-14	1.94997e-12
440292	LOC440292	COMM domain-containing protein 4-like	10.7921	10.9193	10.9189	9.54453	9.49825	9.47901	-2.58386	-1.36953	2.58386	down	1.41527e-12	3.76982e-11
324	APC	adenomatous polyposis coli	7.13382	7.11939	6.85989	7.95883	8.064	8.12298	2.01517	1.0109	2.01517	up	4.23127e-08	1.64576e-07
3178	HNRNPA1	heterogeneous nuclear ribonucleoprotein A1	9.43226	9.45187	9.48291	10.3867	10.5459	10.5766	2.06674	1.04736	2.06674	up	1.39492e-10	1.26355e-09
8971	H1FX	H1 histone family member X	10.2108	10.2621	10.3137	8.4706	8.42435	8.37142	-3.5803	-1.84008	3.5803	down	7.0852e-14	4.87444e-12
115352	FCRL3	Fc receptor-like 3	4.01054	4.33166	3.76771	6.00616	6.11412	5.94426	3.95829	1.98488	3.95829	up	7.59869e-09	3.64963e-08
79101	TAF1D	TATA-box binding protein associated factor, RNA polymerase I, D	7.30361	7.24103	7.37943	8.4577	8.4341	8.49245	2.22436	1.15339	2.22436	up	1.70981e-10	1.49736e-09
10312	TCIRG1	T-cell, immune regulator 1, ATPase, H+ transporting, lysosomal V0 subunit A3	8.49205	8.43515	8.50903	6.91809	6.89299	6.83293	-3.02599	-1.59741	3.02599	down	4.15366e-12	8.30668e-11
105372942	LOC105372942	uncharacterized LOC105372942	6.6275	6.13191	6.02627	5.22521	5.27247	5.13587	-2.07155	-1.05071	2.07155	down	7.65773e-06	1.86944e-05
83607	AMMECR1L	AMMECR1 like	4.53228	4.46686	4.61546	6.32851	6.31614	6.30642	3.43146	1.77882	3.43146	up	2.27487e-10	1.89906e-09
771	CA12	carbonic anhydrase XII	8.56014	8.62704	8.64242	7.47972	7.31976	7.37286	-2.32799	-1.21909	2.32799	down	1.34143e-10	1.22446e-09
285362	SUMF1	sulfatase modifying factor 1	9.42839	9.47725	9.45054	7.97298	8.12503	8.06659	-2.63389	-1.39719	2.63389	down	5.40167e-12	1.01125e-10
5770	PTPN1	protein tyrosine phosphatase, non-receptor type 1	9.9906	9.99188	9.95789	11.0601	11.066	11.0495	2.11173	1.07842	2.11173	up	9.18754e-13	2.76383e-11
9902	MRC2	mannose receptor, C type 2	10.1967	10.1922	10.2142	8.64182	8.67773	8.68507	-2.89348	-1.53281	2.89348	down	8.63938e-14	5.47166e-12
57551	TAOK1	TAO kinase 1	5.25857	5.40596	5.8251	7.33663	7.57735	7.50679	3.93686	1.97705	3.93686	up	5.0005e-09	2.53213e-08
1390	CREM	cAMP responsive element modulator	7.94477	7.88798	7.93904	5.98919	5.75259	5.86884	-4.15176	-2.05372	4.15176	down	7.67411e-12	1.317e-10
684959	SNORA25	small nucleolar RNA, H/ACA box 25	7.30361	7.24103	7.37943	8.4577	8.4341	8.49245	2.22436	1.15339	2.22436	up	1.70981e-10	1.49736e-09
84547	PGBD1	piggyBac transposable element derived 1	5.52604	5.20654	5.48807	3.58549	3.75385	3.39019	-3.55629	-1.83037	3.55629	down	1.02512e-08	4.72723e-08
347735	SERINC2	serine incorporator 2	10.4306	10.3747	10.4886	8.86288	8.74884	8.77512	-3.10733	-1.63567	3.10733	down	3.50504e-13	1.43121e-11
352909	DNAAF3	dynein, axonemal, assembly factor 3	5.09095	5.23399	4.94723	4.07827	3.54655	3.44642	-2.63958	-1.40031	2.63958	down	1.67164e-06	4.59565e-06
283383	ADGRD1	adhesion G protein-coupled receptor D1	5.65102	5.76395	5.78403	4.48089	4.71343	4.79652	-2.09854	-1.06939	2.09854	down	4.52567e-07	1.38218e-06
81493	SYNC	syncoilin, intermediate filament protein	9.09192	9.11143	8.99238	7.39765	7.53903	7.43642	-3.04732	-1.60754	3.04732	down	4.59628e-12	8.98044e-11
646214	LOC646214	p21 protein (Cdc42/Rac)-activated kinase 2 pseudogene	5.76205	5.83083	5.8119	6.96118	6.9146	6.99253	2.22609	1.15451	2.22609	up	3.33289e-09	1.78288e-08
79902	NUP85	nucleoporin 85kDa	8.89375	8.83981	8.89244	7.63044	7.86014	7.78117	-2.17058	-1.11808	2.17058	down	6.84146e-10	4.68613e-09
84930	MASTL	microtubule associated serine/threonine kinase like	8.79041	8.77211	8.7401	6.97327	7.19513	7.31655	-3.04383	-1.60589	3.04383	down	1.68339e-10	1.47891e-09
129790	C7orf13	chromosome 7 open reading frame 13	8.50672	8.39891	8.46308	5.99698	6.15878	6.18398	-5.07353	-2.34299	5.07353	down	6.6402e-13	2.20645e-11
1163	CKS1B	CDC28 protein kinase regulatory subunit 1B	10.5623	10.5284	10.6289	9.22316	9.24607	9.26594	-2.5108	-1.32815	2.5108	down	6.80293e-13	2.24147e-11
51329	ARL6IP4	ADP ribosylation factor like GTPase 6 interacting protein 4	9.40918	9.40833	9.49092	8.23155	8.16781	8.07111	-2.42725	-1.27932	2.42725	down	2.49754e-11	3.25429e-10
10427	SEC24B	SEC24 homolog B, COPII coat complex component	8.24357	8.22644	8.1122	10.1471	10.1342	10.1497	3.86265	1.94959	3.86265	up	4.65688e-14	3.66151e-12
10019	SH2B3	SH2B adaptor protein 3	7.65534	7.68746	7.66136	8.82988	8.73028	8.74952	2.14628	1.10184	2.14628	up	7.86223e-11	7.95527e-10
79621	RNASEH2B	ribonuclease H2 subunit B	9.78889	9.75534	9.82395	8.70953	8.68207	8.67377	-2.14494	-1.10094	2.14494	down	7.46691e-12	1.29165e-10
29110	TBK1	TANK-binding kinase 1	7.52521	7.47457	7.53118	8.50074	8.64422	8.71825	2.15958	1.11075	2.15958	up	8.10391e-10	5.41605e-09
343171	OR2W3	olfactory receptor, family 2, subfamily W, member 3	6.2408	6.14019	6.34492	4.02448	3.81193	4.0311	-4.87747	-2.28613	4.87747	down	8.7978e-11	8.71904e-10
1301	COL11A1	collagen, type XI, alpha 1	6.08638	6.13159	6.07196	4.84044	4.57767	4.58935	-2.68978	-1.42749	2.68978	down	1.00243e-08	4.63901e-08
642799	NPIPA2	nuclear pore complex interacting protein family member A2	7.01376	6.99001	6.99739	8.51855	8.39245	8.4693	2.75054	1.45971	2.75054	up	1.21608e-11	1.885e-10
2149	F2R	coagulation factor II (thrombin) receptor	7.72314	7.70223	7.86307	6.57881	6.66915	6.70142	-2.16298	-1.11302	2.16298	down	2.69752e-09	1.49117e-08
3312	HSPA8	heat shock protein family A (Hsp70) member 8	4.81397	4.88951	5.02735	7.18765	7.21443	7.23475	4.93141	2.302	4.93141	up	7.71031e-12	1.31916e-10
291	SLC25A4	solute carrier family 25 (mitochondrial carrier; adenine nucleotide translocator), member 4	8.04016	8.1841	8.3778	6.7236	6.54262	6.5747	-3.00434	-1.58705	3.00434	down	6.87968e-10	4.70901e-09
873	CBR1	carbonyl reductase 1	10.6751	10.6526	10.6776	9.29323	9.34515	9.34674	-2.53166	-1.34008	2.53166	down	2.17801e-13	1.0255e-11
7110	TMF1	TATA element modulatory factor 1	5.87499	5.85221	5.97585	7.13399	7.21558	7.21692	2.44158	1.28781	2.44158	up	1.08848e-09	6.91393e-09
23348	DOCK9	dedicator of cytokinesis 9	7.56389	7.72886	7.71818	9.75147	9.81037	9.80937	4.34722	2.12009	4.34722	up	1.08066e-13	6.35687e-12
9284	NPIPA1	nuclear pore complex interacting protein family member A1	7.01376	6.99001	6.99739	8.51855	8.39245	8.4693	2.75054	1.45971	2.75054	up	1.21608e-11	1.885e-10
3418	IDH2	isocitrate dehydrogenase 2 (NADP+), mitochondrial	6.62354	6.3912	6.4603	4.83023	4.55363	4.79124	-3.40262	-1.76665	3.40262	down	1.73671e-09	1.02686e-08
100534612	C1QTNF3-AMACR	C1QTNF3-AMACR readthrough (NMD candidate)	5.3446	5.03237	5.16364	3.96352	4.08047	4.29628	-2.09475	-1.06678	2.09475	down	1.86122e-06	5.07295e-06
388969	C2orf68	chromosome 2 open reading frame 68	6.60498	6.48322	6.54938	4.88347	4.75187	4.72475	-3.38502	-1.75916	3.38502	down	2.77805e-10	2.2337e-09
373	TRIM23	tripartite motif containing 23	7.10944	6.92398	6.99395	8.01589	8.13837	8.25064	2.18229	1.12584	2.18229	up	5.2693e-09	2.65058e-08
92283	ZNF461	zinc finger protein 461	5.10197	5.20872	5.13895	6.38371	6.47201	6.56365	2.50228	1.32324	2.50228	up	5.2357e-09	2.63484e-08
25814	ATXN10	ataxin 10	7.293	7.24573	7.66707	5.74049	5.50931	5.33945	-3.66086	-1.87218	3.66086	down	6.73827e-09	3.28892e-08
9315	NREP	neuronal regeneration related protein	8.49079	8.56745	8.67611	5.24021	5.01279	5.18289	-10.799	-3.43282	10.799	down	5.45942e-14	4.07912e-12
29072	SETD2	SET domain containing 2	8.39478	8.41194	8.42739	9.53483	9.50299	9.64344	2.21768	1.14905	2.21768	up	2.84932e-11	3.59388e-10
7360	UGP2	UDP-glucose pyrophosphorylase 2	11.8509	11.8296	11.8337	10.6732	10.5795	10.6521	-2.30235	-1.20311	2.30235	down	4.68736e-13	1.73872e-11
2734	GLG1	golgi glycoprotein 1	3.81275	3.74215	4.09695	5.81425	5.46564	5.30675	3.12733	1.64493	3.12733	up	1.12821e-07	3.93073e-07
10449	ACAA2	acetyl-CoA acyltransferase 2	9.0695	8.98384	9.09874	7.69242	7.51531	7.62002	-2.71592	-1.44144	2.71592	down	2.18711e-11	2.93796e-10
6567	SLC16A2	solute carrier family 16, member 2 (thyroid hormone transporter)	8.5273	8.40405	8.50769	6.49508	6.54412	6.44693	-3.95672	-1.9843	3.95672	down	1.05002e-12	3.04616e-11
3311	HSPA7	heat shock protein family A (Hsp70) member 7	5.11925	5.09472	5.37308	8.1746	8.24195	8.17638	8.01088	3.00196	8.01088	up	4.214e-13	1.63364e-11
2184	FAH	fumarylacetoacetate hydrolase (fumarylacetoacetase)	5.63033	5.44101	5.61419	7.40743	7.44883	7.34175	3.57389	1.83749	3.57389	up	5.29437e-11	5.81636e-10
642846	LOC642846	DEAD/H (Asp-Glu-Ala-Asp/His) box polypeptide 11-like	6.099	5.8896	6.28335	5.35684	4.86891	4.89577	-2.07074	-1.05014	2.07074	down	1.01081e-05	2.42017e-05
25870	SUMF2	sulfatase modifying factor 2	8.69156	8.75279	8.86685	7.61177	7.59718	7.58306	-2.2549	-1.17306	2.2549	down	1.38531e-10	1.25659e-09
9969	MED13	mediator complex subunit 13	6.57168	6.49182	6.71717	8.47839	8.49473	8.4454	3.67892	1.87928	3.67892	up	5.54267e-12	1.0299e-10
5714	PSMD8	proteasome 26S subunit, non-ATPase 8	6.10868	6.36171	6.10868	7.64374	7.5746	7.64789	2.6927	1.42905	2.6927	up	1.06019e-09	6.76391e-09
7520	XRCC5	X-ray repair complementing defective repair in Chinese hamster cells 5	10.5856	10.4768	10.521	9.48328	9.43673	9.46611	-2.09328	-1.06577	2.09328	down	9.23917e-12	1.52273e-10
285671	RNF180	ring finger protein 180	4.24151	3.98338	4.01201	5.32305	5.30707	5.08758	2.23499	1.16027	2.23499	up	3.9124e-07	1.20953e-06
55187	VPS13D	vacuolar protein sorting 13 homolog D (S. cerevisiae)	6.68934	6.61276	6.76786	5.28944	5.11402	5.41118	-2.67296	-1.41844	2.67296	down	7.23318e-09	3.49643e-08
2743	GLRB	glycine receptor beta	7.38915	7.39067	7.46117	5.57405	5.49602	5.66511	-3.56838	-1.83527	3.56838	down	2.98492e-11	3.71589e-10
85417	CCNB3	cyclin B3	5.38635	5.52685	5.32622	4.18001	3.60952	3.83959	-2.90144	-1.53677	2.90144	down	1.7664e-07	5.88001e-07
378938	MALAT1	metastasis associated lung adenocarcinoma transcript 1 (non-protein coding)	10.6057	10.5222	10.5452	11.9507	12.0763	12.1041	2.80116	1.48602	2.80116	up	5.84163e-13	2.02763e-11
23116	FAM179B	family with sequence similarity 179 member B	5.56115	5.60051	5.67954	6.97499	7.05415	7.11381	2.70179	1.43392	2.70179	up	6.43174e-10	4.45543e-09
55668	GPATCH2L	G-patch domain containing 2 like	7.33085	7.39827	7.48613	9.42416	9.41667	9.46133	4.08113	2.02897	4.08113	up	1.34272e-13	7.35192e-12
10058	ABCB6	ATP binding cassette subfamily B member 6 (Langereis blood group)	7.66355	7.49981	7.71334	5.93562	6.06063	6.03804	-3.06128	-1.61414	3.06128	down	1.67145e-10	1.47173e-09
54800	KLHL24	kelch like family member 24	5.53735	5.18701	5.617	8.94372	8.92937	8.89261	11.1177	3.47478	11.1177	up	3.99236e-13	1.57426e-11
63905	MANBAL	mannosidase, beta A, lysosomal-like	9.40113	9.30591	9.40879	8.34705	8.17543	8.15458	-2.21339	-1.14626	2.21339	down	2.95358e-10	2.34778e-09
26020	LRP10	LDL receptor related protein 10	5.71937	5.59401	5.74252	7.57694	7.32862	7.36075	3.33296	1.7368	3.33296	up	2.44163e-10	2.00717e-09
100534599	ISY1-RAB43	ISY1-RAB43 readthrough	7.76608	7.71559	7.77135	9.14619	8.94769	9.04922	2.45665	1.29669	2.45665	up	5.70067e-11	6.1742e-10
51192	CKLF	chemokine-like factor	9.90773	9.76861	9.63634	7.87119	7.97689	8.0045	-3.53089	-1.82003	3.53089	down	7.09908e-12	1.2401e-10
23160	WDR43	WD repeat domain 43	7.9164	7.89342	7.872	9.62067	9.68143	9.68449	3.40642	1.76826	3.40642	up	8.33767e-14	5.36118e-12
10818	FRS2	fibroblast growth factor receptor substrate 2	5.70595	5.67897	5.76668	7.2326	7.05412	7.02555	2.61514	1.38689	2.61514	up	1.50298e-09	9.09724e-09
140465	MYL6B	myosin light chain 6B	9.42211	9.49182	9.52689	8.21215	8.26888	8.28737	-2.33616	-1.22414	2.33616	down	1.1096e-11	1.75689e-10
118813	ZFYVE27	zinc finger, FYVE domain containing 27	7.03188	6.98821	7.10609	8.55857	8.68218	8.60911	2.97845	1.57456	2.97845	up	8.16887e-12	1.38188e-10
6124	RPL4	ribosomal protein L4	5.09646	5.17718	5.36247	6.47583	6.44239	6.47554	2.38262	1.25255	2.38262	up	1.7377e-08	7.50985e-08
23189	KANK1	KN motif and ankyrin repeat domains 1	7.30475	7.21692	7.35404	6.20518	6.1816	6.24831	-2.11434	-1.08021	2.11434	down	4.45431e-09	2.29058e-08
7702	ZNF143	zinc finger protein 143	7.12993	7.07965	7.16384	8.55287	8.50992	8.50783	2.63731	1.39907	2.63731	up	1.06863e-11	1.70235e-10
1105	CHD1	chromodomain helicase DNA binding protein 1	8.644	8.4206	8.49647	10.1093	10.1268	10.1403	3.0422	1.60511	3.0422	up	3.10821e-12	6.69937e-11
1058	CENPA	centromere protein A	9.21044	9.25902	9.30376	5.9331	6.38842	6.18261	-8.51317	-3.0897	8.51317	down	1.03663e-12	3.023e-11
80270	HSD3B7	hydroxy-delta-5-steroid dehydrogenase, 3 beta- and steroid delta-isomerase 7	7.1963	7.38825	7.48254	6.39042	6.3145	6.27805	-2.03925	-1.02804	2.03925	down	5.00578e-08	1.90933e-07
23541	SEC14L2	SEC14-like lipid binding 2	4.00736	4.18175	4.5526	6.4368	6.33543	6.41232	4.43094	2.14761	4.43094	up	2.04555e-09	1.1835e-08
8650	NUMB	numb homolog (Drosophila)	5.73554	5.67228	5.71247	6.94371	7.11832	7.18536	2.59494	1.3757	2.59494	up	2.04899e-09	1.18497e-08
10573	MRPL28	mitochondrial ribosomal protein L28	11.0837	11.1017	11.0528	9.89264	9.71593	9.78047	-2.43355	-1.28306	2.43355	down	5.06957e-12	9.67012e-11
113235	SLC46A1	solute carrier family 46 (folate transporter), member 1	5.4052	5.33743	5.36203	4.50113	3.86347	4.47982	-2.12395	-1.08675	2.12395	down	1.60273e-05	3.70416e-05
51107	APH1A	aph-1 homolog A, gamma secretase subunit	9.28788	9.14218	9.14247	7.96342	8.14555	8.17867	-2.13608	-1.09496	2.13608	down	1.63446e-09	9.77014e-09
23272	FAM208A	family with sequence similarity 208 member A	7.76419	7.74939	7.65915	6.33752	6.5035	6.62025	-2.35733	-1.23715	2.35733	down	4.00637e-09	2.09021e-08
22992	KDM2A	lysine (K)-specific demethylase 2A	7.09126	7.04772	7.14036	8.68143	8.77353	8.82544	3.17558	1.66702	3.17558	up	3.59252e-12	7.48321e-11
6638	SNRPN	small nuclear ribonucleoprotein polypeptide N	11.1281	11.0971	11.2058	9.58371	9.58659	9.51094	-2.99648	-1.58327	2.99648	down	1.32008e-13	7.28599e-12
1033	CDKN3	cyclin-dependent kinase inhibitor 3	9.9761	10.0746	10.0041	6.00458	5.9344	5.94777	-16.6336	-4.05603	16.6336	down	5.6104e-17	6.78203e-14
9480	ONECUT2	one cut homeobox 2	5.84826	5.99467	5.85362	4.74753	4.6098	4.56809	-2.39005	-1.25704	2.39005	down	2.79741e-08	1.14357e-07
284119	PTRF	polymerase I and transcript release factor	10.4087	10.3716	10.5569	8.69151	8.73126	8.69362	-3.34099	-1.74028	3.34099	down	4.72519e-13	1.7403e-11
7559	ZNF12	zinc finger protein 12	8.82687	8.80768	8.7595	9.82018	9.86983	9.94131	2.1127	1.07909	2.1127	up	2.86744e-11	3.60988e-10
5757	PTMA	prothymosin, alpha	12.5214	12.5366	12.5402	11.4396	11.4232	11.4659	-2.12842	-1.08978	2.12842	down	2.26375e-13	1.05436e-11
2005	ELK4	ELK4, ETS-domain protein (SRF accessory protein 1)	5.20381	5.4689	5.48739	6.94169	6.94086	6.8378	2.86808	1.52008	2.86808	up	2.76057e-09	1.51979e-08
56954	NIT2	nitrilase family member 2	9.9137	9.92642	9.92768	8.84764	8.86975	8.84215	-2.09859	-1.06942	2.09859	down	4.66004e-12	9.06874e-11
23137	SMC5	structural maintenance of chromosomes 5	7.02765	7.07584	6.87759	7.86996	8.05857	8.09153	2.01809	1.01299	2.01809	up	2.41912e-08	1.00609e-07
9709	HERPUD1	homocysteine-inducible, endoplasmic reticulum stress-inducible, ubiquitin-like domain member 1	10.7391	10.7262	10.7735	11.8414	11.7931	11.7917	2.08854	1.06249	2.08854	up	9.39585e-13	2.80704e-11
23408	SIRT5	sirtuin 5	7.12927	7.08471	7.13308	5.18222	5.23563	5.24486	-3.71866	-1.89478	3.71866	down	1.89032e-11	2.6213e-10
51196	PLCE1	phospholipase C epsilon 1	8.39129	8.19323	8.11948	6.08004	6.1275	6.57608	-3.92709	-1.97346	3.92709	down	2.28136e-09	1.2969e-08
7163	TPD52	tumor protein D52	8.54729	8.57844	8.43478	5.41877	5.83967	5.81426	-7.10714	-2.82927	7.10714	down	7.70755e-12	1.31916e-10
6348	CCL3	chemokine (C-C motif) ligand 3	5.50547	5.59461	5.77973	10.8426	10.8232	10.805	36.6811	5.19697	36.6811	up	4.74067e-17	6.61612e-14
79692	ZNF322	zinc finger protein 322	6.28252	6.21976	6.35955	7.33503	7.40634	7.3136	2.09127	1.06438	2.09127	up	5.35651e-09	2.68768e-08
22888	UBOX5	U-box domain containing 5	5.80337	6.16442	5.65638	6.91077	6.83701	6.94542	2.03215	1.02301	2.03215	up	1.67775e-06	4.61117e-06
54962	TIPIN	TIMELESS interacting protein	8.75489	8.66782	8.73475	7.33386	7.40765	7.37267	-2.54517	-1.34776	2.54517	down	1.27181e-11	1.94591e-10
9878	TOX4	TOX high mobility group box family member 4	7.67667	7.60641	7.82667	8.60684	8.80446	8.78839	2.042	1.02998	2.042	up	8.62494e-09	4.07443e-08
54494	C11orf71	chromosome 11 open reading frame 71	6.91289	6.83116	6.84334	4.4516	4.7744	4.56607	-4.8069	-2.26511	4.8069	down	5.65993e-11	6.14199e-10
2070	EYA4	EYA transcriptional coactivator and phosphatase 4	5.19154	5.37108	5.31486	3.79984	4.23572	4.2195	-2.30933	-1.20747	2.30933	down	9.61829e-07	2.75917e-06
8818	DPM2	dolichyl-phosphate mannosyltransferase polypeptide 2, regulatory subunit	9.67659	9.6832	9.6587	8.30298	8.19685	8.29216	-2.65522	-1.40883	2.65522	down	1.48757e-12	3.91175e-11
641455	POTEM	POTE ankyrin domain family member M	7.22015	7.38066	7.05505	5.9352	6.14852	6.27333	-2.14296	-1.0996	2.14296	down	2.80182e-07	8.95305e-07
4140	MARK3	MAP/microtubule affinity-regulating kinase 3	9.66693	9.63314	9.73897	10.8111	10.8092	10.824	2.19631	1.13508	2.19631	up	2.70848e-12	6.03761e-11
161835	FSIP1	fibrous sheath interacting protein 1	4.2935	4.2229	4.40652	6.46146	6.84645	6.49959	4.90706	2.29486	4.90706	up	2.73523e-10	2.20797e-09
642946	FLVCR1-AS1	FLVCR1 antisense RNA 1 (head to head)	7.39967	7.29223	7.53079	5.44317	5.70225	5.73972	-3.43232	-1.77918	3.43232	down	6.70711e-10	4.61179e-09
125228	FAM210A	family with sequence similarity 210 member A	8.06702	8.12867	8.02297	9.11216	9.20123	9.24416	2.16289	1.11296	2.16289	up	1.05568e-10	1.00888e-09
56829	ZC3HAV1	zinc finger CCCH-type, antiviral 1	9.27871	9.21416	9.33182	8.11	8.21703	8.11997	-2.18237	-1.1259	2.18237	down	7.47386e-11	7.63945e-10
6447	SCG5	secretogranin V	10.2955	10.2575	10.3187	8.78169	8.87119	8.86515	-2.73436	-1.4512	2.73436	down	4.40346e-13	1.67751e-11
27	ABL2	ABL proto-oncogene 2, non-receptor tyrosine kinase	6.5118	6.46512	6.72995	8.12057	8.16509	8.17824	3.00149	1.58568	3.00149	up	1.29772e-10	1.19152e-09
4209	MEF2D	myocyte enhancer factor 2D	8.36401	8.37631	8.3308	10.4113	10.5973	10.6132	4.54265	2.18353	4.54265	up	8.45019e-14	5.40439e-12
128240	APOA1BP	apolipoprotein A-I binding protein	10.5412	10.4566	10.6657	8.50084	8.47141	8.53999	-4.14233	-2.05044	4.14233	down	1.3075e-13	7.25756e-12
627	BDNF	brain-derived neurotrophic factor	8.10088	8.02694	8.04303	6.71023	6.83066	6.92445	-2.35409	-1.23517	2.35409	down	6.69108e-10	4.60492e-09
155066	ATP6V0E2	ATPase, H+ transporting V0 subunit e2	8.01159	8.21432	8.36822	6.87196	6.65966	6.64713	-2.77366	-1.47179	2.77366	down	3.35733e-09	1.79408e-08
10400	PEMT	phosphatidylethanolamine N-methyltransferase	8.83648	8.77139	9.00209	7.02903	6.92121	6.95166	-3.73909	-1.90269	3.73909	down	4.49185e-12	8.8205e-11
28966	SNX24	sorting nexin 24	6.41334	6.39869	6.36642	4.82784	5.22822	5.2591	-2.44149	-1.28776	2.44149	down	1.48657e-07	5.04478e-07
28956	LAMTOR2	late endosomal/lysosomal adaptor, MAPK and MTOR activator 2	8.76438	8.68443	8.77814	7.71961	7.52102	7.59901	-2.18723	-1.1291	2.18723	down	5.15325e-10	3.71333e-09
151760	LOC151760	putative uncharacterized protein LOC151760	7.00203	7.10762	6.8905	3.86453	4.09865	3.9801	-8.10581	-3.01896	8.10581	down	2.37716e-12	5.46104e-11
79649	MAP7D3	MAP7 domain containing 3	8.38619	8.32548	8.37807	7.21584	7.16016	6.97927	-2.3699	-1.24482	2.3699	down	6.07679e-10	4.25332e-09
9786	KIAA0586	KIAA0586	7.60264	7.56918	7.65397	6.10059	6.21465	6.39279	-2.58934	-1.37259	2.58934	down	1.69849e-09	1.00777e-08
1139	CHRNA7	cholinergic receptor, nicotinic alpha 7	7.03595	6.66573	6.7597	5.90757	5.55362	5.59624	-2.19565	-1.13465	2.19565	down	7.39809e-07	2.16583e-06
202	AIM1	absent in melanoma 1	10.5269	10.6105	10.5687	8.96794	8.89242	8.97548	-3.08106	-1.62343	3.08106	down	1.13799e-13	6.57828e-12
64784	CRTC3	CREB regulated transcription coactivator 3	9.0474	9.05931	9.14241	10.1461	10.1446	10.1131	2.07277	1.05156	2.07277	up	1.36016e-11	2.05396e-10
116843	SLC18B1	solute carrier family 18, subfamily B, member 1	6.3112	6.20257	6.01261	4.0361	4.48719	4.42299	-3.63016	-1.86003	3.63016	down	1.12997e-08	5.14755e-08
1676	DFFA	DNA fragmentation factor, 45kDa, alpha polypeptide	8.07209	8.20912	8.26689	9.51674	9.37564	9.38313	2.36603	1.24247	2.36603	up	1.69889e-10	1.48951e-09
114898	C1QTNF2	C1q and tumor necrosis factor related protein 2	6.54958	6.05989	6.34462	3.94471	4.02016	4.20132	-4.79867	-2.26263	4.79867	down	1.13946e-09	7.17594e-09
26136	TES	testin LIM domain protein	9.30419	9.2324	9.29087	7.58976	7.86877	7.71756	-2.9291	-1.55046	2.9291	down	4.08955e-11	4.74911e-10
80315	CPEB4	cytoplasmic polyadenylation element binding protein 4	6.40859	6.35986	6.38298	8.72612	8.89288	8.91497	5.5054	2.46085	5.5054	up	1.52573e-13	7.97485e-12
55157	DARS2	aspartyl-tRNA synthetase 2, mitochondrial	9.45517	9.48871	9.38721	8.14558	8.11906	8.11906	-2.4894	-1.3158	2.4894	down	3.49107e-12	7.32655e-11
51316	PLAC8	placenta specific 8	9.28602	9.36207	9.34156	6.18809	5.87697	5.76205	-10.4651	-3.38751	10.4651	down	2.84846e-13	1.22824e-11
5427	POLE2	polymerase (DNA directed), epsilon 2, accessory subunit	9.20479	9.25566	9.09039	5.71247	5.9231	5.86891	-10.1879	-3.34879	10.1879	down	1.7062e-14	1.99025e-12
145173	B3GLCT	beta 3-glucosyltransferase	8.45074	8.36822	8.29609	7.03746	7.11928	6.91211	-2.54688	-1.34873	2.54688	down	2.84313e-10	2.27666e-09
55556	ENOSF1	enolase superfamily member 1	7.16405	7.11541	7.23778	5.4951	5.80735	5.65729	-2.86625	-1.51917	2.86625	down	1.8115e-09	1.06384e-08
767557	SYS1-DBNDD2	SYS1-DBNDD2 readthrough (NMD candidate)	5.52437	5.35161	5.50296	6.42913	6.53273	6.58905	2.08107	1.05732	2.08107	up	6.51566e-08	2.40973e-07
6857	SYT1	synaptotagmin 1	5.14239	5.26528	5.28962	3.78991	3.94722	3.70948	-2.6701	-1.41689	2.6701	down	2.18296e-08	9.17933e-08
105379283	LOC105379283	uncharacterized LOC105379283	5.15173	5.12997	5.19536	8.78621	8.7643	8.70071	12.0536	3.59139	12.0536	up	2.2456e-15	5.88936e-13
84441	MAML2	mastermind like transcriptional coactivator 2	8.46849	8.47505	8.4475	7.30484	7.43828	7.3963	-2.11972	-1.08387	2.11972	down	2.67322e-10	2.1659e-09
57679	ALS2	ALS2, alsin Rho guanine nucleotide exchange factor	5.41877	5.61864	5.53003	6.83667	6.72106	6.93587	2.47722	1.30872	2.47722	up	7.89741e-09	3.77732e-08
55199	FAM86C1	family with sequence similarity 86 member C1	8.58252	8.48433	8.54646	7.32817	6.97793	7.18587	-2.59149	-1.37378	2.59149	down	1.40719e-09	8.59734e-09
7016	TESK1	testis-specific kinase 1	8.08915	8.06114	8.32264	9.73291	9.63399	9.6305	2.84446	1.50816	2.84446	up	6.2843e-11	6.65686e-10
25913	POT1	protection of telomeres 1	4.83128	4.77581	5.10751	3.85935	3.86278	3.67597	-2.15173	-1.1055	2.15173	down	1.01397e-06	2.89873e-06
64225	ATL2	atlastin GTPase 2	4.76673	4.63626	4.75632	6.27642	6.49186	6.48469	3.24425	1.69789	3.24425	up	9.74375e-10	6.31856e-09
127544	RNF19B	ring finger protein 19B	6.55049	6.79907	6.86052	9.54605	9.43645	9.46834	6.71282	2.74692	6.71282	up	3.05379e-13	1.30134e-11
2535	FZD2	frizzled class receptor 2	9.95362	9.96491	10.0962	8.04876	7.93835	7.9948	-4.03045	-2.01094	4.03045	down	1.31827e-13	7.28599e-12
28996	HIPK2	homeodomain interacting protein kinase 2	7.37639	7.32919	7.41322	8.73658	8.69408	8.77132	2.56874	1.36106	2.56874	up	1.07188e-11	1.70683e-10
8266	UBL4A	ubiquitin like 4A	8.40458	8.31323	8.37463	7.12839	7.18837	7.19318	-2.28813	-1.19417	2.28813	down	9.22541e-11	9.07021e-10
9873	FCHSD2	FCH and double SH3 domains 2	5.53558	5.5095	5.71482	6.75778	6.74619	6.79264	2.26405	1.1789	2.26405	up	1.18747e-08	5.37137e-08
10056	FARSB	phenylalanyl-tRNA synthetase beta subunit	9.74738	9.70317	9.73422	8.73505	8.71517	8.7189	-2.00724	-1.00522	2.00724	down	1.45847e-11	2.15473e-10
9262	STK17B	serine/threonine kinase 17b	6.25301	6.2779	6.22349	7.22819	7.36514	7.26465	2.04844	1.03453	2.04844	up	6.71753e-09	3.28029e-08
4709	NDUFB3	NADH:ubiquinone oxidoreductase subunit B3	12.2802	12.1845	12.125	11.1362	11.0959	11.1149	-2.11539	-1.08093	2.11539	down	8.55807e-12	1.43529e-10
10160	FARP1	FERM, ARH/RhoGEF and pleckstrin domain protein 1	9.56902	9.58721	9.62642	8.59857	8.56158	8.56016	-2.02902	-1.02078	2.02902	down	2.10255e-11	2.85085e-10
81502	HM13	histocompatibility (minor) 13	5.34264	5.38728	5.51367	6.65022	6.50874	6.71465	2.31339	1.21001	2.31339	up	1.92299e-08	8.20985e-08
145165	ST13P4	suppression of tumorigenicity 13 (colon carcinoma) (Hsp70 interacting protein) pseudogene 4	9.43724	9.21386	9.11225	10.0428	10.4253	10.4857	2.08995	1.06347	2.08995	up	4.7099e-07	1.4334e-06
7443	VRK1	vaccinia related kinase 1	8.39895	8.29041	8.06199	6.38982	6.46927	6.52342	-3.45722	-1.78961	3.45722	down	1.33682e-10	1.22111e-09
65998	C11orf95	chromosome 11 open reading frame 95	8.03629	8.01719	8.07667	9.71814	9.80152	9.84172	3.34903	1.74374	3.34903	up	2.17446e-13	1.0255e-11
92667	MGME1	mitochondrial genome maintenance exonuclease 1	9.82439	9.86525	9.78612	8.60691	8.61272	8.54381	-2.3578	-1.23744	2.3578	down	3.73989e-12	7.68754e-11
404550	C16orf74	chromosome 16 open reading frame 74	6.97722	6.935	6.96924	5.99477	5.82893	5.92184	-2.06381	-1.04531	2.06381	down	1.49761e-08	6.5807e-08
138050	HGSNAT	heparan-alpha-glucosaminide N-acetyltransferase	7.15247	7.16816	7.16816	4.0879	4.63626	4.79124	-6.31069	-2.6578	6.31069	down	9.32423e-10	6.09099e-09
80224	NUBPL	nucleotide binding protein-like	6.11808	5.89038	5.24528	3.9498	4.27346	4.4422	-2.88671	-1.52943	2.88671	down	6.74939e-06	1.66464e-05
9825	SPATA2	spermatogenesis associated 2	5.80493	5.73848	5.80875	7.14511	7.08677	7.02169	2.46309	1.30047	2.46309	up	1.07539e-09	6.83743e-09
79772	MCTP1	multiple C2 domains, transmembrane 1	7.3286	7.32359	7.42317	8.78529	8.84044	8.77687	2.71775	1.44241	2.71775	up	6.85818e-12	1.20883e-10
2123	EVI2A	ecotropic viral integration site 2A	6.93409	6.77149	6.56673	4.94297	4.69978	4.73228	-3.90618	-1.96576	3.90618	down	1.01251e-09	6.51395e-09
23186	RCOR1	REST corepressor 1	5.15536	4.99448	4.80421	6.35759	6.27556	6.10365	2.39648	1.26092	2.39648	up	1.24223e-07	4.28519e-07
3017	HIST1H2BD	histone cluster 1, H2bd	6.81044	6.82705	6.87074	5.49252	5.06484	5.2421	-2.9682	-1.56959	2.9682	down	7.19457e-09	3.47905e-08
1523	CUX1	cut-like homeobox 1	8.21509	8.0878	8.00811	9.20543	9.34318	9.40804	2.32176	1.21522	2.32176	up	5.74676e-10	4.06749e-09
399512	SLC25A35	solute carrier family 25, member 35	6.46139	6.50683	6.42295	5.23078	5.04146	5.14234	-2.50625	-1.32553	2.50625	down	5.09542e-09	2.5722e-08
116092	DNTTIP1	deoxynucleotidyltransferase, terminal, interacting protein 1	8.38239	8.36761	8.3617	9.37952	9.42514	9.34081	2.01567	1.01126	2.01567	up	4.14016e-11	4.79221e-10
6427	SRSF2	serine/arginine-rich splicing factor 2	7.49353	7.30085	7.19916	8.85966	8.57633	8.73392	2.62465	1.39212	2.62465	up	2.46235e-09	1.38229e-08
92675	DTD1	D-tyrosyl-tRNA deacylase 1	9.81127	9.78207	9.8349	8.54177	8.53727	8.59918	-2.37843	-1.25001	2.37843	down	2.23605e-12	5.23536e-11
5306	PITPNA	phosphatidylinositol transfer protein alpha	7.96961	7.88733	7.90656	8.99197	9.12063	9.08105	2.20898	1.14338	2.20898	up	7.15573e-11	7.39552e-10
124997	WDR81	WD repeat domain 81	6.59741	6.78351	6.83012	7.86395	7.71276	7.66971	2.01642	1.01179	2.01642	up	3.67399e-08	1.45401e-07
3481	IGF2	insulin like growth factor 2	4.0862	4.13757	3.90659	5.92807	6.00675	6.03913	3.85803	1.94786	3.85803	up	3.45867e-10	2.67315e-09
9088	PKMYT1	protein kinase, membrane associated tyrosine/threonine 1	8.93988	9.10923	9.01384	7.54124	6.98984	7.10912	-3.50055	-1.80758	3.50055	down	3.29995e-09	1.76865e-08
7168	TPM1	tropomyosin 1 (alpha)	8.52131	8.45853	8.58834	5.67068	6.02796	5.9185	-6.27818	-2.65035	6.27818	down	2.63771e-12	5.9306e-11
49854	ZBTB21	zinc finger and BTB domain containing 21	5.52969	5.16706	5.64031	6.95044	7.1676	7.12358	3.10556	1.63485	3.10556	up	1.51415e-08	6.64251e-08
89832	CHRFAM7A	CHRNA7 (cholinergic receptor, nicotinic, alpha 7, exons 5-10) and FAM7A (family with sequence similarity 7A, exons A-E) fusion	7.03595	6.66573	6.7597	5.90757	5.55362	5.59624	-2.19565	-1.13465	2.19565	down	7.39809e-07	2.16583e-06
65990	FAM173A	family with sequence similarity 173 member A	9.29432	9.23837	9.32551	7.13909	7.14789	7.29797	-4.26068	-2.09108	4.26068	down	2.65235e-13	1.1685e-11
80777	CYB5B	cytochrome b5 type B (outer mitochondrial membrane)	5.78993	5.81202	5.73128	4.54846	4.63626	4.38083	-2.38815	-1.25589	2.38815	down	3.91824e-08	1.53759e-07
3337	DNAJB1	DnaJ heat shock protein family (Hsp40) member B1	10.3471	10.1913	10.2237	11.7712	11.8349	11.8357	2.9483	1.55988	2.9483	up	3.31152e-13	1.38671e-11
64762	GAREM1	GRB2 associated regulator of MAPK1 subtype 1	5.52688	5.7374	5.90533	6.94304	6.79958	6.8727	2.21694	1.14857	2.21694	up	1.10444e-07	3.85478e-07
2582	GALE	UDP-galactose-4-epimerase	9.69075	9.72692	9.75408	8.49354	8.61029	8.49461	-2.28327	-1.1911	2.28327	down	1.48817e-11	2.18538e-10
64410	KLHL25	kelch like family member 25	5.08463	5.00047	5.06077	6.00812	6.09902	6.06746	2.01332	1.00958	2.01332	up	8.18001e-08	2.95098e-07
2876	GPX1	glutathione peroxidase 1	11.2324	11.1715	11.3943	8.67298	8.37655	8.47344	-6.7665	-2.75841	6.7665	down	2.14022e-13	1.01445e-11
6941	TCF19	transcription factor 19	8.74864	8.70796	8.67208	5.88141	5.91966	5.82016	-7.13947	-2.83582	7.13947	down	1.69696e-14	1.99025e-12
79590	MRPL24	mitochondrial ribosomal protein L24	10.6457	10.5816	10.6531	9.17819	9.17933	9.21621	-2.70485	-1.43555	2.70485	down	1.73859e-13	8.76629e-12
2030	SLC29A1	solute carrier family 29 (equilibrative nucleoside transporter), member 1	8.85893	8.75523	8.78726	7.70461	7.63058	7.59141	-2.2319	-1.15827	2.2319	down	9.5811e-11	9.33668e-10
4354	MPP1	membrane protein, palmitoylated 1	9.7508	9.84613	9.80677	8.57184	8.42024	8.50852	-2.46405	-1.30103	2.46405	down	1.13195e-11	1.78576e-10
9119	KRT75	keratin 75, type II	9.46742	9.35781	9.4357	7.76973	7.712	7.67949	-3.24879	-1.6999	3.24879	down	5.5322e-13	1.95286e-11
201965	RWDD4	RWD domain containing 4	7.83455	8.04393	7.88875	6.62745	7.0055	6.90941	-2.10666	-1.07496	2.10666	down	1.29927e-07	4.46188e-07
7761	ZNF214	zinc finger protein 214	4.9619	4.68609	4.59908	3.76444	3.67253	3.78703	-2.01069	-1.00769	2.01069	down	2.38986e-06	6.37988e-06
7461	CLIP2	CAP-Gly domain containing linker protein 2	7.73653	7.69215	7.80795	9.24421	9.23825	9.2358	2.81645	1.49388	2.81645	up	1.63456e-12	4.17474e-11
7975	MAFK	v-maf avian musculoaponeurotic fibrosarcoma oncogene homolog K	8.79282	8.67516	8.8809	10.8809	10.715	10.7904	4.03472	2.01247	4.03472	up	4.41302e-13	1.67751e-11
54516	MTRF1L	mitochondrial translational release factor 1 like	5.51774	5.33585	5.67274	6.91466	6.80292	6.86783	2.55447	1.35303	2.55447	up	1.15336e-08	5.23945e-08
81628	TSC22D4	TSC22 domain family member 4	4.63626	4.79989	4.54591	6.153	5.99844	6.24338	2.77199	1.47092	2.77199	up	1.23617e-08	5.56263e-08
6497	SKI	SKI proto-oncogene	4.27146	4.66952	4.48103	5.64095	5.68841	5.85739	2.38653	1.25491	2.38653	up	2.52811e-07	8.15039e-07
84060	RBM48	RNA binding motif protein 48	6.09359	6.26076	6.3088	7.6861	7.70246	7.77511	2.82877	1.50017	2.82877	up	2.31317e-10	1.92446e-09
730092	RRN3P1	RRN3 homolog, RNA polymerase I transcription factor pseudogene 1	6.82025	6.93375	6.79588	8.26713	8.20944	8.23408	2.6152	1.38692	2.6152	up	4.91834e-11	5.47561e-10
11057	ABHD2	abhydrolase domain containing 2	7.08609	7.0388	7.18183	9.3918	9.37978	9.37399	4.85549	2.27962	4.85549	up	3.54731e-14	3.10108e-12
10426	TUBGCP3	tubulin, gamma complex associated protein 3	8.16897	8.08755	8.16663	7.02903	6.94356	7.01336	-2.21259	-1.14573	2.21259	down	2.69612e-10	2.18129e-09
836	CASP3	caspase 3	8.18254	8.08623	8.07508	9.23889	9.27842	9.39506	2.28075	1.18951	2.28075	up	8.61219e-11	8.57423e-10
158931	TCEAL6	transcription elongation factor A (SII)-like 6	10.2092	10.1705	10.1807	8.88319	8.79536	8.81786	-2.5573	-1.35462	2.5573	down	7.01964e-13	2.28589e-11
11274	USP18	ubiquitin specific peptidase 18	6.6275	6.13191	6.02627	5.22521	5.27247	5.13587	-2.07155	-1.05071	2.07155	down	7.65773e-06	1.86944e-05
8733	GPAA1	glycosylphosphatidylinositol anchor attachment 1	9.04267	9.24021	9.35931	7.7528	7.50119	7.54228	-3.06377	-1.61531	3.06377	down	4.08798e-10	3.06438e-09
220002	CYB561A3	cytochrome b561 family member A3	8.73001	8.78198	8.83102	7.48285	7.32442	7.41294	-2.59236	-1.37427	2.59236	down	3.15662e-11	3.88263e-10
55061	SUSD4	sushi domain containing 4	5.62447	5.6622	5.88611	4.69493	4.73188	4.72774	-2.00844	-1.00608	2.00844	down	4.29605e-07	1.31761e-06
147929	ZNF565	zinc finger protein 565	5.17099	5.27411	5.20949	6.17751	6.30637	6.24403	2.03417	1.02444	2.03417	up	6.73259e-08	2.48151e-07
221078	NSUN6	NOP2/Sun RNA methyltransferase family member 6	8.29339	8.25169	8.2201	6.07821	6.20493	6.35202	-4.12199	-2.04334	4.12199	down	8.29275e-12	1.3986e-10
1936	EEF1D	eukaryotic translation elongation factor 1 delta (guanine nucleotide exchange protein)	5.03795	5.3065	4.88145	6.59206	6.4944	6.62406	2.81839	1.49487	2.81839	up	1.90669e-08	8.15271e-08
153768	PRELID2	PRELI domain containing 2	7.50331	7.56457	7.51556	5.77505	6.07842	5.98305	-2.99448	-1.58231	2.99448	down	5.43024e-10	3.88001e-09
170394	PWWP2B	PWWP domain containing 2B	6.3945	6.39785	6.58426	7.25621	7.64385	7.56179	2.03978	1.02841	2.03978	up	3.69715e-07	1.14853e-06
26156	RSL1D1	ribosomal L1 domain containing 1	6.52348	6.38824	6.66683	9.18974	8.96624	9.15272	5.9658	2.57672	5.9658	up	1.25999e-12	3.46288e-11
10102	TSFM	Ts translation elongation factor, mitochondrial	5.16742	5.29605	5.21169	4.28443	4.18266	4.07017	-2.06475	-1.04597	2.06475	down	3.55738e-07	1.11014e-06
790	CAD	carbamoyl-phosphate synthetase 2, aspartate transcarbamylase, and dihydroorotase	9.81917	9.79646	9.72753	8.46028	8.29634	8.24637	-2.72588	-1.44672	2.72588	down	1.80982e-11	2.5385e-10
23500	DAAM2	dishevelled associated activator of morphogenesis 2	6.53647	6.43472	6.73386	5.11609	5.17258	5.13024	-2.69207	-1.42871	2.69207	down	5.84826e-09	2.902e-08
83540	NUF2	NUF2, NDC80 kinetochore complex component	7.90781	7.90237	7.81189	4.47766	4.61266	4.82542	-9.41815	-3.23544	9.41815	down	6.89374e-13	2.25996e-11
55789	DEPDC1B	DEP domain containing 1B	8.98437	9.14626	8.99364	5.34295	5.80862	5.6357	-10.8955	-3.44567	10.8955	down	7.87347e-13	2.48523e-11
259230	SGMS1	sphingomyelin synthase 1	7.51285	7.47642	7.41413	6.07417	6.23641	6.21092	-2.45201	-1.29397	2.45201	down	8.87387e-10	5.84073e-09
84640	USP38	ubiquitin specific peptidase 38	3.5422	3.67253	3.81633	5.94099	6.41625	6.60637	6.25142	2.64418	6.25142	up	1.48329e-09	8.992e-09
5332	PLCB4	phospholipase C beta 4	7.23459	7.36137	7.23542	4.45427	3.8731	4.04566	-8.8937	-3.15278	8.8937	down	3.67666e-11	4.37893e-10
55568	GALNT10	polypeptide N-acetylgalactosaminyltransferase 10	8.58126	8.64948	8.71257	7.45851	7.45843	7.41782	-2.30194	-1.20285	2.30194	down	6.46347e-11	6.79691e-10
152110	NEK10	NIMA-related kinase 10	3.7256	3.87655	3.60902	4.61468	4.83885	4.97579	2.10339	1.07272	2.10339	up	2.01568e-06	5.45588e-06
55146	ZDHHC4	zinc finger, DHHC-type containing 4	9.96645	9.92241	9.94683	8.17932	8.04648	8.15575	-3.52603	-1.81805	3.52603	down	1.37534e-13	7.46444e-12
57697	FANCM	Fanconi anemia complementation group M	6.93212	6.82836	6.75864	4.75816	5.3123	5.15864	-3.39483	-1.76334	3.39483	down	1.60525e-08	7.00328e-08
30846	EHD2	EH domain containing 2	6.64664	6.43973	6.65485	5.27336	5.29485	5.45388	-2.36151	-1.23971	2.36151	down	2.47279e-08	1.02502e-07
2650	GCNT1	glucosaminyl (N-acetyl) transferase 1, core 2	7.83269	7.64304	7.54134	4.15997	4.24295	4.38791	-10.6203	-3.40875	10.6203	down	6.24828e-13	2.11636e-11
57106	NAT14	N-acetyltransferase 14 (GCN5-related, putative)	8.39574	8.26521	8.45537	5.6337	5.64919	5.72602	-6.50915	-2.70247	6.50915	down	1.81486e-13	9.01845e-12
56474	CTPS2	CTP synthase 2	7.16279	7.22254	7.35355	5.61774	5.78308	5.60023	-2.9882	-1.57928	2.9882	down	5.31269e-10	3.80855e-09
79801	SHCBP1	SHC SH2-domain binding protein 1	9.44184	9.44826	9.25382	6.52335	6.71864	6.54215	-6.89999	-2.78659	6.89999	down	1.34831e-13	7.36895e-12
4692	NDN	necdin, MAGE family member	9.21696	9.1158	9.16934	7.36557	7.58347	7.51402	-3.20357	-1.67968	3.20357	down	7.42499e-12	1.28725e-10
150094	SIK1	salt inducible kinase 1	8.47479	8.49135	8.57907	10.2189	10.2826	10.2968	3.36599	1.75103	3.36599	up	1.08029e-13	6.35687e-12
25766	PRPF40B	pre-mRNA processing factor 40 homolog B	6.39991	6.72371	6.88174	5.39748	5.57805	5.28184	-2.37731	-1.24933	2.37731	down	4.53857e-07	1.38558e-06
64839	FBXL17	F-box and leucine-rich repeat protein 17	5.75806	5.52201	5.76868	6.49226	6.77272	6.79535	2.00536	1.00386	2.00536	up	7.69795e-07	2.24655e-06
51593	SRRT	serrate, RNA effector molecule	6.27099	6.07348	6.25476	7.45239	7.3817	7.34821	2.28843	1.19436	2.28843	up	3.94785e-09	2.06459e-08
1029	CDKN2A	cyclin-dependent kinase inhibitor 2A	8.76084	8.91935	8.98897	7.31661	7.12536	7.07812	-3.28606	-1.71636	3.28606	down	6.42331e-11	6.76925e-10
25871	C3orf17	chromosome 3 open reading frame 17	7.78709	7.77482	7.73688	9.06996	9.15352	9.16243	2.57108	1.36237	2.57108	up	4.84938e-12	9.33955e-11
5271	SERPINB8	serpin peptidase inhibitor, clade B (ovalbumin), member 8	8.10228	8.13633	8.1778	9.49899	9.44354	9.35738	2.45292	1.2945	2.45292	up	1.23814e-11	1.90859e-10
9066	SYT7	synaptotagmin VII	6.64101	6.40921	6.66373	8.50397	8.4722	8.43396	3.72884	1.89873	3.72884	up	1.3715e-11	2.06289e-10
3613	IMPA2	inositol(myo)-1(or 4)-monophosphatase 2	7.3189	7.27648	7.31384	5.69961	5.41881	5.58965	-3.32584	-1.73372	3.32584	down	2.0958e-10	1.76923e-09
8031	NCOA4	nuclear receptor coactivator 4	8.72201	8.58221	8.66749	9.6446	9.73094	9.76538	2.07974	1.0564	2.07974	up	1.3929e-10	1.26201e-09
26505	CNNM3	cyclin and CBS domain divalent metal cation transport mediator 3	6.51315	6.30537	6.63413	7.88192	7.83156	7.79057	2.54995	1.35047	2.54995	up	2.62955e-09	1.45855e-08
26973	CHORDC1	cysteine and histidine rich domain containing 1	4.80448	5.13981	5.01166	6.38166	6.42947	6.4483	2.70287	1.43449	2.70287	up	1.01185e-08	4.67707e-08
25911	DPCD	deleted in primary ciliary dyskinesia homolog (mouse)	8.65507	8.47538	8.7488	7.22819	7.08312	7.00608	-2.86914	-1.52062	2.86914	down	3.84132e-10	2.91074e-09
25974	MMACHC	methylmalonic aciduria (cobalamin deficiency) cblC type, with homocystinuria	7.00175	7.07531	6.98124	5.18567	5.7356	5.61884	-2.84034	-1.50606	2.84034	down	6.15406e-08	2.29162e-07
339804	C2orf74	chromosome 2 open reading frame 74	8.23344	8.1895	8.10557	5.78403	5.83478	6.00793	-4.92659	-2.30059	4.92659	down	2.38803e-12	5.47669e-11
23256	SCFD1	sec1 family domain containing 1	8.36579	8.34783	8.28864	6.80866	7.04849	7.10344	-2.54422	-1.34722	2.54422	down	9.84962e-10	6.36925e-09
100529251	CKLF-CMTM1	CKLF-CMTM1 readthrough	9.90773	9.76861	9.63634	7.87119	7.97689	8.0045	-3.53089	-1.82003	3.53089	down	7.09908e-12	1.2401e-10
55215	FANCI	Fanconi anemia complementation group I	8.95323	8.84582	8.98361	6.65023	6.92213	6.81377	-4.38378	-2.13218	4.38378	down	3.36902e-12	7.11629e-11
4040	LRP6	LDL receptor related protein 6	4.73236	5.0689	5.15645	6.18134	5.97685	6.18854	2.18809	1.12967	2.18809	up	9.04052e-07	2.60586e-06
79664	ICE2	interactor of little elongation complex ELL subunit 2	7.25112	7.19385	7.11654	5.74422	5.99852	6.1245	-2.34799	-1.23142	2.34799	down	4.02376e-08	1.57362e-07
56256	SERTAD4	SERTA domain containing 4	8.58098	8.59778	8.50273	5.59246	5.27525	5.09953	-9.4354	-3.23808	9.4354	down	2.39864e-12	5.49208e-11
55861	DBNDD2	dysbindin (dystrobrevin binding protein 1) domain containing 2	5.52437	5.35161	5.50296	6.42913	6.53273	6.58905	2.08107	1.05732	2.08107	up	6.51566e-08	2.40973e-07
9448	MAP4K4	mitogen-activated protein kinase kinase kinase kinase 4	9.0464	9.08362	9.0595	11.309	11.4387	11.3505	4.93443	2.30288	4.93443	up	1.8679e-15	5.25123e-13
6430	SRSF5	serine/arginine-rich splicing factor 5	4.79925	4.72452	5.02628	6.03528	6.15415	5.97633	2.30575	1.20524	2.30575	up	1.05977e-07	3.71512e-07
6925	TCF4	transcription factor 4	8.0363	8.05774	8.02559	6.80485	6.81219	6.81865	-2.34239	-1.22798	2.34239	down	7.83282e-11	7.93167e-10
57670	KIAA1549	KIAA1549	5.44691	5.26053	5.46037	6.63923	6.58472	6.70655	2.3854	1.25423	2.3854	up	1.04248e-08	4.79597e-08
404734	ANKHD1-EIF4EBP3	ANKHD1-EIF4EBP3 readthrough	6.73758	6.77973	6.7388	7.71717	7.73927	7.8136	2.00645	1.00464	2.00645	up	1.98432e-09	1.152e-08
23549	DNPEP	aspartyl aminopeptidase	5.70718	5.4075	5.71163	6.31967	6.8675	6.85094	2.10031	1.0706	2.10031	up	8.96568e-06	2.16681e-05
144406	WDR66	WD repeat domain 66	7.43589	7.4493	7.39875	6.21208	6.26308	6.21208	-2.29565	-1.1989	2.29565	down	6.19728e-10	4.32294e-09
8661	EIF3A	eukaryotic translation initiation factor 3 subunit A	10.2279	10.1878	10.2231	11.3913	11.3769	11.436	2.27917	1.18851	2.27917	up	4.07695e-13	1.59634e-11
10395	DLC1	DLC1 Rho GTPase activating protein	10.1819	10.1279	10.1948	8.67984	8.69567	8.63971	-2.82145	-1.49644	2.82145	down	2.17817e-13	1.0255e-11
10585	POMT1	protein-O-mannosyltransferase 1	8.987	8.95595	9.10906	8.08501	8.00465	7.87037	-2.04296	-1.03066	2.04296	down	2.57982e-09	1.43688e-08
23705	CADM1	cell adhesion molecule 1	6.63142	6.6999	6.50496	4.18001	4.98918	4.98123	-3.71996	-1.89529	3.71996	down	3.16446e-07	9.9893e-07
26577	PCOLCE2	procollagen C-endopeptidase enhancer 2	6.90691	6.89099	6.99941	5.28388	5.41377	5.74177	-2.73707	-1.45263	2.73707	down	2.72927e-08	1.11829e-07
9731	CEP104	centrosomal protein 104kDa	7.2245	7.15403	7.21067	8.34833	8.21173	8.19505	2.07816	1.0553	2.07816	up	1.09264e-09	6.93245e-09
113146	AHNAK2	AHNAK nucleoprotein 2	8.50062	8.38338	8.40352	6.10823	6.04733	6.19507	-4.96673	-2.3123	4.96673	down	4.52654e-13	1.71048e-11
11218	DDX20	DEAD (Asp-Glu-Ala-Asp) box polypeptide 20	7.37768	7.34553	7.41341	8.39365	8.39452	8.36075	2.00569	1.0041	2.00569	up	3.12318e-10	2.45563e-09
4929	NR4A2	nuclear receptor subfamily 4 group A member 2	4.46442	4.313	4.31151	6.28399	6.43043	6.63035	4.24357	2.08528	4.24357	up	3.65929e-10	2.79558e-09
4204	MECP2	methyl-CpG binding protein 2	6.85315	6.7852	6.94585	8.1091	8.11427	8.16088	2.40608	1.26668	2.40608	up	1.82916e-10	1.58523e-09
100527950	GJA9-MYCBP	GJA9-MYCBP readthrough	8.28081	8.2131	8.00959	6.96818	6.99341	7.05528	-2.238	-1.16221	2.238	down	3.37901e-09	1.80385e-08
7150	TOP1	topoisomerase (DNA) I	7.7615	7.56466	7.64579	8.68784	8.80102	8.81101	2.15742	1.10931	2.15742	up	8.37708e-10	5.57288e-09
100034743	PDZK1P1	PDZ domain containing 1 pseudogene 1	3.78313	3.66949	3.76583	5.88145	6.06175	6.10984	4.85071	2.2782	4.85071	up	7.00352e-11	7.26125e-10
85012	TCEAL3	transcription elongation factor A (SII)-like 3	10.2092	10.1705	10.1807	8.88319	8.79536	8.81786	-2.5573	-1.35462	2.5573	down	7.01964e-13	2.28589e-11
100528022	BLOC1S1-RDH5	BLOC1S1-RDH5 readthrough	6.87015	6.87872	7.19828	5.80272	5.57883	5.27093	-2.69738	-1.43156	2.69738	down	2.241e-07	7.31348e-07
3978	LIG1	ligase I, DNA, ATP-dependent	8.60426	8.74149	8.89907	6.7705	6.63765	6.64094	-4.18505	-2.06524	4.18505	down	8.79382e-12	1.4654e-10
1846	DUSP4	dual specificity phosphatase 4	6.58931	6.70217	6.69703	8.80348	8.83047	8.91547	4.55348	2.18697	4.55348	up	2.27831e-13	1.05862e-11
57446	NDRG3	NDRG family member 3	9.30138	9.29323	9.34696	8.23299	8.12687	8.12206	-2.22409	-1.15322	2.22409	down	2.99829e-11	3.72897e-10
9212	AURKB	aurora kinase B	9.82697	9.81678	9.86152	7.86996	7.98737	7.88254	-3.78895	-1.9218	3.78895	down	7.18924e-14	4.91143e-12
2186	BPTF	bromodomain PHD finger transcription factor	7.79016	7.73201	7.70759	8.7463	8.89863	8.93179	2.16693	1.11565	2.16693	up	4.12391e-10	3.08362e-09
3659	IRF1	interferon regulatory factor 1	5.45183	5.97316	5.86982	7.32691	7.33972	7.35107	2.9779	1.5743	2.9779	up	1.94254e-08	8.28156e-08
3073	HEXA	hexosaminidase A (alpha polypeptide)	5.82874	5.76717	6.02768	7.27836	7.12178	7.15374	2.47958	1.3101	2.47958	up	6.18569e-09	3.05238e-08
79738	BBS10	Bardet-Biedl syndrome 10	6.74605	6.58165	6.75911	4.5271	4.63389	4.61135	-4.30145	-2.10482	4.30145	down	4.53732e-11	5.14523e-10
5747	PTK2	protein tyrosine kinase 2	7.51132	7.49035	7.43515	8.74373	8.74377	8.7949	2.43152	1.28186	2.43152	up	1.46783e-11	2.16365e-10
653784	MZT2A	mitotic spindle organizing protein 2A	8.70021	8.66524	8.72663	7.1271	7.2754	7.34615	-2.72794	-1.44781	2.72794	down	4.97234e-11	5.53258e-10
8574	AKR7A2	aldo-keto reductase family 7, member A2	10.3994	10.4239	10.4975	9.1642	9.10605	9.09363	-2.4949	-1.31898	2.4949	down	1.26102e-12	3.46288e-11
3070	HELLS	helicase, lymphoid-specific	7.62784	7.62759	7.66995	4.61356	4.86699	5.0247	-6.99687	-2.80671	6.99687	down	7.0105e-12	1.22957e-10
11258	DCTN3	dynactin subunit 3	10.6325	10.6307	10.7075	9.66745	9.57012	9.62167	-2.05223	-1.03719	2.05223	down	1.48206e-11	2.17888e-10
283417	DPY19L2	dpy-19-like 2 (C. elegans)	5.85113	5.88136	5.73972	4.46241	4.56934	4.46319	-2.50664	-1.32576	2.50664	down	1.13683e-08	5.174e-08
9644	SH3PXD2A	SH3 and PX domains 2A	8.05936	8.14069	8.17488	9.90234	9.96372	9.91771	3.48932	1.80295	3.48932	up	1.13024e-13	6.55121e-12
221294	NT5DC1	5'-nucleotidase domain containing 1	7.88206	7.78576	7.68759	5.41877	5.53437	5.53437	-4.88819	-2.2893	4.88819	down	3.23478e-12	6.89609e-11
56681	SAR1A	secretion associated, Ras related GTPase 1A	9.04968	8.96457	9.00727	10.1183	10.2126	10.1943	2.24683	1.16789	2.24683	up	6.97837e-12	1.22449e-10
5292	PIM1	Pim-1 proto-oncogene, serine/threonine kinase	6.99903	7.08799	6.8984	8.39171	8.64211	8.69598	2.99273	1.58146	2.99273	up	3.76992e-10	2.86902e-09
26984	SEC22A	SEC22 homolog A, vesicle trafficking protein	6.17308	5.98033	6.07604	4.94122	4.85602	5.01215	-2.20384	-1.14002	2.20384	down	5.84913e-08	2.19143e-07
7625	ZNF74	zinc finger protein 74	5.71757	5.57407	5.8007	6.83053	6.73813	6.7617	2.11307	1.07934	2.11307	up	3.45306e-08	1.37731e-07
1992	SERPINB1	serpin peptidase inhibitor, clade B (ovalbumin), member 1	8.61357	8.61128	8.64459	7.25023	7.33432	7.32156	-2.49858	-1.32111	2.49858	down	1.47057e-11	2.16687e-10
23596	OPN3	opsin 3	7.52136	7.51393	7.64835	6.53041	6.40344	6.34377	-2.1967	-1.13534	2.1967	down	4.78414e-09	2.43521e-08
54957	TXNL4B	thioredoxin like 4B	6.90157	6.80122	6.94639	8.46549	8.30743	8.32717	2.79653	1.48364	2.79653	up	6.10916e-11	6.51727e-10
51251	NT5C3A	5'-nucleotidase, cytosolic IIIA	10.0383	10.0313	9.97988	11.1259	11.1477	11.1623	2.18679	1.12882	2.18679	up	8.8086e-13	2.68288e-11
794	CALB2	calbindin 2	6.84174	6.54167	6.67884	4.94408	5.06499	5.15106	-3.10381	-1.63404	3.10381	down	2.47263e-09	1.38647e-08
55355	HJURP	Holliday junction recognition protein	9.90935	9.94582	9.96736	7.51341	7.66637	7.50599	-5.20147	-2.37892	5.20147	down	2.44299e-14	2.41132e-12
718	C3	complement component 3	4.05183	3.73815	4.1816	6.82667	6.7389	6.67577	6.75795	2.75659	6.75795	up	4.59158e-11	5.1902e-10
1316	KLF6	Kruppel-like factor 6	9.07144	9.12232	9.19886	10.1375	10.1601	10.17	2.03502	1.02504	2.03502	up	2.95707e-11	3.69047e-10
1022	CDK7	cyclin-dependent kinase 7	9.67293	9.6131	9.66152	10.7146	10.6912	10.7185	2.08337	1.05892	2.08337	up	2.68016e-12	5.99499e-11
574	BAGE	B melanoma antigen	6.51934	6.33809	6.41301	5.04011	5.26366	5.21338	-2.38022	-1.2511	2.38022	down	2.3402e-08	9.76696e-08
64116	SLC39A8	solute carrier family 39 (zinc transporter), member 8	8.40561	8.44426	8.43923	7.27252	7.42633	7.40798	-2.08603	-1.06076	2.08603	down	6.18479e-10	4.315e-09
23210	JMJD6	jumonji domain containing 6	8.34976	8.34807	8.49413	10.3991	10.2752	10.2452	3.75596	1.90918	3.75596	up	4.76424e-13	1.74809e-11
100131017	ZNF316	zinc finger protein 316	7.82901	7.95066	7.81173	9.3048	9.19556	9.16795	2.56502	1.35897	2.56502	up	2.87559e-11	3.61722e-10
57234	LINC00869	long intergenic non-protein coding RNA 869	8.99061	9.09483	8.9835	9.95329	10.2332	10.1899	2.14725	1.10249	2.14725	up	2.07645e-09	1.19925e-08
3572	IL6ST	interleukin 6 signal transducer	5.9524	5.81045	5.99358	7.61611	7.55034	7.59345	3.17735	1.66782	3.17735	up	6.13565e-11	6.53305e-10
9413	FAM189A2	family with sequence similarity 189 member A2	5.25771	5.0849	5.19536	6.31739	6.46104	6.49881	2.37253	1.24642	2.37253	up	1.63809e-08	7.12588e-08
353	APRT	adenine phosphoribosyltransferase	10.6012	10.5967	10.7271	9.56437	9.64755	9.63949	-2.03431	-1.02454	2.03431	down	5.74306e-11	6.21322e-10
84304	NUDT22	nudix hydrolase 22	8.1464	8.21481	8.32813	7.16359	7.12658	7.11001	-2.13818	-1.09639	2.13818	down	8.78077e-10	5.79049e-09
84276	NICN1	nicolin 1	7.00677	7.1019	7.03802	5.24021	5.13722	5.25256	-3.57737	-1.8389	3.57737	down	4.75678e-11	5.33221e-10
3221	HOXC4	homeobox C4	6.58568	6.75822	6.873	5.91419	5.48062	5.49965	-2.15469	-1.10748	2.15469	down	1.31841e-06	3.68707e-06
54749	EPDR1	ependymin related 1	10.8167	10.8482	10.8134	9.31226	9.25921	9.19675	-2.96903	-1.56999	2.96903	down	1.15159e-13	6.61851e-12
137994	LETM2	leucine zipper-EF-hand containing transmembrane protein 2	9.45027	9.42573	9.4986	7.97317	8.08125	8.02201	-2.69956	-1.43272	2.69956	down	2.21864e-12	5.19771e-11
6396	SEC13	SEC13 homolog, nuclear pore and COPII coat complex component	6.24563	6.32363	6.01743	7.50386	7.12986	6.96533	2.00572	1.00412	2.00572	up	5.37067e-06	1.34713e-05
79813	EHMT1	euchromatic histone-lysine N-methyltransferase 1	5.28989	5.17172	5.49525	6.29198	6.58847	6.40833	2.15941	1.11064	2.15941	up	3.95515e-07	1.2217e-06
6615	SNAI1	snail family zinc finger 1	5.16463	5.32166	5.66487	7.30349	7.15738	7.11798	3.50455	1.80923	3.50455	up	5.00654e-09	2.5342e-08
1809	DPYSL3	dihydropyrimidinase like 3	8.66443	8.60181	8.69866	7.19038	7.23445	7.09207	-2.79465	-1.48267	2.79465	down	1.4633e-11	2.15878e-10
5264	PHYH	phytanoyl-CoA 2-hydroxylase	8.84508	8.73447	8.73043	7.44233	7.58419	7.55287	-2.36777	-1.24353	2.36777	down	1.07516e-10	1.02299e-09
115207	KCTD12	potassium channel tetramerization domain containing 12	6.20949	6.39855	6.18735	4.34234	4.23294	4.29319	-3.93303	-1.97564	3.93303	down	1.98626e-10	1.69285e-09
100996724	LOC100996724	phosphodiesterase 4D interacting protein-like	5.46274	5.69589	5.38995	7.15658	7.11621	7.09519	3.04505	1.60647	3.04505	up	9.80697e-10	6.34797e-09
1827	RCAN1	regulator of calcineurin 1	10.3676	10.2433	10.3139	9.2991	9.29239	9.26663	-2.03109	-1.02225	2.03109	down	2.37265e-11	3.13547e-10
79877	DCAKD	dephospho-CoA kinase domain containing	7.88733	7.90139	8.02504	6.81141	6.74425	6.56125	-2.34939	-1.23228	2.34939	down	2.75314e-09	1.51699e-08
978	CDA	cytidine deaminase	7.00882	6.92502	7.01834	5.71412	5.70407	5.77379	-2.38403	-1.2534	2.38403	down	1.64137e-09	9.8043e-09
10302	SNAPC5	small nuclear RNA activating complex polypeptide 5	9.52607	9.41776	9.46599	6.81631	6.85353	6.93392	-6.07136	-2.60202	6.07136	down	1.1798e-14	1.65839e-12
245812	CNPY4	canopy FGF signaling regulator 4	7.51781	7.37507	7.63131	5.86817	6.02171	5.96156	-2.9436	-1.55758	2.9436	down	5.11367e-10	3.68821e-09
65008	MRPL1	mitochondrial ribosomal protein L1	9.47304	9.36873	9.53257	7.83359	7.75673	7.82263	-3.14661	-1.6538	3.14661	down	1.62378e-12	4.15646e-11
2948	GSTM4	glutathione S-transferase mu 4	7.9632	7.98585	7.91197	6.71107	6.7925	6.80219	-2.27377	-1.18509	2.27377	down	2.83016e-10	2.26906e-09
5478	PPIA	peptidylprolyl isomerase A (cyclophilin A)	8.80308	8.87887	8.89655	7.10442	7.04646	7.12717	-3.40302	-1.76682	3.40302	down	8.18964e-13	2.55746e-11
9209	LRRFIP2	leucine rich repeat (in FLII) interacting protein 2	8.49751	8.39267	8.49092	9.29234	9.5801	9.58958	2.03774	1.02697	2.03774	up	1.26332e-08	5.66995e-08
7730	ZNF177	zinc finger protein 177	6.27279	6.39957	6.36676	4.95798	5.27488	5.19951	-2.30098	-1.20225	2.30098	down	7.34775e-08	2.68193e-07
22808	MRAS	muscle RAS oncogene homolog	7.56966	7.38998	7.55248	5.97921	6.05357	5.96858	-2.83547	-1.50359	2.83547	down	2.39334e-10	1.97351e-09
26130	GAPVD1	GTPase activating protein and VPS9 domains 1	8.73669	8.67511	8.73246	9.97925	10.0039	9.98374	2.41866	1.27421	2.41866	up	1.10299e-12	3.15301e-11
91120	ZNF682	zinc finger protein 682	6.82704	6.77657	6.84531	4.90407	5.21228	4.87965	-3.52504	-1.81764	3.52504	down	8.38389e-10	5.57647e-09
84058	WDR54	WD repeat domain 54	9.10377	9.06187	9.17396	7.18521	7.1232	6.91547	-4.10839	-2.03857	4.10839	down	3.85297e-12	7.87461e-11
53834	FGFRL1	fibroblast growth factor receptor-like 1	9.7456	9.72272	9.75659	8.721	8.70228	8.59424	-2.09817	-1.06913	2.09817	down	3.84341e-11	4.53109e-10
5074	PAWR	PRKC, apoptosis, WT1, regulator	10.4182	10.3933	10.2339	8.76905	8.9395	9.00182	-2.72263	-1.445	2.72263	down	7.19335e-11	7.42457e-10
84515	MCM8	minichromosome maintenance 8 homologous recombination repair factor	8.66035	8.57146	8.6815	7.09382	7.20974	7.12978	-2.81537	-1.49332	2.81537	down	1.19794e-11	1.86279e-10
129831	RBM45	RNA binding motif protein 45	7.89846	7.90361	7.87631	6.8653	6.90486	6.89689	-2.00524	-1.00378	2.00524	down	8.80681e-10	5.80441e-09
7486	WRN	Werner syndrome, RecQ helicase-like	7.44214	7.45333	7.47135	8.80369	8.86169	8.93669	2.6606	1.41175	2.6606	up	8.06158e-12	1.36729e-10
10230	NBR2	neighbor of BRCA1 gene 2 (non-protein coding)	6.47043	6.31861	6.5472	5.56855	5.53459	5.17305	-2.02794	-1.02002	2.02794	down	1.6396e-06	4.51424e-06
51191	HERC5	HECT and RLD domain containing E3 ubiquitin protein ligase 5	5.91753	5.69952	5.85522	6.94521	7.34548	7.22137	2.54311	1.3466	2.54311	up	3.60011e-08	1.42868e-07
316	AOX1	aldehyde oxidase 1	9.40927	9.26498	9.3502	8.1075	8.15003	8.04899	-2.36086	-1.23931	2.36086	down	3.12064e-11	3.8578e-10
127018	LYPLAL1	lysophospholipase-like 1	6.15391	6.06737	5.87697	4.24985	4.55363	4.45293	-3.06088	-1.61395	3.06088	down	1.02069e-08	4.71291e-08
6655	SOS2	SOS Ras/Rho guanine nucleotide exchange factor 2	7.78425	7.70691	7.5605	8.86516	9.14673	9.18875	2.60809	1.38299	2.60809	up	2.35761e-09	1.33172e-08
1119	CHKA	choline kinase alpha	6.71274	6.64772	6.72526	8.16733	8.32443	8.39058	3.02907	1.59887	3.02907	up	4.38062e-11	5.01263e-10
29925	GMPPB	GDP-mannose pyrophosphorylase B	9.49232	9.56371	9.64197	6.99206	6.88247	6.99606	-6.10138	-2.60914	6.10138	down	1.98289e-14	2.18885e-12
23229	ARHGEF9	Cdc42 guanine nucleotide exchange factor 9	6.76108	6.7223	6.88756	4.90823	5.11443	4.892	-3.52778	-1.81876	3.52778	down	3.55826e-10	2.73283e-09
114041	B3GALT5-AS1	B3GALT5 antisense RNA 1	5.65923	5.68264	5.77581	4.28631	4.69417	4.44611	-2.34626	-1.23036	2.34626	down	2.32563e-07	7.55873e-07
10626	TRIM16	tripartite motif containing 16	10.1249	10.1661	10.2306	8.68759	8.55005	8.65433	-2.91446	-1.54323	2.91446	down	1.20754e-12	3.35613e-11
4172	MCM3	minichromosome maintenance complex component 3	9.87082	9.89534	9.90042	7.90182	7.90132	7.91516	-3.95249	-1.98276	3.95249	down	1.02432e-14	1.49854e-12
54681	P4HTM	prolyl 4-hydroxylase, transmembrane (endoplasmic reticulum)	7.27739	7.13531	7.46301	6.32288	6.22082	6.26997	-2.02888	-1.02068	2.02888	down	9.14174e-08	3.25941e-07
131583	FAM43A	family with sequence similarity 43 member A	7.3158	7.34799	7.30565	8.91044	8.93046	8.91547	3.02229	1.59564	3.02229	up	7.28884e-13	2.35393e-11
5494	PPM1A	protein phosphatase, Mg2+/Mn2+ dependent 1A	5.52806	5.39688	5.66504	6.94836	7.15928	7.11154	2.91413	1.54307	2.91413	up	2.09364e-09	1.20865e-08
317749	DHRS4L2	dehydrogenase/reductase (SDR family) member 4 like 2	8.6453	8.57482	8.54099	7.28915	7.30019	7.54016	-2.31424	-1.21054	2.31424	down	1.48728e-09	9.01199e-09
6299	SALL1	spalt-like transcription factor 1	6.49615	6.48499	6.54702	7.57108	7.61177	7.50427	2.07482	1.05299	2.07482	up	2.32133e-09	1.31541e-08
23609	MKRN2	makorin ring finger protein 2	8.80752	8.77812	8.89614	9.92352	9.93272	9.89709	2.1295	1.09052	2.1295	up	1.84853e-11	2.57798e-10
9771	RAPGEF5	Rap guanine nucleotide exchange factor 5	4.96429	4.77648	5.04333	5.95667	5.9679	5.88775	2.01308	1.00941	2.01308	up	3.34242e-07	1.05036e-06
27291	R3HCC1L	R3H domain and coiled-coil containing 1 like	5.77495	5.79729	5.85858	7.09578	7.24841	7.31507	2.65641	1.40948	2.65641	up	1.02635e-09	6.58241e-09
128387	TATDN3	TatD DNase domain containing 3	7.04087	7.13459	7.06249	5.85592	6.12045	6.06471	-2.09307	-1.06562	2.09307	down	4.20154e-08	1.63553e-07
1774	DNASE1L1	deoxyribonuclease I-like 1	10.5265	10.4175	10.4664	9.03859	9.00055	8.99169	-2.75078	-1.45984	2.75078	down	3.52591e-13	1.43823e-11
57606	SLAIN2	SLAIN motif family member 2	7.87667	7.89878	7.90263	9.23325	9.35519	9.39306	2.70283	1.43447	2.70283	up	5.90919e-12	1.07602e-10
51185	CRBN	cereblon	7.25242	7.02631	7.22117	8.38545	8.5605	8.55366	2.51967	1.33324	2.51967	up	7.66444e-10	5.15763e-09
102724862	TBC1D3I	TBC1 domain family member 3I	7.68451	7.54391	7.4359	8.61131	8.881	8.6949	2.25683	1.1743	2.25683	up	6.85411e-09	3.33755e-08
80820	EEPD1	endonuclease/exonuclease/phosphatase family domain containing 1	7.95576	8.05591	8.11798	5.72766	5.46225	5.7581	-5.25569	-2.39388	5.25569	down	8.92838e-12	1.4815e-10
10643	IGF2BP3	insulin like growth factor 2 mRNA binding protein 3	8.19188	8.03171	8.15312	10.0105	10.0231	10.0256	3.71699	1.89414	3.71699	up	1.29562e-13	7.21212e-12
10360	NPM3	nucleophosmin/nucleoplasmin 3	9.56125	9.52338	9.63437	8.51195	8.50019	8.4778	-2.1087	-1.07635	2.1087	down	2.75598e-11	3.50538e-10
11077	HSF2BP	heat shock transcription factor 2 binding protein	6.49404	6.47652	6.3912	5.30528	5.43247	5.37037	-2.12071	-1.08455	2.12071	down	2.7118e-08	1.11172e-07
9317	PTER	phosphotriesterase related	7.18699	7.10039	7.10908	5.36741	5.56321	5.55798	-3.10793	-1.63595	3.10793	down	2.87794e-10	2.29925e-09
5447	POR	P450 (cytochrome) oxidoreductase	7.40678	7.37085	7.63045	9.01279	8.88365	8.86446	2.73386	1.45094	2.73386	up	2.42096e-10	1.99334e-09
497661	C18orf32	chromosome 18 open reading frame 32	9.05331	9.0729	8.92224	7.44038	7.83493	7.73087	-2.54457	-1.34742	2.54457	down	4.8158e-09	2.44812e-08
25805	BAMBI	BMP and activin membrane-bound inhibitor	9.16391	9.04718	9.13383	8.15221	7.98847	8.12206	-2.03834	-1.02739	2.03834	down	6.56882e-10	4.53516e-09
125170	MIEF2	mitochondrial elongation factor 2	7.11693	7.30644	7.11365	6.26355	5.83784	5.90876	-2.2589	-1.17562	2.2589	down	2.35583e-07	7.64863e-07
64981	MRPL34	mitochondrial ribosomal protein L34	10.7777	10.781	10.7373	9.56638	9.72184	9.711	-2.1419	-1.09889	2.1419	down	2.91389e-11	3.65423e-10
55201	MAP1S	microtubule associated protein 1S	7.95595	7.99379	8.04025	9.29198	9.2124	9.21834	2.36894	1.24424	2.36894	up	1.14076e-11	1.79531e-10
10482	NXF1	nuclear RNA export factor 1	6.89163	6.87824	6.99225	9.24571	9.17287	9.22289	4.90114	2.29312	4.90114	up	4.48529e-14	3.59164e-12
728392	LOC728392	uncharacterized LOC728392	8.80878	8.64963	8.74591	7.52035	7.43863	7.39343	-2.43508	-1.28397	2.43508	down	9.52726e-11	9.296e-10
617	BCS1L	BCS1 homolog, ubiquinol-cytochrome c reductase complex chaperone	8.9516	9.04017	9.17755	8.09746	7.91785	7.87988	-2.13077	-1.09138	2.13077	down	4.43309e-09	2.28237e-08
54677	CROT	carnitine O-octanoyltransferase	6.84914	6.57921	6.56451	5.26808	5.30861	5.12881	-2.69282	-1.42912	2.69282	down	1.05547e-08	4.84829e-08
23360	FNBP4	formin binding protein 4	8.75422	8.82229	8.93619	9.91564	9.88653	9.86832	2.07426	1.0526	2.07426	up	1.26999e-10	1.17208e-09
134637	ADAT2	adenosine deaminase, tRNA-specific 2	6.15305	5.89739	6.36985	4.16637	4.20538	4.27047	-3.80006	-1.92602	3.80006	down	3.0634e-09	1.65985e-08
3835	KIF22	kinesin family member 22	7.35163	7.34413	7.41194	6.45181	6.34207	6.23125	-2.03852	-1.02752	2.03852	down	1.58838e-08	6.93743e-08
55664	CDC37L1	cell division cycle 37-like 1	8.01956	7.82979	7.89243	9.02194	9.24136	9.18077	2.35234	1.2341	2.35234	up	6.17799e-10	4.31179e-09
157769	FAM91A1	family with sequence similarity 91 member A1	8.99061	9.09483	8.9835	9.95329	10.2332	10.1899	2.14725	1.10249	2.14725	up	2.07645e-09	1.19925e-08
1408	CRY2	cryptochrome circadian clock 2	5.87403	6.09224	5.79249	7.36079	7.43801	7.41222	2.7974	1.48409	2.7974	up	1.29516e-09	8.00301e-09
197131	UBR1	ubiquitin protein ligase E3 component n-recognin 1	6.74426	6.71896	6.89951	8.12723	8.10571	7.97741	2.43267	1.28254	2.43267	up	6.86675e-10	4.7018e-09
26071	FAM127B	family with sequence similarity 127 member B	9.53324	9.57446	9.66998	7.60791	7.53545	7.5078	-4.11866	-2.04217	4.11866	down	1.2496e-13	7.0361e-12
79600	TCTN1	tectonic family member 1	7.2237	7.22022	7.12689	5.68146	5.49525	5.67344	-2.97637	-1.57355	2.97637	down	3.54779e-10	2.72757e-09
55214	P3H2	prolyl 3-hydroxylase 2	9.19889	9.16674	9.2036	7.78597	7.92899	7.86997	-2.51072	-1.3281	2.51072	down	1.06365e-11	1.69581e-10
129401	NUP35	nucleoporin 35kDa	8.12969	8.14459	8.21304	7.03484	6.86671	7.08018	-2.24783	-1.16853	2.24783	down	1.22893e-09	7.65308e-09
5890	RAD51B	RAD51 paralog B	4.96606	4.73113	4.74136	3.62626	3.81092	3.97289	-2.0132	-1.00949	2.0132	down	3.16996e-06	8.26645e-06
9053	MAP7	microtubule associated protein 7	3.67819	3.96741	3.82577	4.92434	4.78349	4.82213	2.02726	1.01953	2.02726	up	1.08812e-06	3.09263e-06
8541	PPFIA3	protein tyrosine phosphatase, receptor type, f polypeptide (PTPRF), interacting protein (liprin), alpha 3	4.42982	4.79376	4.91918	5.82921	5.96657	6.14068	2.40255	1.26457	2.40255	up	8.17898e-07	2.37487e-06
414899	BLID	BH3-like motif containing, cell death inducer	5.85038	5.91333	5.86948	4.41326	4.69529	4.31591	-2.64434	-1.40291	2.64434	down	3.94582e-08	1.54686e-07
152816	C4orf26	chromosome 4 open reading frame 26	7.55245	7.44634	7.67636	5.53308	5.02975	5.12899	-5.02031	-2.32778	5.02031	down	4.26762e-10	3.17407e-09
3434	IFIT1	interferon induced protein with tetratricopeptide repeats 1	7.57003	7.39753	7.60579	4.78177	4.54711	4.98411	-6.74329	-2.75345	6.74329	down	2.53077e-11	3.28991e-10
169834	ZNF883	zinc finger protein 883	6.40261	6.38203	6.43632	4.62821	4.58729	4.9131	-3.24328	-1.69745	3.24328	down	2.19174e-09	1.25479e-08
124152	IQCK	IQ motif containing K	6.2356	6.02795	6.13256	3.76536	4.05558	3.94733	-4.62444	-2.20928	4.62444	down	1.99881e-10	1.70243e-09
10927	SPIN1	spindlin 1	9.14706	9.24726	9.07012	7.63239	7.88167	7.84142	-2.58408	-1.36965	2.58408	down	3.37369e-10	2.62303e-09
5558	PRIM2	primase, DNA, polypeptide 2 (58kDa)	7.45415	7.52642	7.57207	6.2635	6.47301	6.41667	-2.19338	-1.13315	2.19338	down	5.59223e-09	2.7909e-08
56935	SMCO4	single-pass membrane protein with coiled-coil domains 4	8.78307	8.84736	8.80137	7.70778	7.74228	7.70357	-2.13276	-1.09272	2.13276	down	5.09562e-11	5.64403e-10
23467	NPTXR	neuronal pentraxin receptor	8.93259	9.21014	9.261	7.39816	7.25038	7.64267	-3.25842	-1.70417	3.25842	down	1.82803e-09	1.07162e-08
2332	FMR1	fragile X mental retardation 1	5.02231	4.91917	5.01052	6.27961	6.364	6.37681	2.55999	1.35614	2.55999	up	3.28917e-09	1.76408e-08
79020	C7orf25	chromosome 7 open reading frame 25	7.35567	7.19287	7.37439	6.06529	6.26234	6.23641	-2.17291	-1.11963	2.17291	down	1.71489e-08	7.42689e-08
6502	SKP2	S-phase kinase-associated protein 2, E3 ubiquitin protein ligase	5.4596	5.60146	5.42443	3.13203	3.80445	3.57234	-3.9785	-1.99222	3.9785	down	3.0233e-08	1.22477e-07
23074	UHRF1BP1L	UHRF1 binding protein 1-like	8.01917	7.64253	7.66146	8.8417	8.89383	8.90043	2.1499	1.10427	2.1499	up	3.45702e-08	1.37861e-07
835	CASP2	caspase 2	9.73588	9.72119	9.71972	8.45546	8.5433	8.5632	-2.30528	-1.20494	2.30528	down	6.46694e-12	1.15709e-10
128344	PIFO	primary cilia formation	5.08549	5.56771	5.09506	4.35761	4.20474	3.98033	-2.09729	-1.06853	2.09729	down	1.18681e-05	2.8024e-05
6386	SDCBP	syndecan binding protein	10.239	10.318	10.3284	11.4468	11.5015	11.5261	2.29151	1.1963	2.29151	up	1.39058e-12	3.73211e-11
80150	ASRGL1	asparaginase like 1	6.97271	6.88844	6.98061	5.32622	5.48713	5.63437	-2.76002	-1.46468	2.76002	down	3.15217e-09	1.70275e-08
645455	CEP170P1	centrosomal protein 170kDa pseudogene 1	6.05203	6.032	6.18053	7.13357	7.30897	7.30249	2.23482	1.16016	2.23482	up	8.07463e-09	3.85077e-08
9203	ZMYM3	zinc finger, MYM-type 3	7.5303	7.74734	7.86755	5.79293	5.66861	5.73132	-3.95619	-1.98411	3.95619	down	8.73237e-11	8.66518e-10
699	BUB1	BUB1, mitotic checkpoint serine/threonine kinase	9.06304	9.09259	8.97316	7.23934	7.32812	7.28035	-3.38775	-1.76033	3.38775	down	8.72814e-13	2.66669e-11
84869	CBR4	carbonyl reductase 4	6.97618	6.8204	6.95036	5.27893	5.54492	5.38596	-2.8528	-1.51238	2.8528	down	2.14239e-09	1.23097e-08
83990	BRIP1	BRCA1 interacting protein C-terminal helicase 1	6.69757	6.76378	6.61141	3.62869	3.67703	3.75466	-8.02292	-3.00413	8.02292	down	1.19633e-12	3.34161e-11
154791	C7orf55	chromosome 7 open reading frame 55	9.63839	9.65293	9.71229	8.19196	8.14951	8.08228	-2.8811	-1.52662	2.8811	down	9.14484e-13	2.75523e-11
83988	NCALD	neurocalcin delta	7.07336	7.02268	7.31327	5.3912	5.32351	5.32172	-3.46045	-1.79096	3.46045	down	3.06913e-10	2.42189e-09
80380	PDCD1LG2	programmed cell death 1 ligand 2	7.639	7.72084	7.78415	5.11148	4.63626	4.67463	-7.50164	-2.90721	7.50164	down	2.56966e-11	3.32829e-10
9879	DDX46	DEAD (Asp-Glu-Ala-Asp) box polypeptide 46	7.65439	7.62445	7.66617	6.53037	6.05099	6.13305	-2.65774	-1.4102	2.65774	down	2.74094e-08	1.12237e-07
84315	MON1A	MON1 homolog A, secretory trafficking associated	7.31609	7.26838	7.53887	8.45373	8.50273	8.45318	2.13677	1.09543	2.13677	up	4.06413e-09	2.11554e-08
14	AAMP	angio-associated migratory cell protein	9.68184	9.70421	9.83897	10.9239	10.704	10.8022	2.09705	1.06836	2.09705	up	6.34316e-10	4.40582e-09
286257	C9orf142	chromosome 9 open reading frame 142	9.1206	9.05042	9.12639	7.33692	7.36058	7.27653	-3.4211	-1.77446	3.4211	down	4.21167e-13	1.63364e-11
55366	LGR4	leucine-rich repeat containing G protein-coupled receptor 4	6.89801	6.70034	6.59966	5.36074	5.69617	5.74099	-2.19371	-1.13337	2.19371	down	5.60167e-07	1.68046e-06
91523	PCED1B	PC-esterase domain containing 1B	6.45795	6.44697	6.64105	4.94058	4.88647	4.79164	-3.12191	-1.64243	3.12191	down	9.75106e-10	6.31929e-09
57685	CACHD1	cache domain containing 1	6.438	6.52739	6.66552	7.59331	7.57602	7.63479	2.08166	1.05774	2.08166	up	8.2429e-09	3.92288e-08
196294	IMMP1L	inner mitochondrial membrane peptidase subunit 1	7.37488	7.26567	7.30331	5.50046	5.65359	5.85468	-3.12757	-1.64504	3.12757	down	1.09984e-09	6.97113e-09
23344	ESYT1	extended synaptotagmin-like protein 1	10.7987	10.7257	10.7816	9.46925	9.47404	9.51195	-2.43443	-1.28358	2.43443	down	4.76081e-13	1.74809e-11
27085	MTBP	MDM2 binding protein	6.52617	6.85335	6.69511	5.1769	4.72918	4.89754	-3.37995	-1.757	3.37995	down	1.17344e-08	5.31648e-08
139231	FAM199X	family with sequence similarity 199, X-linked	5.27151	5.44572	5.68667	6.30323	6.54971	6.57037	2.00899	1.00647	2.00899	up	2.17098e-06	5.84186e-06
130814	PQLC3	PQ loop repeat containing 3	9.48373	9.56845	9.56383	7.34643	7.4252	7.38649	-4.44638	-2.15263	4.44638	down	3.00287e-14	2.77581e-12
9678	PHF14	PHD finger protein 14	4.21637	4.53956	4.28792	5.3659	5.59067	5.51579	2.20815	1.14284	2.20815	up	4.72011e-07	1.43629e-06
56949	XAB2	XPA binding protein 2	5.31513	5.16318	5.33101	6.50427	6.46802	6.30402	2.22787	1.15566	2.22787	up	4.41854e-08	1.70854e-07
4791	NFKB2	nuclear factor of kappa light polypeptide gene enhancer in B-cells 2 (p49/p100)	6.53733	6.85858	6.80966	7.86063	7.81153	7.78467	2.11954	1.08375	2.11954	up	2.94169e-08	1.19506e-07
91057	CCDC34	coiled-coil domain containing 34	8.89926	8.84589	8.91236	6.80143	6.70137	6.61833	-4.52775	-2.17879	4.52775	down	3.31444e-13	1.38671e-11
1266	CNN3	calponin 3, acidic	12.4019	12.3099	12.2544	11.1182	11.1314	11.2486	-2.22842	-1.15602	2.22842	down	1.76973e-11	2.49659e-10
51054	PLEKHA8P1	pleckstrin homology domain containing A8 pseudogene 1	4.57438	4.74791	4.70827	6.0293	5.91781	5.79912	2.35962	1.23856	2.35962	up	4.6868e-08	1.80085e-07
201255	LRRC45	leucine rich repeat containing 45	6.54846	6.6228	6.70687	5.48531	5.41965	5.36158	-2.30356	-1.20386	2.30356	down	9.42614e-09	4.39658e-08
25978	CHMP2B	charged multivesicular body protein 2B	8.57471	8.5554	8.48272	9.56724	9.61192	9.60845	2.08242	1.05826	2.08242	up	2.65879e-11	3.41207e-10
79670	ZCCHC6	zinc finger, CCHC domain containing 6	4.50712	4.69459	4.69608	6.37707	6.53244	6.46426	3.54387	1.82533	3.54387	up	3.78153e-10	2.8766e-09
466	ATF1	activating transcription factor 1	8.45022	8.36414	8.45998	9.42825	9.43801	9.43226	2.0112	1.00806	2.0112	up	5.40407e-11	5.91195e-10
50484	RRM2B	ribonucleotide reductase M2 B (TP53 inducible)	5.7979	5.74912	5.76205	6.90352	6.76101	6.67497	2.01411	1.01014	2.01411	up	5.76766e-08	2.16527e-07
29940	DSE	dermatan sulfate epimerase	6.04411	6.20229	6.24735	7.28167	7.16335	7.22107	2.08124	1.05745	2.08124	up	1.81737e-08	7.81096e-08
54478	FAM64A	family with sequence similarity 64 member A	9.88374	9.86378	9.91126	6.81762	6.67024	6.73792	-8.84176	-3.14433	8.84176	down	9.17051e-16	3.62714e-13
64771	C6orf106	chromosome 6 open reading frame 106	7.1551	7.25708	7.29762	8.763	8.71674	8.69503	2.80563	1.48832	2.80563	up	9.77415e-12	1.58577e-10
51334	PRR16	proline rich 16	8.09178	8.09441	8.15109	5.13654	5.48245	5.40414	-6.82762	-2.77138	6.82762	down	2.14258e-12	5.0674e-11
4925	NUCB2	nucleobindin 2	10.7843	10.7997	10.6595	9.65226	9.76019	9.79467	-2.01684	-1.01209	2.01684	down	1.92209e-10	1.64771e-09
5569	PKIA	protein kinase (cAMP-dependent, catalytic) inhibitor alpha	4.87115	5.07787	5.50758	4.07177	4.02646	3.96039	-2.19263	-1.13266	2.19263	down	6.46712e-06	1.59987e-05
90853	SPOCD1	SPOC domain containing 1	9.67496	9.7227	9.77013	8.6231	8.63802	8.61806	-2.13791	-1.0962	2.13791	down	1.21288e-11	1.88153e-10
7337	UBE3A	ubiquitin protein ligase E3A	9.30336	9.3157	9.242	10.3161	10.3562	10.3849	2.09268	1.06535	2.09268	up	8.05336e-12	1.36729e-10
8540	AGPS	alkylglycerone phosphate synthase	8.41813	8.47343	8.34541	6.43416	6.149	6.1874	-4.45514	-2.15547	4.45514	down	9.34552e-12	1.53604e-10
55344	PLCXD1	phosphatidylinositol-specific phospholipase C, X domain containing 1	7.29731	7.13483	7.24042	5.74249	5.68974	5.62151	-2.90715	-1.53961	2.90715	down	2.81039e-10	2.25685e-09
64105	CENPK	centromere protein K	7.80668	7.7355	7.73653	6.20899	6.1398	6.20567	-2.97884	-1.57475	2.97884	down	2.61945e-11	3.37711e-10
9815	GIT2	G protein-coupled receptor kinase interacting ArfGAP 2	10.2333	10.2338	10.1564	8.85478	8.80812	8.80741	-2.6106	-1.38438	2.6106	down	5.99559e-13	2.06423e-11
960	CD44	CD44 molecule (Indian blood group)	10.9192	10.8894	10.9636	11.9966	11.9171	11.9525	2.04386	1.0313	2.04386	up	2.99356e-12	6.52591e-11
64794	DDX31	DEAD (Asp-Glu-Ala-Asp) box polypeptide 31	5.7385	5.67283	6.174	7.06518	7.17518	7.0898	2.37557	1.24828	2.37557	up	2.59599e-07	8.3472e-07
4856	NOV	nephroblastoma overexpressed	8.48774	8.36054	8.38991	7.31423	7.41879	7.41742	-2.04096	-1.02925	2.04096	down	9.63195e-10	6.25645e-09
7707	ZNF148	zinc finger protein 148	6.25301	6.16717	6.39003	7.90183	7.79052	7.92428	3.03593	1.60214	3.03593	up	1.28168e-10	1.1804e-09
1857	DVL3	dishevelled segment polarity protein 3	6.41887	6.45494	6.50491	7.67356	7.56716	7.65181	2.2521	1.17127	2.2521	up	8.1356e-10	5.43165e-09
904	CCNT1	cyclin T1	5.82881	5.65197	5.5735	6.99132	7.14145	7.1148	2.63493	1.39776	2.63493	up	3.24761e-09	1.74682e-08
84236	RHBDD1	rhomboid domain containing 1	6.58102	6.38156	6.40188	5.53724	5.40586	5.35152	-2.03253	-1.02328	2.03253	down	1.5448e-07	5.21658e-07
2020	EN2	engrailed homeobox 2	5.0521	5.11994	5.53636	6.91124	7.02159	6.9787	3.32736	1.73438	3.32736	up	8.10861e-09	3.86509e-08
126969	SLC44A3	solute carrier family 44, member 3	6.55989	6.32024	6.50629	5.06203	5.02849	4.97652	-2.71282	-1.43979	2.71282	down	3.93935e-09	2.06075e-08
2803	GOLGA4	golgin A4	9.38599	9.33679	9.42729	10.5038	10.5563	10.533	2.21556	1.14767	2.21556	up	2.93417e-12	6.41985e-11
84314	TMEM107	transmembrane protein 107	8.05995	8.01353	8.07654	5.17707	5.16791	4.91007	-7.8082	-2.96499	7.8082	down	5.35488e-13	1.90636e-11
9907	AP5Z1	adaptor-related protein complex 5, zeta 1 subunit	8.32657	8.32977	8.47592	10.1037	10.0462	10.0644	3.23546	1.69397	3.23546	up	5.27848e-13	1.89346e-11
6596	HLTF	helicase-like transcription factor	8.18	7.93454	7.87409	6.09676	6.5413	6.50251	-3.06528	-1.61602	3.06528	down	1.4838e-08	6.53129e-08
133746	JMY	junction mediating and regulatory protein, p53 cofactor	7.04738	6.98964	7.15965	8.94055	9.12058	9.0536	3.92498	1.97269	3.92498	up	1.96492e-12	4.73962e-11
114793	FMNL2	formin like 2	6.99319	6.87595	6.94032	8.1939	8.34014	8.3265	2.54976	1.35036	2.54976	up	1.11611e-10	1.0568e-09
53833	IL20RB	interleukin 20 receptor beta subunit	4.22696	4.06907	4.06031	5.49007	5.94916	5.40212	2.81865	1.495	2.81865	up	2.2719e-07	7.40012e-07
23382	AHCYL2	adenosylhomocysteinase-like 2	6.12489	5.82932	5.74661	7.54371	7.72044	7.62907	3.31912	1.7308	3.31912	up	1.0959e-09	6.95089e-09
55435	AP1AR	adaptor-related protein complex 1 associated regulatory protein	6.41959	6.48451	6.34462	7.7756	8.06664	8.22752	3.04621	1.60701	3.04621	up	3.05016e-09	1.6536e-08
400629	TEX19	testis expressed 19	6.25301	6.26169	6.18588	5.23105	5.00477	5.25621	-2.09873	-1.06952	2.09873	down	1.32789e-07	4.54897e-07
5191	PEX7	peroxisomal biogenesis factor 7	7.88983	7.83825	7.75094	6.36386	6.62951	6.52499	-2.49704	-1.32022	2.49704	down	1.67824e-09	9.96966e-09
26167	PCDHB5	protocadherin beta 5	7.30592	7.20202	7.23667	4.88674	5.32675	4.90746	-4.61998	-2.20789	4.61998	down	3.77366e-10	2.87117e-09
3887	KRT81	keratin 81, type II	13.6642	13.5967	13.559	10.67	10.7263	10.6662	-7.56402	-2.91915	7.56402	down	2.38683e-17	4.66351e-14
28982	FLVCR1	feline leukemia virus subgroup C cellular receptor 1	6.41855	6.21241	6.18518	7.81759	7.76503	7.80378	2.87472	1.52342	2.87472	up	2.20757e-10	1.84762e-09
100506965	PWAR6	Prader Willi/Angelman region RNA 6	7.79894	7.9255	7.72044	5.51236	5.63019	5.67477	-4.62415	-2.20919	4.62415	down	6.43353e-12	1.15164e-10
5436	POLR2G	polymerase (RNA) II (DNA directed) polypeptide G	10.7829	10.782	10.8936	9.47478	9.37525	9.40414	-2.64164	-1.40143	2.64164	down	1.2529e-12	3.45271e-11
63893	UBE2O	ubiquitin conjugating enzyme E2O	7.15913	7.11731	7.25083	8.76263	8.69577	8.56892	2.82846	1.50002	2.82846	up	4.15996e-11	4.80517e-10
8508	NIPSNAP1	nipsnap homolog 1 (C. elegans)	8.94769	8.90614	8.79339	6.66688	6.98954	6.86038	-4.12237	-2.04347	4.12237	down	1.50114e-11	2.19618e-10
200424	TET3	tet methylcytosine dioxygenase 3	7.0606	6.96175	7.0878	8.39993	8.51932	8.48243	2.69542	1.43051	2.69542	up	3.22523e-11	3.9459e-10
9070	ASH2L	ash2 (absent, small, or homeotic)-like (Drosophila)	9.06973	9.06244	9.12502	7.96342	7.95414	7.89255	-2.21764	-1.14903	2.21764	down	2.44873e-11	3.2132e-10
57609	DIP2B	disco interacting protein 2 homolog B	7.19412	7.10878	7.43608	9.20737	9.14627	9.03992	3.69317	1.88486	3.69317	up	3.91537e-11	4.59462e-10
4329	ALDH6A1	aldehyde dehydrogenase 6 family member A1	6.70779	6.71661	6.58208	5.27806	5.33707	5.01626	-2.74796	-1.45836	2.74796	down	8.69891e-09	4.10144e-08
339855	KY	kyphoscoliosis peptidase	6.4269	6.39291	6.43	5.19258	4.95038	5.05721	-2.54891	-1.34988	2.54891	down	6.58786e-09	3.2272e-08
11174	ADAMTS6	ADAM metallopeptidase with thrombospondin type 1 motif 6	8.27495	8.1489	8.19052	6.42043	6.13881	6.2955	-3.78391	-1.91988	3.78391	down	2.56206e-11	3.31955e-10
83874	TBC1D10A	TBC1 domain family member 10A	6.05887	6.08335	6.32676	7.57694	7.44243	7.54246	2.57448	1.36428	2.57448	up	2.81838e-09	1.54572e-08
3280	HES1	hes family bHLH transcription factor 1	5.10135	5.10502	4.75059	6.41205	6.41571	6.47062	2.72667	1.44714	2.72667	up	1.95209e-08	8.3168e-08
91355	LRP5L	LDL receptor related protein 5 like	5.05355	5.1603	5.19724	6.89604	6.84015	6.82481	3.28669	1.71664	3.28669	up	1.43374e-10	1.29417e-09
9585	KIF20B	kinesin family member 20B	6.83838	6.85661	6.85948	4.5492	4.37364	4.39765	-5.31963	-2.41133	5.31963	down	7.0892e-12	1.23893e-10
8491	MAP4K3	mitogen-activated protein kinase kinase kinase kinase 3	7.09085	7.1061	6.9822	8.09507	8.31574	8.4205	2.32525	1.21739	2.32525	up	5.63782e-09	2.80863e-08
84932	RAB2B	RAB2B, member RAS oncogene family	4.07297	4.44244	4.32931	5.31719	5.27429	5.31725	2.0298	1.02134	2.0298	up	1.27392e-06	3.57083e-06
101929946	ZEB1-AS1	ZEB1 antisense RNA 1	6.69275	6.87264	6.47211	3.79031	3.82637	3.61464	-7.64965	-2.93539	7.64965	down	2.05919e-11	2.80666e-10
5198	PFAS	phosphoribosylformylglycinamidine synthase	9.56744	9.48222	9.50628	8.49661	8.50244	8.46809	-2.04146	-1.0296	2.04146	down	3.11284e-11	3.84938e-10
144106	ST13P5	suppression of tumorigenicity 13 (colon carcinoma) (Hsp70 interacting protein) pseudogene 5	9.43724	9.21386	9.11225	10.0428	10.4253	10.4857	2.08995	1.06347	2.08995	up	4.7099e-07	1.4334e-06
54585	LZTFL1	leucine zipper transcription factor like 1	7.38902	7.37302	7.49622	8.75803	8.83762	8.92214	2.67556	1.41984	2.67556	up	3.28884e-11	4.00492e-10
9321	TRIP11	thyroid hormone receptor interactor 11	6.69001	6.74299	6.77001	7.92649	7.91971	7.92738	2.28183	1.19019	2.28183	up	1.89611e-10	1.63113e-09
80325	ABTB1	ankyrin repeat and BTB (POZ) domain containing 1	5.87656	5.80037	5.96813	7.56637	7.61806	7.50125	3.20474	1.68021	3.20474	up	6.11683e-11	6.52367e-10
4836	NMT1	N-myristoyltransferase 1	8.8044	8.7667	8.85449	10.0502	9.92249	9.93265	2.23444	1.15991	2.23444	up	2.311e-11	3.0748e-10
79017	GGCT	gamma-glutamylcyclotransferase	9.43672	9.57595	9.37071	8.33766	8.43722	8.40375	-2.09689	-1.06825	2.09689	down	4.7785e-10	3.48636e-09
5933	RBL1	retinoblastoma-like 1	6.43532	6.1126	6.3277	4.38739	4.70567	4.66325	-3.26354	-1.70644	3.26354	down	8.66426e-09	4.08856e-08
51250	C6orf203	chromosome 6 open reading frame 203	8.40767	8.34849	8.44615	6.83723	7.13718	7.05318	-2.62365	-1.39157	2.62365	down	6.62747e-10	4.56758e-09
4487	MSX1	msh homeobox 1	8.25323	8.15406	8.22873	9.58779	9.65887	9.65103	2.67689	1.42056	2.67689	up	1.77763e-12	4.4443e-11
8444	DYRK3	dual specificity tyrosine-(Y)-phosphorylation regulated kinase 3	8.51238	8.45373	8.50305	10.2171	10.1928	10.2226	3.29691	1.72111	3.29691	up	3.41785e-14	3.00809e-12
120227	CYP2R1	cytochrome P450, family 2, subfamily R, polypeptide 1	7.87898	7.95395	7.87528	6.4635	6.55332	6.51352	-2.62556	-1.39262	2.62556	down	6.75869e-11	7.04668e-10
4811	NID1	nidogen 1	9.72159	9.5175	9.3477	8.06235	8.13072	8.1268	-2.68014	-1.42231	2.68014	down	6.37865e-10	4.42654e-09
10732	TCFL5	transcription factor-like 5 (basic helix-loop-helix)	7.76996	7.57412	7.54148	5.80941	5.91662	5.92129	-3.35446	-1.74608	3.35446	down	9.91992e-11	9.61172e-10
79713	IGFLR1	IGF like family receptor 1	7.2778	7.33657	7.37302	5.92906	5.95448	6.01749	-2.57063	-1.36212	2.57063	down	3.48262e-10	2.689e-09
9743	ARHGAP32	Rho GTPase activating protein 32	6.78358	6.60452	6.84764	8.0874	8.12766	8.12079	2.57881	1.3667	2.57881	up	3.48233e-10	2.689e-09
8774	NAPG	N-ethylmaleimide-sensitive factor attachment protein, gamma	8.19015	8.2347	8.24012	9.29829	9.27714	9.34275	2.1205	1.0844	2.1205	up	2.28403e-11	3.04807e-10
10505	SEMA4F	sema domain, immunoglobulin domain (Ig), transmembrane domain (TM) and short cytoplasmic domain, (semaphorin) 4F	9.0337	9.03965	8.92728	7.3802	7.57613	7.55277	-2.8229	-1.49718	2.8229	down	3.26805e-11	3.9883e-10
64648	SPANXD	SPANX family member D	11.3156	11.2482	11.2691	9.96392	10.0841	10.078	-2.35486	-1.23564	2.35486	down	2.41564e-12	5.52024e-11
5704	PSMC4	proteasome 26S subunit, ATPase 4	9.16442	9.07944	9.23874	10.616	10.5545	10.5249	2.64688	1.40429	2.64688	up	2.69144e-12	6.01679e-11
79735	TBC1D17	TBC1 domain family member 17	6.40762	6.34345	6.53899	7.64329	7.48114	7.48114	2.15124	1.10517	2.15124	up	1.01946e-08	4.70836e-08
121441	NEDD1	neural precursor cell expressed, developmentally down-regulated 1	8.5433	8.50189	8.51252	6.80284	6.83458	6.85944	-3.21975	-1.68695	3.21975	down	1.38917e-12	3.7309e-11
64782	AEN	apoptosis enhancing nuclease	9.30278	9.25967	9.35165	10.5078	10.3999	10.3724	2.17645	1.12198	2.17645	up	2.28775e-11	3.05114e-10
56998	CTNNBIP1	catenin beta interacting protein 1	7.0869	7.08498	7.2005	5.83788	5.54047	5.22218	-3.01178	-1.59062	3.01178	down	5.40557e-08	2.04505e-07
112487	DTD2	D-tyrosyl-tRNA deacylase 2 (putative)	9.26332	9.23359	9.10801	8.03008	8.17543	8.01951	-2.18349	-1.12663	2.18349	down	4.19098e-10	3.12599e-09
6451	SH3BGRL	SH3 domain binding glutamate-rich protein like	9.63756	9.59271	9.51412	8.12432	8.34428	8.25511	-2.53191	-1.34023	2.53191	down	6.36494e-11	6.7189e-10
10766	TOB2	transducer of ERBB2, 2	6.63602	6.2842	6.38467	7.38636	7.60398	7.46539	2.07093	1.05028	2.07093	up	1.726e-07	5.76074e-07
90993	CREB3L1	cAMP responsive element binding protein 3-like 1	9.99592	10.015	10.0309	8.40916	8.59827	8.41122	-2.91011	-1.54107	2.91011	down	4.15928e-12	8.31261e-11
147339	C18orf25	chromosome 18 open reading frame 25	5.45048	5.34162	5.16202	7.32207	7.12838	7.12838	3.66777	1.8749	3.66777	up	3.30472e-10	2.57827e-09
90529	STPG1	sperm-tail PG-rich repeat containing 1	6.68294	6.6912	6.65196	5.4575	5.73716	5.35868	-2.23084	-1.15759	2.23084	down	1.13087e-07	3.93894e-07
2171	FABP5	fatty acid binding protein 5 (psoriasis-associated)	8.85118	8.82547	8.73364	5.76875	6.155	6.16402	-6.84084	-2.77417	6.84084	down	4.69686e-12	9.12942e-11
2804	GOLGB1	golgin B1	8.57022	8.51964	8.62157	10.4779	10.4802	10.4892	3.76315	1.91194	3.76315	up	1.42942e-14	1.80769e-12
1979	EIF4EBP2	eukaryotic translation initiation factor 4E binding protein 2	6.57392	6.52455	6.6063	5.27676	5.2674	5.27684	-2.45307	-1.29459	2.45307	down	2.25843e-09	1.28592e-08
90135	BTBD6	BTB (POZ) domain containing 6	7.90057	7.90741	8.08916	6.02462	6.1382	5.89788	-3.85166	-1.94548	3.85166	down	3.8898e-11	4.57147e-10
146198	ZFP90	ZFP90 zinc finger protein	7.80048	7.61396	7.7169	5.62473	5.31391	5.29426	-4.9228	-2.29948	4.9228	down	4.33344e-11	4.96976e-10
56985	ADPRM	ADP-ribose/CDP-alcohol diphosphatase, manganese-dependent	6.75131	6.63772	6.42905	7.694	7.7402	7.75867	2.18091	1.12493	2.18091	up	1.60857e-08	7.01463e-08
26255	PTTG3P	pituitary tumor-transforming 3, pseudogene	5.39017	5.16748	5.29296	4.42384	4.16632	4.23544	-2.01159	-1.00834	2.01159	down	1.08005e-06	3.07186e-06
283537	SLC46A3	solute carrier family 46, member 3	7.21986	7.23442	7.4788	6.00069	6.29497	6.20819	-2.20852	-1.14308	2.20852	down	8.38321e-08	3.01732e-07
388962	BOLA3	bolA family member 3	11.4492	11.3697	11.3491	9.75451	9.74373	9.76283	-3.10723	-1.63563	3.10723	down	2.92719e-14	2.72997e-12
4085	MAD2L1	MAD2 mitotic arrest deficient-like 1 (yeast)	9.74828	9.66283	9.50981	6.68597	7.27365	7.28099	-5.8975	-2.5601	5.8975	down	3.59025e-10	2.75414e-09
10120	ACTR1B	ARP1 actin-related protein 1 homolog B, centractin beta (yeast)	9.2263	9.33056	9.35887	7.42031	7.52	7.46891	-3.56896	-1.8355	3.56896	down	5.2816e-13	1.89346e-11
6272	SORT1	sortilin 1	9.1357	9.08396	9.20695	7.98413	7.91792	7.83154	-2.34731	-1.23101	2.34731	down	6.75726e-11	7.04668e-10
55500	ETNK1	ethanolamine kinase 1	5.84349	5.85425	5.9208	8.40627	8.56009	8.57755	6.24106	2.64179	6.24106	up	1.39332e-13	7.52026e-12
9586	CREB5	cAMP responsive element binding protein 5	6.39315	6.54585	6.67681	4.97366	5.13392	5.36412	-2.60516	-1.38137	2.60516	down	6.49629e-08	2.40393e-07
8315	BRAP	BRCA1 associated protein	7.92805	7.73979	7.86883	9.44384	9.46933	9.42202	3.0304	1.59951	3.0304	up	3.09765e-12	6.68398e-11
727851	RGPD8	RANBP2-like and GRIP domain containing 8	5.95084	5.87509	5.83524	6.92419	7.52456	7.63288	2.77692	1.47349	2.77692	up	5.13979e-07	1.5519e-06
27350	APOBEC3C	apolipoprotein B mRNA editing enzyme, catalytic polypeptide-like 3C	9.34548	8.88059	9.38384	7.66103	7.36743	7.55513	-3.19417	-1.67544	3.19417	down	1.08429e-08	4.96612e-08
3148	HMGB2	high mobility group box 2	11.5728	11.6167	11.5898	10.3342	10.3475	10.4139	-2.34227	-1.22791	2.34227	down	3.99991e-13	1.57565e-11
23036	ZNF292	zinc finger protein 292	8.21167	8.13005	8.11893	9.2696	9.24804	9.32065	2.18235	1.12588	2.18235	up	3.18757e-11	3.90778e-10
1749	DLX5	distal-less homeobox 5	6.75179	6.55388	6.86213	5.61418	5.29177	5.49525	-2.38755	-1.25553	2.38755	down	9.53163e-08	3.38422e-07
57001	SDHAF3	succinate dehydrogenase complex assembly factor 3	8.10643	8.10232	7.98204	4.72723	4.73296	4.53998	-10.5332	-3.39687	10.5332	down	8.35556e-14	5.36142e-12
57336	ZNF287	zinc finger protein 287	6.64066	6.71625	6.58366	5.17169	5.11634	5.02449	-2.91336	-1.54268	2.91336	down	7.81851e-10	5.24955e-09
55848	PLGRKT	plasminogen receptor, C-terminal lysine transmembrane protein	10.4184	10.2645	10.3326	7.34592	7.39926	7.40872	-7.74825	-2.95387	7.74825	down	1.07127e-15	3.94926e-13
26353	HSPB8	heat shock protein family B (small) member 8	7.94877	7.82539	7.93911	9.1115	8.98161	9.0344	2.20088	1.13808	2.20088	up	1.50626e-10	1.34691e-09
113452	TMEM54	transmembrane protein 54	8.4507	8.37258	8.50847	7.19641	7.05786	7.13144	-2.48862	-1.31535	2.48862	down	9.92736e-11	9.61416e-10
79822	ARHGAP28	Rho GTPase activating protein 28	4.93117	4.8743	4.83651	3.84194	3.53428	3.53898	-2.36569	-1.24226	2.36569	down	2.06694e-07	6.78623e-07
1020	CDK5	cyclin-dependent kinase 5	7.22609	7.21772	7.3853	6.26416	6.15792	6.14129	-2.12665	-1.08858	2.12665	down	1.04417e-08	4.80262e-08
5634	PRPS2	phosphoribosyl pyrophosphate synthetase 2	10.1165	10.1423	10.1797	8.99328	9.04787	8.97709	-2.20391	-1.14006	2.20391	down	4.3626e-12	8.61866e-11
25941	TPGS2	tubulin polyglutamylase complex subunit 2	10.3636	10.3879	10.3149	9.16863	9.29631	9.27677	-2.15581	-1.10823	2.15581	down	1.91533e-11	2.64935e-10
4893	NRAS	neuroblastoma RAS viral (v-ras) oncogene homolog	10.5103	10.5141	10.5141	8.98321	8.97057	8.93776	-2.92608	-1.54897	2.92608	down	4.49541e-14	3.59237e-12
200058	FLJ23867	uncharacterized protein FLJ23867	7.51397	7.55739	7.59221	6.41877	6.49207	6.48014	-2.13001	-1.09086	2.13001	down	1.43751e-09	8.75799e-09
90843	TCEAL8	transcription elongation factor A (SII)-like 8	10.9249	10.8978	10.8619	9.56384	9.67164	9.65783	-2.40117	-1.26374	2.40117	down	1.4918e-12	3.91767e-11
641	BLM	Bloom syndrome, RecQ helicase-like	7.46079	7.48422	7.62183	5.72482	5.28265	5.26149	-4.28499	-2.09929	4.28499	down	8.61744e-10	5.69979e-09
4314	MMP3	matrix metallopeptidase 3	8.1893	8.25125	8.14894	10.7978	10.927	10.9556	6.48448	2.69699	6.48448	up	2.93299e-15	6.90436e-13
11167	FSTL1	follistatin like 1	9.70573	9.67021	9.71299	8.33381	8.28595	8.29738	-2.62187	-1.3906	2.62187	down	6.76762e-13	2.23549e-11
2110	ETFDH	electron-transferring-flavoprotein dehydrogenase	7.58073	7.55238	7.57702	6.57821	6.52586	6.48645	-2.05604	-1.03987	2.05604	down	1.95998e-09	1.14058e-08
5378	PMS1	PMS1 homolog 1, mismatch repair system component	9.18739	8.94794	9.01003	7.07077	7.22995	7.30875	-3.59327	-1.8453	3.59327	down	2.75532e-11	3.50538e-10
9860	LRIG2	leucine-rich repeats and immunoglobulin-like domains 2	5.96861	6.15062	6.11138	7.44725	7.26159	7.24401	2.36321	1.24075	2.36321	up	6.30301e-09	3.10401e-08
5698	PSMB9	proteasome subunit beta 9	8.52118	8.40994	8.65136	5.58048	5.33525	5.30846	-8.69044	-3.11943	8.69044	down	5.20013e-13	1.87333e-11
55071	C9orf40	chromosome 9 open reading frame 40	8.05402	8.06168	8.01889	5.16919	5.72325	5.39203	-6.13348	-2.61671	6.13348	down	6.50332e-11	6.82779e-10
54443	ANLN	anillin actin binding protein	11.6349	11.6663	11.3193	8.4029	8.57197	8.66831	-7.95811	-2.99243	7.95811	down	5.69326e-13	1.99172e-11
7329	UBE2I	ubiquitin conjugating enzyme E2I	8.34185	8.15419	8.38481	7.02722	7.04414	7.0131	-2.40404	-1.26546	2.40404	down	4.87348e-10	3.54154e-09
3783	KCNN4	potassium channel, calcium activated intermediate/small conductance subfamily N alpha, member 4	8.63518	8.62547	8.67232	7.62594	7.57871	7.59571	-2.06223	-1.0442	2.06223	down	1.04715e-10	1.00364e-09
7697	ZNF138	zinc finger protein 138	5.26255	5.32622	5.36158	3.56623	3.57852	3.8259	-3.15995	-1.6599	3.15995	down	4.75245e-09	2.42222e-08
57462	KIAA1161	KIAA1161	6.34849	6.28027	6.40496	5.27992	5.10648	5.03483	-2.30404	-1.20416	2.30404	down	3.24282e-08	1.30303e-07
3575	IL7R	interleukin 7 receptor	8.79115	8.79528	8.86347	7.27128	7.19583	7.24689	-2.98687	-1.57863	2.98687	down	2.03623e-12	4.8607e-11
10549	PRDX4	peroxiredoxin 4	12.043	12.0531	12.0157	10.6703	10.7447	10.7682	-2.47863	-1.30954	2.47863	down	2.0626e-13	9.84129e-12
26118	WSB1	WD repeat and SOCS box containing 1	6.34949	6.49973	6.39684	7.80947	7.81526	7.74446	2.59256	1.37438	2.59256	up	1.73164e-10	1.51043e-09
10437	IFI30	interferon, gamma-inducible protein 30	8.27939	8.24471	8.33505	7.27397	7.26831	7.28108	-2.01661	-1.01193	2.01661	down	4.19916e-10	3.1315e-09
10658	CELF1	CUGBP, Elav-like family member 1	7.81836	7.97609	7.98559	9.10589	9.09072	9.14121	2.27509	1.18593	2.27509	up	9.9852e-11	9.66299e-10
51529	ANAPC11	anaphase promoting complex subunit 11	11.6838	11.7391	11.7986	10.7062	10.5734	10.5746	-2.17715	-1.12244	2.17715	down	1.82621e-11	2.55415e-10
128	ADH5	alcohol dehydrogenase 5 (class III), chi polypeptide	8.52798	8.54438	8.41267	7.40459	7.34668	7.32121	-2.20002	-1.13752	2.20002	down	2.42488e-10	1.99572e-09
723972	ANP32AP1	acidic nuclear phosphoprotein 32 family member A pseudogene 1	9.5337	9.52955	9.49972	6.85338	6.89364	6.82092	-6.34232	-2.66501	6.34232	down	2.44234e-15	6.23786e-13
26610	ELP4	elongator acetyltransferase complex subunit 4	8.0818	8.09065	7.93859	6.91433	6.94566	6.99168	-2.12352	-1.08646	2.12352	down	1.30665e-09	8.06252e-09
440533	PSG8	pregnancy specific beta-1-glycoprotein 8	7.80417	7.86642	7.74493	6.62869	6.68285	6.58904	-2.25269	-1.17165	2.25269	down	6.26533e-10	4.35951e-09
10202	DHRS2	dehydrogenase/reductase (SDR family) member 2	8.24134	8.31214	8.42619	5.99881	5.66161	5.64879	-5.88409	-2.55682	5.88409	down	1.05678e-11	1.68831e-10
27445	PCLO	piccolo presynaptic cytomatrix protein	5.08267	4.81441	4.99558	6.07543	6.4837	6.26689	2.48134	1.31112	2.48134	up	1.50718e-07	5.10319e-07
56895	AGPAT4	1-acylglycerol-3-phosphate O-acyltransferase 4	5.76205	5.80736	5.79882	4.53549	4.32815	4.35307	-2.60962	-1.38384	2.60962	down	1.02351e-08	4.72154e-08
22931	RAB18	RAB18, member RAS oncogene family	9.02851	9.03651	8.85619	9.78124	10.0614	10.1532	2.03482	1.0249	2.03482	up	5.50158e-08	2.07695e-07
9173	IL1RL1	interleukin 1 receptor-like 1	3.52255	3.77626	3.77256	4.72719	4.87165	4.80982	2.1621	1.11243	2.1621	up	4.73571e-07	1.44047e-06
80018	NAA25	N(alpha)-acetyltransferase 25, NatB auxiliary subunit	8.71763	8.41444	8.68929	9.88924	9.90479	9.85092	2.4192	1.27453	2.4192	up	6.70387e-10	4.61048e-09
5266	PI3	peptidase inhibitor 3, skin-derived	4.10703	4.06403	3.83533	6.16494	6.47305	6.1624	4.80543	2.26467	4.80543	up	4.0742e-10	3.05698e-09
11199	ANXA10	annexin A10	4.39102	4.06764	4.05572	6.45207	6.38051	6.25587	4.56735	2.19136	4.56735	up	3.70362e-10	2.82393e-09
284252	KCTD1	potassium channel tetramerization domain containing 1	6.87058	6.61314	6.8464	5.07302	5.37879	5.00987	-3.07975	-1.62281	3.07975	down	1.03823e-08	4.7781e-08
1786	DNMT1	DNA (cytosine-5-)-methyltransferase 1	10.1749	10.0716	10.0744	9.05203	8.97129	9.04627	-2.11958	-1.08378	2.11958	down	2.54767e-11	3.30419e-10
84705	GTPBP3	GTP binding protein 3 (mitochondrial)	7.9919	7.98475	8.01033	6.87325	6.95251	6.83865	-2.15475	-1.10752	2.15475	down	4.66065e-10	3.41376e-09
353376	TICAM2	toll-like receptor adaptor molecule 2	6.76573	6.73216	6.59975	8.11205	8.32131	8.24474	2.8815	1.52682	2.8815	up	1.33208e-10	1.21735e-09
162514	TRPV3	transient receptor potential cation channel, subfamily V, member 3	5.27563	5.08553	5.1548	5.91916	6.58876	6.19074	2.08623	1.0609	2.08623	up	1.08387e-05	2.58006e-05
79642	ARSJ	arylsulfatase family member J	8.0818	8.17185	7.99772	6.50938	7.01008	6.80221	-2.47924	-1.3099	2.47924	down	5.39757e-08	2.04282e-07
1871	E2F3	E2F transcription factor 3	8.21467	8.13309	8.20836	9.43918	9.39516	9.40003	2.33931	1.22608	2.33931	up	6.9632e-12	1.22238e-10
28988	DBNL	drebrin-like	8.57598	8.56454	8.75252	6.97358	6.83337	6.67857	-3.48826	-1.80251	3.48826	down	7.18027e-11	7.41394e-10
145773	FAM81A	family with sequence similarity 81 member A	5.22835	5.03981	5.36005	4.33022	4.1956	4.06913	-2.01543	-1.01109	2.01543	down	2.01945e-06	5.46495e-06
133308	SLC9B2	solute carrier family 9, subfamily B (NHA2, cation proton antiporter 2), member 2	8.713	8.76245	8.85932	7.60138	7.69071	7.57519	-2.22812	-1.15583	2.22812	down	2.00175e-10	1.70419e-09
149076	ZNF362	zinc finger protein 362	8.63005	8.68366	8.62593	5.96813	6.29671	6.23281	-5.58154	-2.48066	5.58154	down	2.42169e-12	5.52759e-11
342371	ATXN1L	ataxin 1-like	8.3621	8.40228	8.34379	10.2438	10.2995	10.2595	3.7275	1.89821	3.7275	up	1.43928e-14	1.81428e-12
26151	NAT9	N-acetyltransferase 9 (GCN5-related, putative)	8.20995	8.35431	8.36214	9.84018	9.83628	9.82015	2.87468	1.5234	2.87468	up	1.74192e-12	4.37461e-11
56300	IL36G	interleukin 36, gamma	3.08361	3.75714	4.12843	5.28749	5.00944	4.69875	2.53532	1.34217	2.53532	up	8.54584e-05	0.00017782
5007	OSBP	oxysterol binding protein	7.55276	7.54235	7.36284	9.05271	9.09737	9.21743	3.10915	1.63652	3.10915	up	1.90199e-11	2.6328e-10
79884	MAP9	microtubule associated protein 9	8.80768	8.69876	8.69322	6.85467	6.83733	6.86625	-3.68195	-1.88047	3.68195	down	6.22108e-13	2.11209e-11
27125	AFF4	AF4/FMR2 family member 4	5.93468	6.15702	6.11346	9.17744	9.25181	9.22101	8.86651	3.14837	8.86651	up	1.63519e-14	1.9422e-12
4063	LY9	lymphocyte antigen 9	5.20581	4.95924	5.08991	6.20995	6.24691	6.09303	2.14104	1.09831	2.14104	up	1.14779e-07	3.99112e-07
27154	BRPF3	bromodomain and PHD finger containing 3	7.55413	7.5746	7.59296	9.01532	9.19575	9.1364	2.91183	1.54193	2.91183	up	5.72877e-12	1.05584e-10
51514	DTL	denticleless E3 ubiquitin protein ligase homolog (Drosophila)	8.83952	8.87197	8.84842	7.43753	7.71396	7.64165	-2.38765	-1.25559	2.38765	down	5.6502e-10	4.0115e-09
728378	POTEF	POTE ankyrin domain family member F	9.7641	10.0177	10.1	9.02679	8.99633	8.83567	-2.01067	-1.00768	2.01067	down	3.48312e-08	1.38718e-07
3976	LIF	leukemia inhibitory factor	5.5742	5.44013	5.76241	6.87125	7.03848	6.83879	2.50347	1.32393	2.50347	up	2.0267e-08	8.59812e-08
9467	SH3BP5	SH3-domain binding protein 5 (BTK-associated)	9.11645	8.99988	9.01075	10.3559	10.432	10.4905	2.60949	1.38377	2.60949	up	3.75235e-12	7.70119e-11
152002	XXYLT1	xyloside xylosyltransferase 1	7.39327	7.44603	7.51124	6.0493	6.17464	5.97674	-2.60862	-1.38329	2.60862	down	7.17279e-10	4.87463e-09
261729	STEAP2	STEAP2 metalloreductase	8.58047	8.29523	8.2089	6.13721	6.30416	6.24332	-4.38721	-2.1333	4.38721	down	4.97952e-11	5.53899e-10
26207	PITPNC1	phosphatidylinositol transfer protein, cytoplasmic 1	6.23691	6.08985	6.37123	8.25093	8.14543	8.18349	3.89229	1.96062	3.89229	up	1.82373e-11	2.55159e-10
3570	IL6R	interleukin 6 receptor	5.43553	5.32204	5.24947	7.36398	7.41927	7.32607	4.09565	2.03409	4.09565	up	1.58307e-11	2.28863e-10
7852	CXCR4	chemokine (C-X-C motif) receptor 4	3.94509	4.19797	3.8755	5.00956	4.98198	5.18532	2.0745	1.05277	2.0745	up	1.37056e-06	3.82142e-06
4522	MTHFD1	methylenetetrahydrofolate dehydrogenase (NADP+ dependent) 1, methenyltetrahydrofolate cyclohydrolase, formyltetrahydrofolate synthetase	10.4313	10.2929	10.3159	9.02306	9.02244	9.03173	-2.49833	-1.32097	2.49833	down	2.40473e-12	5.49852e-11
79791	FBXO31	F-box protein 31	7.74664	7.65132	7.82989	9.04727	9.01892	9.02126	2.43941	1.28653	2.43941	up	3.64713e-11	4.35438e-10
80790	CMIP	c-Maf inducing protein	6.39349	6.48779	6.51542	7.3817	7.5408	7.63406	2.07525	1.05329	2.07525	up	2.02424e-08	8.59144e-08
401509	ZNF658B	zinc finger protein 658B, pseudogene	5.95416	5.74284	5.80766	4.34501	4.60961	4.58247	-2.50103	-1.32252	2.50103	down	5.15103e-08	1.96014e-07
126272	EID2B	EP300 interacting inhibitor of differentiation 2B	6.95191	6.96305	7.13137	4.88495	5.11923	5.041	-4.00106	-2.00038	4.00106	down	1.12538e-10	1.06326e-09
2558	GABRA5	gamma-aminobutyric acid (GABA) A receptor, alpha 5	7.97	7.85417	7.76999	6.46333	6.21607	6.28958	-2.91143	-1.54173	2.91143	down	4.70373e-10	3.43823e-09
1287	COL4A5	collagen, type IV, alpha 5	6.41305	6.31764	6.2313	5.11797	5.02085	4.84751	-2.50571	-1.32522	2.50571	down	2.11535e-08	8.92577e-08
55890	GPRC5C	G protein-coupled receptor, class C, group 5, member C	7.14982	7.03247	7.29662	9.09041	9.04818	9.04922	3.73981	1.90297	3.73981	up	3.96645e-12	8.0476e-11
55075	UACA	uveal autoantigen with coiled-coil domains and ankyrin repeats	9.77518	9.77288	9.76515	7.60314	7.55665	7.47261	-4.68139	-2.22694	4.68139	down	1.71812e-14	1.99502e-12
6678	SPARC	secreted protein, acidic, cysteine-rich (osteonectin)	12.3341	12.3689	12.3201	11.0099	10.9801	11.0198	-2.52764	-1.33779	2.52764	down	3.96886e-14	3.30685e-12
54148	MRPL39	mitochondrial ribosomal protein L39	9.37075	9.31319	9.27731	8.19025	8.31877	8.36129	-2.04247	-1.03031	2.04247	down	3.90093e-10	2.94721e-09
7349	UCN	urocortin	6.62915	6.67378	6.46878	5.39228	5.59454	5.5919	-2.0912	-1.06433	2.0912	down	1.15037e-07	3.9991e-07
9837	GINS1	GINS complex subunit 1 (Psf1 homolog)	10.0776	10.0059	9.99053	6.67737	6.69909	6.8429	-9.74663	-3.2849	9.74663	down	1.31954e-15	4.26066e-13
2309	FOXO3	forkhead box O3	7.2904	7.38381	7.58896	8.73187	8.59452	8.56503	2.31244	1.20942	2.31244	up	3.84754e-09	2.0184e-08
23043	TNIK	TRAF2 and NCK interacting kinase	8.30978	8.19258	8.30664	7.16396	7.22384	7.28672	-2.06312	-1.04483	2.06312	down	1.11863e-09	7.06981e-09
160428	ALDH1L2	aldehyde dehydrogenase 1 family member L2	5.18845	5.08367	5.23661	3.99268	4.29948	4.10988	-2.04991	-1.03556	2.04991	down	8.97582e-07	2.58836e-06
54823	SWT1	SWT1, RNA endoribonuclease homolog	5.1506	4.92214	5.41641	6.4852	6.57998	6.54212	2.58958	1.37272	2.58958	up	8.69863e-08	3.11771e-07
84300	UQCC2	ubiquinol-cytochrome c reductase complex assembly factor 2	10.7721	10.6349	10.7095	8.6382	8.65771	8.6709	-4.14069	-2.04987	4.14069	down	1.33117e-14	1.73387e-12
28978	TMEM14A	transmembrane protein 14A	10.5133	10.4745	10.5777	7.06853	7.04721	6.97515	-11.2474	-3.49152	11.2474	down	1.01604e-16	9.15319e-14
57018	CCNL1	cyclin L1	7.60685	7.67401	7.74247	9.35721	9.418	9.38355	3.27572	1.71181	3.27572	up	5.84976e-13	2.02831e-11
6840	SVIL	supervillin	7.79909	7.65738	7.66081	8.76293	8.85435	8.85635	2.17164	1.11878	2.17164	up	2.70566e-10	2.1872e-09
1848	DUSP6	dual specificity phosphatase 6	6.63574	6.84442	6.72653	8.09773	8.185	8.12723	2.64101	1.40109	2.64101	up	1.61466e-10	1.42884e-09
10137	RBM12	RNA binding motif protein 12	6.77427	6.79473	6.84885	4.89484	4.92627	4.99361	-3.64953	-1.86771	3.64953	down	5.25575e-11	5.78859e-10
63934	ZNF667	zinc finger protein 667	6.09551	5.85225	5.83296	7.21593	7.14403	7.11859	2.34992	1.23261	2.34992	up	1.04572e-08	4.80803e-08
55250	ELP2	elongator acetyltransferase complex subunit 2	8.81849	8.90918	8.95576	10.0862	10.0697	10.124	2.29553	1.19883	2.29553	up	9.28469e-12	1.52959e-10
196383	RILPL2	Rab interacting lysosomal protein-like 2	6.87044	6.88031	7.19033	8.29396	8.5	8.56517	2.77538	1.47268	2.77538	up	3.95486e-09	2.06775e-08
122809	SOCS4	suppressor of cytokine signaling 4	4.75241	4.4947	4.5179	5.55837	5.93659	5.64299	2.17998	1.12431	2.17998	up	1.0377e-06	2.96073e-06
55738	ARFGAP1	ADP ribosylation factor GTPase activating protein 1	6.0603	6.1437	6.37098	7.27233	7.17155	7.32124	2.08982	1.06338	2.08982	up	7.54798e-08	2.74707e-07
113251	LARP4	La ribonucleoprotein domain family member 4	7.08029	6.98515	7.00417	8.42361	8.49953	8.62986	2.81759	1.49446	2.81759	up	4.7553e-11	5.33207e-10
130074	FAM168B	family with sequence similarity 168 member B	6.33234	6.35368	6.19149	7.61609	7.69071	7.67502	2.58131	1.3681	2.58131	up	3.11405e-10	2.44943e-09
896	CCND3	cyclin D3	8.74793	8.84842	8.9236	7.23797	7.04467	6.95809	-3.38637	-1.75974	3.38637	down	4.47553e-11	5.09142e-10
29083	GTPBP8	GTP-binding protein 8 (putative)	9.07876	9.0826	9.08691	7.9134	7.8835	7.93792	-2.25191	-1.17115	2.25191	down	1.10309e-11	1.7494e-10
1842	ECM2	extracellular matrix protein 2, female organ and adipocyte specific	7.23294	7.12448	7.01457	4.43285	3.77082	4.05024	-8.22126	-3.03936	8.22126	down	1.54157e-10	1.37377e-09
84681	HINT2	histidine triad nucleotide binding protein 2	9.85548	9.83909	9.96493	8.33843	8.41779	8.14941	-2.99929	-1.58462	2.99929	down	3.02992e-11	3.76113e-10
56658	TRIM39	tripartite motif containing 39	7.11173	7.17024	6.83213	8.24136	8.23678	8.20995	2.28363	1.19133	2.28363	up	8.01437e-09	3.8269e-08
10301	DLEU1	deleted in lymphocytic leukemia 1 (non-protein coding)	8.95953	8.89857	8.83871	7.82926	7.85996	7.8338	-2.08194	-1.05793	2.08194	down	1.16473e-10	1.09409e-09
285189	PLGLA	plasminogen-like A (pseudogene)	5.30985	5.09053	5.47096	7.50801	7.56744	7.49589	4.70219	2.23333	4.70219	up	5.10447e-11	5.64903e-10
1082	CGB	chorionic gonadotropin, beta polypeptide	8.4116	8.31551	8.31904	7.23925	7.34161	7.40746	-2.0269	-1.01928	2.0269	down	1.76636e-09	1.04234e-08
25804	LSM4	LSM4 homolog, U6 small nuclear RNA and mRNA degradation associated	10.9658	10.9086	11.0186	8.81521	8.73947	8.7989	-4.53093	-2.17981	4.53093	down	4.6473e-15	8.85865e-13
144245	ALG10B	ALG10B, alpha-1,2-glucosyltransferase	5.23568	5.03856	5.15593	3.27875	3.9199	3.40593	-3.04941	-1.60853	3.04941	down	3.108e-07	9.82377e-07
1768	DNAH6	dynein, axonemal, heavy chain 6	5.41786	5.29084	5.42339	6.34926	6.44674	6.48785	2.07137	1.05059	2.07137	up	5.37215e-08	2.03517e-07
6617	SNAPC1	small nuclear RNA activating complex polypeptide 1	7.81798	7.88189	7.68519	5.26411	5.6294	5.66554	-4.84111	-2.27534	4.84111	down	1.2267e-10	1.13861e-09
9358	ITGBL1	integrin beta like 1	8.31046	8.21076	8.30266	5.56115	5.50549	5.29533	-7.06474	-2.82064	7.06474	down	5.14306e-13	1.86434e-11
471	ATIC	5-aminoimidazole-4-carboxamide ribonucleotide formyltransferase/IMP cyclohydrolase	10.6453	10.6669	10.6841	9.62782	9.60474	9.61877	-2.06811	-1.04831	2.06811	down	2.12635e-12	5.04194e-11
80178	C16orf59	chromosome 16 open reading frame 59	7.86611	7.43731	7.91741	5.31067	5.07646	5.38777	-5.58662	-2.48198	5.58662	down	3.12925e-10	2.45941e-09
41	ASIC1	acid sensing ion channel 1	6.61813	6.90156	6.86356	5.89636	5.57393	5.21709	-2.34885	-1.23196	2.34885	down	3.03849e-06	7.94799e-06
143903	LAYN	layilin	4.78779	4.31788	4.68883	3.25357	3.87305	3.57034	-2.04558	-1.03251	2.04558	down	5.45671e-05	0.000116814
9274	BCL7C	B-cell CLL/lymphoma 7C	9.74747	9.70219	9.94423	8.61301	8.47936	8.43812	-2.44155	-1.2878	2.44155	down	3.61216e-10	2.76823e-09
102724428	LOC102724428	serine/threonine-protein kinase SIK1	8.47479	8.49135	8.57907	10.2189	10.2826	10.2968	3.36599	1.75103	3.36599	up	1.08029e-13	6.35687e-12
51265	CDKL3	cyclin-dependent kinase-like 3	3.80772	3.49722	3.80772	5.00722	4.90695	5.08767	2.45614	1.29639	2.45614	up	1.71407e-07	5.72435e-07
3667	IRS1	insulin receptor substrate 1	9.53806	9.48368	9.41677	7.44389	7.56817	7.5581	-3.88016	-1.95612	3.88016	down	2.78433e-13	1.21027e-11
55055	ZWILCH	zwilch kinetochore protein	9.77386	9.64726	9.64373	8.2848	8.22494	8.2657	-2.6941	-1.4298	2.6941	down	3.02815e-12	6.57761e-11
10214	SSX3	synovial sarcoma, X breakpoint 3	7.56993	7.66148	7.38125	6.36654	6.44953	6.56583	-2.10953	-1.07692	2.10953	down	4.11027e-08	1.60392e-07
84310	C7orf50	chromosome 7 open reading frame 50	10.4338	10.4589	10.4938	7.68383	7.54289	7.6073	-7.21414	-2.85083	7.21414	down	8.99085e-16	3.62714e-13
8291	DYSF	dysferlin	8.3577	8.41466	8.45199	7.19321	7.44082	7.44792	-2.0669	-1.04747	2.0669	down	8.57259e-09	4.05509e-08
5255	PHKA1	phosphorylase kinase, alpha 1 (muscle)	6.98611	6.84712	7.02049	5.78403	5.74722	5.88425	-2.21311	-1.14607	2.21311	down	1.1624e-08	5.27624e-08
54741	LEPROT	leptin receptor overlapping transcript	11.4053	11.4064	11.3506	9.84311	10.087	10.0966	-2.60003	-1.37853	2.60003	down	4.83413e-11	5.39262e-10
149111	CNIH3	cornichon family AMPA receptor auxiliary protein 3	5.56456	5.34298	5.57168	6.7272	6.70725	6.715	2.33498	1.22341	2.33498	up	1.26741e-08	5.68422e-08
3508	IGHMBP2	immunoglobulin mu binding protein 2	6.84699	6.8091	6.96422	8.29405	8.22938	8.20568	2.58399	1.3696	2.58399	up	8.40091e-11	8.413e-10
113835	ZNF257	zinc finger protein 257	5.41877	5.31233	4.99767	3.25404	4.00077	4.14543	-2.71856	-1.44284	2.71856	down	1.48859e-05	3.45918e-05
25999	CLIP3	CAP-Gly domain containing linker protein 3	6.28912	6.38347	6.27181	7.39148	7.37741	7.47421	2.1429	1.09957	2.1429	up	2.99773e-09	1.62991e-08
64746	ACBD3	acyl-CoA binding domain containing 3	8.64842	8.61721	8.7028	10.0641	10.0818	10.0525	2.65738	1.41001	2.65738	up	4.68481e-13	1.73872e-11
9830	TRIM14	tripartite motif containing 14	8.22429	8.27602	8.35581	6.53856	6.58995	6.69931	-3.19563	-1.6761	3.19563	down	1.605e-11	2.31115e-10
57610	RANBP10	RAN binding protein 10	6.68759	6.65115	6.76999	7.77473	7.83845	7.74491	2.11861	1.08312	2.11861	up	1.43802e-09	8.75969e-09
51517	NCKIPSD	NCK interacting protein with SH3 domain	8.81606	8.83177	8.86563	7.82114	7.68054	7.70977	-2.14454	-1.10067	2.14454	down	1.52249e-10	1.35889e-09
10285	SMNDC1	survival motor neuron domain containing 1	9.31774	9.29865	9.28852	10.1571	10.425	10.372	2.0229	1.01643	2.0229	up	1.65127e-09	9.84655e-09
1404	HAPLN1	hyaluronan and proteoglycan link protein 1	8.62458	8.47338	8.57429	5.73495	5.31549	5.38028	-8.45913	-3.08051	8.45913	down	2.40123e-12	5.49372e-11
3875	KRT18	keratin 18, type I	10.8328	10.9089	11.128	9.75352	9.58072	9.60381	-2.48039	-1.31057	2.48039	down	5.17952e-10	3.7295e-09
55108	BSDC1	BSD domain containing 1	6.50017	6.56125	6.73663	8.37765	8.39967	8.40633	3.47064	1.7952	3.47064	up	1.25026e-11	1.92121e-10
55030	FBXO34	F-box protein 34	8.01188	7.95952	8.00057	9.06681	9.13595	9.04922	2.13367	1.09334	2.13367	up	4.35021e-11	4.98514e-10
4600	MX2	MX dynamin-like GTPase 2	4.93398	4.87969	4.7922	3.50657	3.56006	3.95315	-2.29002	-1.19536	2.29002	down	1.10649e-06	3.14003e-06
159686	CFAP58	cilia and flagella associated protein 58	6.81112	6.76003	6.81112	4.15479	3.21255	3.68998	-8.62376	-3.10832	8.62376	down	1.62978e-09	9.74548e-09
54331	GNG2	guanine nucleotide binding protein (G protein), gamma 2	7.77149	7.72315	7.72538	6.58105	6.45464	6.65905	-2.25807	-1.17509	2.25807	down	1.57471e-09	9.46512e-09
84246	MED10	mediator complex subunit 10	10.0374	10.1229	10.1473	11.1376	11.1069	11.0962	2.01541	1.01108	2.01541	up	1.04526e-11	1.67194e-10
10208	USPL1	ubiquitin specific peptidase like 1	6.55432	6.30898	6.3912	7.7412	7.76663	7.81961	2.56267	1.35765	2.56267	up	7.30573e-10	4.95325e-09
9980	DOPEY2	dopey family member 2	8.16212	8.18638	8.00664	6.84257	7.00406	6.96146	-2.26946	-1.18235	2.26946	down	1.52566e-09	9.21546e-09
642424	IGKV1OR10-1	immunoglobulin kappa variable 1/OR10-1 (pseudogene)	4.33327	3.91581	4.50467	5.51813	5.11034	5.24827	2.05765	1.041	2.05765	up	2.58944e-05	5.81304e-05
6788	STK3	serine/threonine kinase 3	7.40505	7.34807	7.37302	8.8566	8.71443	8.88753	2.72101	1.44414	2.72101	up	1.97635e-11	2.71435e-10
23636	NUP62	nucleoporin 62kDa	10.7892	10.8504	10.7491	9.86021	9.74551	9.76519	-2.0082	-1.0059	2.0082	down	4.07948e-11	4.74163e-10
9748	SLK	STE20 like kinase	7.76996	7.76112	7.72576	9.62471	9.67315	9.70981	3.77622	1.91694	3.77622	up	4.58243e-14	3.63221e-12
64421	DCLRE1C	DNA cross-link repair 1C	5.78856	5.77796	5.5595	6.80452	6.91809	7.15059	2.37687	1.24906	2.37687	up	6.51771e-08	2.41026e-07
79469	DLEU2L	deleted in lymphocytic leukemia 2-like	8.57039	8.57151	8.3914	5.20932	5.96813	6.24351	-6.51657	-2.70411	6.51657	down	1.55984e-08	6.82575e-08
219854	TMEM218	transmembrane protein 218	8.24252	8.15506	8.38939	6.56411	5.87697	6.19696	-4.14004	-2.04964	4.14004	down	6.58297e-09	3.22562e-08
10138	YAF2	YY1 associated factor 2	6.87682	7.05452	6.98534	7.97977	7.97404	8.08907	2.05918	1.04207	2.05918	up	3.54987e-09	1.88384e-08
6624	FSCN1	fascin actin-bundling protein 1	10.0427	10.0202	10.0909	8.52825	8.62422	8.46401	-2.85291	-1.51243	2.85291	down	1.61383e-12	4.14075e-11
7248	TSC1	tuberous sclerosis 1	8.64266	8.59161	8.56036	9.78263	9.77124	9.78082	2.2658	1.18002	2.2658	up	4.06175e-12	8.18963e-11
8667	EIF3H	eukaryotic translation initiation factor 3 subunit H	3.42132	3.83847	4.09617	4.79488	5.22557	5.20016	2.44226	1.28822	2.44226	up	8.66161e-06	2.09761e-05
54620	FBXL19	F-box and leucine-rich repeat protein 19	6.98908	6.77436	6.71442	7.88198	7.86533	7.88813	2.07416	1.05253	2.07416	up	1.25355e-08	5.63044e-08
284391	ZNF844	zinc finger protein 844	5.59221	5.48339	5.79833	6.8989	6.46172	6.70753	2.09179	1.06474	2.09179	up	1.48729e-06	4.12776e-06
5048	PAFAH1B1	platelet activating factor acetylhydrolase 1b regulatory subunit 1	9.69167	9.70204	9.79779	11.4121	11.3558	11.345	3.1177	1.64048	3.1177	up	6.72152e-14	4.70314e-12
10725	NFAT5	nuclear factor of activated T-cells 5, tonicity-responsive	8.73074	8.68714	8.64357	10.5278	10.5727	10.6186	3.69578	1.88588	3.69578	up	2.48792e-14	2.43051e-12
26040	SETBP1	SET binding protein 1	5.64274	5.52685	5.71167	7.06095	7.0991	7.10074	2.75078	1.45984	2.75078	up	5.41156e-10	3.86807e-09
9693	RAPGEF2	Rap guanine nucleotide exchange factor 2	6.73607	6.92687	6.88437	7.95999	7.98307	7.96489	2.17379	1.12021	2.17379	up	1.36771e-09	8.38765e-09
9289	ADGRG1	adhesion G protein-coupled receptor G1	8.53042	8.52515	8.47618	9.83863	9.79888	9.84734	2.49268	1.3177	2.49268	up	1.10255e-12	3.15301e-11
7581	ZNF33A	zinc finger protein 33A	6.28476	6.1412	6.2129	5.16336	5.20781	5.16752	-2.04683	-1.03339	2.04683	down	5.88681e-08	2.20322e-07
56672	AKIP1	A-kinase interacting protein 1	9.12488	9.09874	9.16222	7.79704	7.69902	7.71216	-2.62541	-1.39254	2.62541	down	4.56692e-12	8.93702e-11
29123	ANKRD11	ankyrin repeat domain 11	9.84137	9.82553	9.85987	11.0046	11.0004	11.03	2.24922	1.16943	2.24922	up	4.37021e-13	1.67001e-11
55968	NSFL1C	NSFL1 (p97) cofactor (p47)	9.75855	9.65392	9.87471	10.856	10.7388	10.7435	2.02377	1.01704	2.02377	up	6.24951e-10	4.35083e-09
147945	NLRP4	NLR family, pyrin domain containing 4	5.68785	5.66411	5.91468	4.93952	4.77735	4.49062	-2.02752	-1.01972	2.02752	down	4.02362e-06	1.02933e-05
1193	CLIC2	chloride intracellular channel 2	6.67811	6.50296	6.58716	5.13431	4.93709	5.12786	-2.87386	-1.52299	2.87386	down	2.27153e-09	1.29225e-08
4008	LMO7	LIM domain 7	7.62158	7.58817	7.75111	4.52059	4.48719	4.16242	-9.60345	-3.26355	9.60345	down	1.96527e-12	4.73962e-11
146227	BEAN1	brain expressed, associated with NEDD4, 1	5.90986	6.112	6.22035	4.47581	4.32871	4.39383	-3.20714	-1.68129	3.20714	down	3.03278e-09	1.64561e-08
1595	CYP51A1	cytochrome P450, family 51, subfamily A, polypeptide 1	10.5197	10.4434	10.4812	12.0437	12.0641	12.0518	2.97274	1.57179	2.97274	up	1.20438e-14	1.65902e-12
10849	CD3EAP	CD3e molecule, epsilon associated protein	9.88733	9.77592	9.64129	8.28681	8.29742	8.45957	-2.67631	-1.42025	2.67631	down	1.21439e-10	1.12987e-09
58491	ZNF71	zinc finger protein 71	6.81514	6.70091	6.75411	7.72046	7.88904	7.78633	2.05892	1.04189	2.05892	up	4.11267e-09	2.13796e-08
10166	SLC25A15	solute carrier family 25 (mitochondrial carrier; ornithine transporter) member 15	8.69848	8.68453	8.73735	6.97354	6.71564	6.78566	-3.68545	-1.88184	3.68545	down	7.62422e-12	1.3122e-10
84288	EFCAB2	EF-hand calcium binding domain 2	7.32637	7.24693	7.36559	5.78925	6.11218	6.18111	-2.43758	-1.28545	2.43758	down	3.20313e-08	1.2892e-07
5723	PSPH	phosphoserine phosphatase	9.87791	9.81471	9.81996	8.39503	8.42593	8.46132	-2.65756	-1.4101	2.65756	down	7.31391e-13	2.35912e-11
255488	RNF144B	ring finger protein 144B	7.01752	7.00296	7.02327	5.60827	5.68732	5.5639	-2.62944	-1.39475	2.62944	down	5.44491e-10	3.88765e-09
54454	ATAD2B	ATPase family, AAA domain containing 2B	4.44098	4.66916	4.52747	5.52373	5.72556	5.74017	2.16938	1.11728	2.16938	up	2.4996e-07	8.06913e-07
146330	FBXL16	F-box and leucine-rich repeat protein 16	7.99459	8.03789	7.9105	6.66204	6.79871	6.71092	-2.39015	-1.2571	2.39015	down	3.51994e-10	2.70978e-09
27242	TNFRSF21	tumor necrosis factor receptor superfamily member 21	10.6492	10.4627	10.4952	9.33124	9.2557	9.32666	-2.34761	-1.23119	2.34761	down	2.81308e-11	3.55826e-10
102724770	LOC102724770	protein DGCR6	8.78584	8.90252	8.95255	7.43674	7.42793	7.44028	-2.72323	-1.44532	2.72323	down	1.16671e-11	1.82366e-10
55013	CCDC109B	coiled-coil domain containing 109B	9.12378	9.0647	9.01384	6.94371	7.09631	6.96932	-4.18239	-2.06433	4.18239	down	4.08256e-13	1.59694e-11
10001	MED6	mediator complex subunit 6	5.01464	5.02903	5.03186	6.13777	6.06736	6.12825	2.12277	1.08595	2.12277	up	2.92724e-08	1.19042e-07
90522	YIF1B	Yip1 interacting factor homolog B (S. cerevisiae)	8.57538	8.68277	8.87571	7.40459	7.34639	7.32474	-2.55392	-1.35271	2.55392	down	5.20812e-10	3.74717e-09
83903	GSG2	germ cell associated 2 (haspin)	6.68542	6.72311	6.74862	5.16897	5.49406	5.30015	-2.63534	-1.39799	2.63534	down	7.71705e-09	3.70056e-08
9052	GPRC5A	G protein-coupled receptor, class C, group 5, member A	7.52699	7.42141	7.44298	6.14861	6.09248	6.23159	-2.47295	-1.30623	2.47295	down	6.24184e-10	4.34627e-09
80746	TSEN2	tRNA splicing endonuclease subunit 2	7.6083	7.61284	7.75881	6.32275	6.26558	6.36981	-2.53257	-1.3406	2.53257	down	4.20151e-10	3.13265e-09
22909	FAN1	FANCD2/FANCI-associated nuclease 1	8.02841	8.01491	8.14996	6.55543	6.60671	6.55199	-2.81483	-1.49305	2.81483	down	3.64021e-11	4.34928e-10
4087	SMAD2	SMAD family member 2	8.8484	8.75229	8.69724	10.0818	10.2156	10.2541	2.67184	1.41783	2.67184	up	1.3704e-11	2.06203e-10
51101	ZC2HC1A	zinc finger, C2HC-type containing 1A	6.70753	6.72393	6.76034	5.25202	5.96809	5.87013	-2.04749	-1.03385	2.04749	down	2.24177e-05	5.07747e-05
7327	UBE2G2	ubiquitin conjugating enzyme E2G 2	8.84172	8.86348	8.9485	7.77673	7.69325	7.67885	-2.24745	-1.16829	2.24745	down	7.31541e-11	7.51681e-10
3315	HSPB1	heat shock protein family B (small) member 1	12.2954	12.2862	12.3625	10.6349	10.5069	10.5511	-3.36459	-1.75043	3.36459	down	3.07867e-14	2.81745e-12
1264	CNN1	calponin 1, basic, smooth muscle	8.47524	8.58968	8.62465	6.80866	6.54656	6.48327	-3.86471	-1.95036	3.86471	down	4.6108e-11	5.20891e-10
79085	SLC25A23	solute carrier family 25 (mitochondrial carrier; phosphate carrier), member 23	7.03821	6.94175	7.04018	5.53195	5.13307	5.52738	-3.05092	-1.60925	3.05092	down	7.45382e-09	3.58887e-08
23011	RAB21	RAB21, member RAS oncogene family	9.56085	9.53576	9.57249	10.5175	10.5693	10.5994	2.00793	1.00571	2.00793	up	8.52052e-12	1.43084e-10
57088	PLSCR4	phospholipid scramblase 4	5.97579	6.02942	5.97489	4.88971	5.12807	4.88073	-2.03806	-1.0272	2.03806	down	2.63066e-07	8.4531e-07
8178	ELL	elongation factor RNA polymerase II	5.00189	5.36158	5.05912	6.69205	6.61664	6.76834	2.93118	1.55148	2.93118	up	7.52774e-09	3.62045e-08
51351	ZNF117	zinc finger protein 117	6.30101	6.38541	6.22114	4.7806	5.19569	5.06137	-2.44522	-1.28997	2.44522	down	1.14057e-07	3.96847e-07
441168	FAM26F	family with sequence similarity 26 member F	3.87613	3.75324	4.01602	5.34437	5.15833	4.98856	2.43169	1.28196	2.43169	up	2.53435e-07	8.16916e-07
56890	MDM1	Mdm1 nuclear protein	5.87053	6.13822	5.81673	3.84937	5.15911	5.00296	-2.41387	-1.27135	2.41387	down	0.000487521	0.000912966
6049	RNF6	ring finger protein (C3H2C3 type) 6	5.37915	5.16743	5.234	6.24717	6.56543	6.59207	2.31022	1.20803	2.31022	up	1.60211e-07	5.38774e-07
9859	CEP170	centrosomal protein 170kDa	6.05203	6.032	6.18053	7.13357	7.30897	7.30249	2.23482	1.16016	2.23482	up	8.07463e-09	3.85077e-08
4191	MDH2	malate dehydrogenase 2	11.6242	11.7293	11.734	10.63	10.6318	10.6206	-2.09701	-1.06833	2.09701	down	3.88316e-12	7.92388e-11
11013	TMSB15A	thymosin beta 15a	9.25216	9.09871	9.27822	5.83312	5.85861	5.99477	-9.94655	-3.3142	9.94655	down	1.33999e-14	1.73387e-12
10241	CALCOCO2	calcium binding and coiled-coil domain 2	8.845	8.84268	8.85728	9.80581	9.92051	9.97948	2.07572	1.05361	2.07572	up	8.98622e-11	8.8765e-10
386593	CHKB-CPT1B	CHKB-CPT1B readthrough (NMD candidate)	6.10263	5.93314	5.96813	4.96069	4.92062	5.04242	-2.03739	-1.02672	2.03739	down	1.41253e-07	4.81316e-07
100506403	LOC100506403	uncharacterized LOC100506403	6.13215	6.20825	6.30867	7.18548	7.28001	7.26318	2.03712	1.02653	2.03712	up	1.41611e-08	6.26782e-08
80208	SPG11	spastic paraplegia 11 (autosomal recessive)	8.42807	8.50748	8.39369	7.23246	7.34668	7.30993	-2.2141	-1.14672	2.2141	down	2.38252e-10	1.96719e-09
28970	C11orf54	chromosome 11 open reading frame 54	5.68936	5.66505	5.66783	6.87162	6.82472	6.77832	2.22038	1.15081	2.22038	up	4.38752e-09	2.26195e-08
25949	SYF2	SYF2 pre-mRNA-splicing factor	8.85604	8.77567	8.9494	10.0056	10.1029	10.1219	2.3237	1.21642	2.3237	up	4.24343e-11	4.88426e-10
414062	CCL3L3	chemokine (C-C motif) ligand 3-like 3	5.75738	5.97167	5.78247	8.40368	8.68661	8.28467	6.15239	2.62115	6.15239	up	1.27382e-11	1.94822e-10
3267	AGFG1	ArfGAP with FG repeats 1	8.8614	8.80582	8.84976	10.1352	10.07	10.0777	2.38721	1.25533	2.38721	up	1.52895e-12	3.98311e-11
64779	MTHFSD	methenyltetrahydrofolate synthetase domain containing	6.24307	6.1245	6.39537	5.13697	5.04346	5.20554	-2.18201	-1.12566	2.18201	down	1.0319e-07	3.62981e-07
1594	CYP27B1	cytochrome P450, family 27, subfamily B, polypeptide 1	6.0507	6.26445	6.20274	7.38005	7.24461	7.28352	2.18873	1.1301	2.18873	up	1.01075e-08	4.67256e-08
730153	NPIP	nuclear pore complex interacting protein family, member A1 pseudogene	7.01376	6.99001	6.99739	8.51855	8.39245	8.4693	2.75054	1.45971	2.75054	up	1.21608e-11	1.885e-10
158219	TTC39B	tetratricopeptide repeat domain 39B	4.63513	4.76305	5.04819	6.39734	6.45089	6.44648	3.06548	1.61611	3.06548	up	7.55363e-09	3.63067e-08
10053	AP1M2	adaptor-related protein complex 1 mu 2 subunit	7.31526	7.21752	7.24989	5.40436	5.54058	5.4025	-3.51066	-1.81174	3.51066	down	4.575e-11	5.17745e-10
23042	PDXDC1	pyridoxal-dependent decarboxylase domain containing 1	5.91002	5.69549	5.98332	8.103	7.86378	7.92597	4.29098	2.10131	4.29098	up	5.19518e-11	5.73319e-10
9947	MAGEC1	MAGE family member C1	9.2781	9.28678	9.40907	7.27691	7.13012	7.11007	-4.44531	-2.15228	4.44531	down	3.89613e-13	1.55356e-11
55572	FOXRED1	FAD-dependent oxidoreductase domain containing 1	8.69848	8.68042	8.77512	7.3694	7.21197	7.30246	-2.68216	-1.4234	2.68216	down	2.42225e-11	3.18916e-10
7029	TFDP2	transcription factor Dp-2 (E2F dimerization partner 2)	5.96337	5.97647	5.97482	7.88377	7.90892	7.9216	3.81904	1.93321	3.81904	up	1.76687e-12	4.42305e-11
2263	FGFR2	fibroblast growth factor receptor 2	6.78248	6.69398	6.80349	5.62059	5.38888	5.36476	-2.46555	-1.30191	2.46555	down	1.06485e-08	4.88622e-08
79753	SNIP1	Smad nuclear interacting protein 1	7.10186	7.12931	6.99832	8.41327	8.47256	8.56853	2.65422	1.40829	2.65422	up	6.01548e-11	6.44309e-10
81691	LOC81691	exonuclease NEF-sp	7.65178	7.5807	7.78748	5.76728	5.69507	5.7407	-3.83432	-1.93897	3.83432	down	1.57612e-11	2.2828e-10
54541	DDIT4	DNA damage inducible transcript 4	9.88381	9.93089	9.8434	8.62741	8.64085	8.64954	-2.37309	-1.24677	2.37309	down	2.16106e-12	5.1011e-11
4143	MAT1A	methionine adenosyltransferase I, alpha	8.30163	8.21008	8.26019	6.5921	6.95029	6.84128	-2.75632	-1.46274	2.75632	down	1.22799e-09	7.64885e-09
7145	TNS1	tensin 1	7.04067	6.9873	7.13901	5.75781	5.75902	5.69956	-2.49124	-1.31686	2.49124	down	1.23615e-09	7.68822e-09
55732	C1orf112	chromosome 1 open reading frame 112	7.69278	7.55206	7.56662	5.29533	5.63952	5.6847	-4.18135	-2.06397	4.18135	down	2.47023e-10	2.02707e-09
9823	ARMCX2	armadillo repeat containing, X-linked 2	9.07602	8.98096	8.97484	6.36014	6.3352	6.45241	-6.18178	-2.62802	6.18178	down	2.89445e-14	2.7059e-12
1891	ECH1	enoyl-CoA hydratase 1, peroxisomal	9.06467	9.05055	9.16961	7.59279	7.47147	7.4491	-3.01152	-1.59049	3.01152	down	5.781e-12	1.06239e-10
8543	LMO4	LIM domain only 4	5.38437	5.38552	5.70494	4.2863	4.43715	4.53425	-2.10289	-1.07238	2.10289	down	1.26255e-06	3.54227e-06
400410	ST20	suppressor of tumorigenicity 20	6.75533	6.34028	6.4887	5.00317	5.28485	5.81746	-2.23397	-1.15961	2.23397	down	3.1179e-05	6.92262e-05
26043	UBXN7	UBX domain protein 7	5.9272	5.87832	6.23227	7.26305	7.42465	7.36633	2.52931	1.33875	2.52931	up	1.56911e-08	6.86017e-08
994	CDC25B	cell division cycle 25B	8.48466	8.48981	8.69026	7.19422	7.27738	7.21848	-2.50513	-1.32488	2.50513	down	2.14467e-10	1.80347e-09
84962	AJUBA	ajuba LIM protein	7.2358	7.12461	7.24677	4.10805	4.37094	4.2916	-7.70359	-2.94553	7.70359	down	1.90115e-12	4.6374e-11
134728	IRAK1BP1	interleukin 1 receptor associated kinase 1 binding protein 1	6.30078	6.05706	6.42582	3.83272	3.90917	4.13613	-4.931	-2.30188	4.931	down	4.7289e-10	3.45404e-09
1031	CDKN2C	cyclin-dependent kinase inhibitor 2C (p18, inhibits CDK4)	8.53169	8.21632	8.24177	5.00993	4.09144	4.2448	-14.7353	-3.8812	14.7353	down	2.32617e-10	1.93363e-09
51315	KRCC1	lysine-rich coiled-coil 1	7.42145	7.3145	7.44858	6.15181	6.29607	6.50243	-2.11121	-1.07807	2.11121	down	7.73477e-08	2.80929e-07
1543	CYP1A1	cytochrome P450, family 1, subfamily A, polypeptide 1	6.9105	6.89031	6.9592	8.18809	8.19217	8.21181	2.42394	1.27735	2.42394	up	4.51705e-11	5.12671e-10
27063	ANKRD1	ankyrin repeat domain 1 (cardiac muscle)	7.46463	7.39111	7.53751	5.6872	5.31444	5.567	-3.84115	-1.94154	3.84115	down	2.83412e-10	2.27084e-09
2235	FECH	ferrochelatase	9.55286	9.59978	9.57309	8.34824	8.52696	8.46961	-2.184	-1.12697	2.184	down	8.25738e-11	8.29282e-10
4683	NBN	nibrin	8.17543	8.03499	8.10741	6.83302	6.91809	6.91265	-2.32628	-1.21802	2.32628	down	2.76704e-10	2.22724e-09
1362	CPD	carboxypeptidase D	9.23394	9.20329	9.15629	10.3084	10.3116	10.2883	2.15086	1.10491	2.15086	up	3.61008e-12	7.51177e-11
23198	PSME4	proteasome activator subunit 4	7.72664	7.88074	7.73598	8.76835	8.91616	8.90311	2.11612	1.08142	2.11612	up	9.16665e-10	6.00009e-09
29103	DNAJC15	DnaJ heat shock protein family (Hsp40) member C15	8.07538	8.05781	8.03719	6.84341	6.95382	6.94955	-2.20564	-1.1412	2.20564	down	3.43854e-10	2.66127e-09
10654	PMVK	phosphomevalonate kinase	8.53249	8.51996	8.5085	6.63214	6.70928	6.69204	-3.5863	-1.8425	3.5863	down	6.9645e-13	2.27172e-11
1282	COL4A1	collagen, type IV, alpha 1	8.95177	9.04528	9.01472	7.2582	7.20394	7.24129	-3.40923	-1.76945	3.40923	down	4.46536e-13	1.69411e-11
22900	CARD8	caspase recruitment domain family member 8	5.47017	5.58734	5.78931	4.43327	4.43327	4.81792	-2.07645	-1.05412	2.07645	down	3.75189e-06	9.65574e-06
93099	DMKN	dermokine	4.82663	5.1176	5.24131	3.97997	3.97208	4.20775	-2.01193	-1.00858	2.01193	down	5.03883e-06	1.26903e-05
10273	STUB1	STIP1 homology and U-box containing protein 1, E3 ubiquitin protein ligase	10.8586	10.8512	10.9524	9.60513	9.52622	9.48845	-2.54467	-1.34748	2.54467	down	1.80346e-12	4.48307e-11
25842	ASF1A	anti-silencing function 1A histone chaperone	8.64842	8.44889	8.5353	6.40248	6.02296	6.223	-5.02129	-2.32806	5.02129	down	1.8574e-11	2.58665e-10
10923	SUB1	SUB1 homolog, transcriptional regulator	8.10567	8.12494	8.08623	6.41631	6.75811	6.78923	-2.73409	-1.45106	2.73409	down	2.9361e-09	1.60042e-08
2014	EMP3	epithelial membrane protein 3	12.0165	11.9935	11.9947	10.9951	10.9448	10.971	-2.04384	-1.03128	2.04384	down	7.42443e-13	2.38002e-11
1437	CSF2	colony stimulating factor 2 (granulocyte-macrophage)	4.95535	5.15102	4.69233	6.84982	6.8345	6.74871	3.67593	1.87811	3.67593	up	1.93884e-09	1.12979e-08
440	ASNS	asparagine synthetase (glutamine-hydrolyzing)	11.2705	11.2781	11.255	10.1459	10.2776	10.2287	-2.07118	-1.05045	2.07118	down	8.66322e-12	1.44796e-10
10461	MERTK	MER proto-oncogene, tyrosine kinase	3.55478	3.76738	3.29071	5.62482	5.715	5.44097	4.15824	2.05597	4.15824	up	4.49761e-09	2.30859e-08
3133	HLA-E	major histocompatibility complex, class I, E	8.48464	8.65027	8.68247	9.70518	9.59216	9.58245	2.02905	1.0208	2.02905	up	1.07623e-09	6.84057e-09
5737	PTGFR	prostaglandin F receptor (FP)	7.31424	7.07242	7.04799	5.21769	5.49746	5.53173	-3.31557	-1.72926	3.31557	down	2.44539e-09	1.37474e-08
84248	FYTTD1	forty-two-three domain containing 1	8.12834	8.10303	8.13897	9.0417	9.24593	9.16483	2.03831	1.02737	2.03831	up	5.83612e-10	4.11806e-09
9728	SECISBP2L	SECIS binding protein 2-like	5.27152	5.44692	5.23146	5.99477	6.89842	6.95698	2.46244	1.30009	2.46244	up	4.08868e-05	8.92539e-05
128866	CHMP4B	charged multivesicular body protein 4B	8.39851	8.22905	8.39305	9.54636	9.56976	9.63361	2.36697	1.24304	2.36697	up	5.19974e-11	5.7366e-10
3227	HOXC11	homeobox C11	6.4966	6.47879	6.62139	5.30965	5.43456	5.52684	-2.15633	-1.10858	2.15633	down	4.8637e-08	1.86132e-07
130507	UBR3	ubiquitin protein ligase E3 component n-recognin 3 (putative)	6.50285	6.42114	6.36381	8.15943	8.48799	8.55092	3.91817	1.97018	3.91817	up	1.48463e-10	1.33153e-09
3983	ABLIM1	actin binding LIM protein 1	8.65584	8.69832	8.86203	7.24548	7.05679	7.07569	-3.05833	-1.61274	3.05833	down	6.12918e-11	6.53199e-10
57722	IGDCC4	immunoglobulin superfamily, DCC subclass, member 4	4.56418	4.54847	4.28417	5.69937	5.90141	5.79025	2.51647	1.3314	2.51647	up	5.57704e-08	2.10146e-07
56907	SPIRE1	spire-type actin nucleation factor 1	6.50751	6.50714	6.65109	8.23978	8.43045	8.40991	3.49381	1.8048	3.49381	up	1.77621e-11	2.50394e-10
8427	ZNF282	zinc finger protein 282	5.42663	5.4672	5.71247	7.29104	7.13118	7.05268	3.07986	1.62287	3.07986	up	2.06165e-09	1.19124e-08
7533	YWHAH	tyrosine 3-monooxygenase/tryptophan 5-monooxygenase activation protein, eta	11.7544	11.7882	11.7896	10.0866	9.97888	10.0114	-3.36768	-1.75175	3.36768	down	1.33862e-14	1.73387e-12
10284	SAP18	Sin3A associated protein 18kDa	8.1136	8.10263	8.24207	9.47344	9.59041	9.55	2.61205	1.38518	2.61205	up	1.15269e-11	1.80826e-10
89894	TMEM116	transmembrane protein 116	6.49811	6.5103	6.54023	5.11751	5.2019	5.28992	-2.48475	-1.3131	2.48475	down	3.97562e-09	2.07666e-08
10791	VAMP5	vesicle associated membrane protein 5	7.84344	7.95811	8.00566	6.17862	6.26124	6.18861	-3.30866	-1.72625	3.30866	down	1.77695e-11	2.50407e-10
79230	ZNF557	zinc finger protein 557	5.11555	4.70551	4.78294	5.84804	6.1154	6.11968	2.23412	1.15971	2.23412	up	9.92048e-07	2.84127e-06
752	FMNL1	formin like 1	6.07446	6.07909	6.40013	7.47267	7.46492	7.58314	2.50073	1.32235	2.50073	up	1.0909e-08	4.98994e-08
85359	DGCR6L	DiGeorge syndrome critical region gene 6-like	8.64903	8.89446	8.96757	7.89851	7.51061	7.55077	-2.27162	-1.18372	2.27162	down	1.16571e-07	4.04373e-07
387755	INSC	inscuteable homolog (Drosophila)	5.46511	5.26239	5.73972	3.94454	4.0598	4.05391	-2.76956	-1.46966	2.76956	down	8.72973e-08	3.12793e-07
54778	RNF111	ring finger protein 111	6.55977	6.45165	6.41229	7.74312	7.99217	8.01327	2.71625	1.44162	2.71625	up	1.06949e-09	6.80545e-09
54069	MIS18A	MIS18 kinetochore protein A	8.62024	8.65333	8.73566	7.56559	7.66707	7.68546	-2.04255	-1.03037	2.04255	down	5.67434e-10	4.02425e-09
4524	MTHFR	methylenetetrahydrofolate reductase (NAD(P)H)	5.40052	5.77099	5.36157	7.24097	7.35892	7.32662	3.47692	1.79781	3.47692	up	1.68535e-09	1.00058e-08
28981	IFT81	intraflagellar transport 81	6.91295	6.95272	6.93507	5.73181	5.77088	5.68962	-2.30188	-1.20281	2.30188	down	2.1518e-09	1.23528e-08
79073	TMEM109	transmembrane protein 109	9.93938	9.96464	9.98492	8.71631	8.78878	8.75065	-2.31509	-1.21107	2.31509	down	2.38818e-12	5.47669e-11
5629	PROX1	prospero homeobox 1	4.26698	4.63626	4.27467	6.0186	6.48277	6.41215	3.76297	1.91187	3.76297	up	1.85578e-08	7.95591e-08
100008586	GAGE12F	G antigen 12F	3.70658	3.58294	3.72375	4.8089	5.24947	5.21758	2.67751	1.42089	2.67751	up	1.83979e-07	6.09576e-07
8226	PUDP	pseudouridine 5'-phosphatase	9.76393	9.76861	9.79695	8.38774	8.53307	8.55849	-2.43411	-1.2834	2.43411	down	1.62865e-11	2.33724e-10
222236	NAPEPLD	N-acyl phosphatidylethanolamine phospholipase D	4.90503	4.90738	5.00709	3.71868	3.69634	3.87101	-2.26235	-1.17782	2.26235	down	1.1241e-07	3.91891e-07
6885	MAP3K7	mitogen-activated protein kinase kinase kinase 7	9.36338	9.43311	9.44253	10.4971	10.3867	10.5045	2.07018	1.04976	2.07018	up	3.23028e-11	3.95085e-10
54360	CYTL1	cytokine like 1	7.34804	7.48107	7.36266	5.36622	5.33247	5.6271	-3.87804	-1.95533	3.87804	down	1.3732e-10	1.24763e-09
55612	FERMT1	fermitin family member 1	5.97773	5.96485	5.87973	4.39998	3.73495	3.9652	-3.75131	-1.90739	3.75131	down	3.09733e-08	1.25178e-07
101928143	LOC101928143	uncharacterized LOC101928143	6.62511	6.51932	6.79773	8.53069	8.35612	8.36993	3.41415	1.77153	3.41415	up	7.43559e-11	7.61227e-10
6594	SMARCA1	SWI/SNF related, matrix associated, actin dependent regulator of chromatin, subfamily a, member 1	5.60176	5.47019	5.6885	4.40832	4.50539	4.59149	-2.1215	-1.08508	2.1215	down	2.3369e-07	7.5922e-07
79809	TTC21B	tetratricopeptide repeat domain 21B	7.65031	7.4615	7.71616	9.01755	9.13566	9.04278	2.74348	1.45601	2.74348	up	1.0309e-10	9.91256e-10
2177	FANCD2	Fanconi anemia complementation group D2	6.62771	6.2352	6.4766	3.88685	4.42294	4.20285	-4.84207	-2.27562	4.84207	down	3.27415e-09	1.7582e-08
10370	CITED2	Cbp/p300-interacting transactivator, with Glu/Asp rich carboxy-terminal domain, 2	10.7038	10.6962	10.6517	8.51712	8.53113	8.59174	-4.39922	-2.13725	4.39922	down	3.16148e-15	7.1411e-13
55268	ECHDC2	enoyl-CoA hydratase domain containing 2	4.86128	4.88073	4.94548	3.88943	3.60832	3.69913	-2.24006	-1.16354	2.24006	down	2.31496e-07	7.52717e-07
54726	OTUD4	OTU deubiquitinase 4	5.80229	5.86155	5.9989	7.34295	7.41625	7.32219	2.77576	1.47288	2.77576	up	4.1723e-10	3.11432e-09
29796	UQCR10	ubiquinol-cytochrome c reductase, complex III subunit X	12.5034	12.5008	12.5364	11.4449	11.4804	11.4401	-2.08258	-1.05837	2.08258	down	4.03251e-13	1.5837e-11
122830	NAA30	N(alpha)-acetyltransferase 30, NatC catalytic subunit	6.83562	6.88599	6.88031	8.28346	8.47645	8.43678	2.89104	1.53159	2.89104	up	3.15885e-11	3.88415e-10
221937	FOXK1	forkhead box K1	4.64365	5.19014	4.69137	6.20493	6.27802	6.20819	2.61835	1.38866	2.61835	up	3.19612e-07	1.00844e-06
7626	ZNF75D	zinc finger protein 75D	6.5724	6.64698	6.71042	7.72659	7.74862	7.73905	2.13586	1.09482	2.13586	up	1.20454e-09	7.52034e-09
64376	IKZF5	IKAROS family zinc finger 5	6.5007	6.17764	6.32566	8.3716	8.40247	8.35528	4.11754	2.04178	4.11754	up	1.45733e-11	2.15387e-10
100630923	LOC100630923	LOC100289561-PRKRIP1 readthrough	8.00997	8.02358	7.99484	9.37962	9.48331	9.45289	2.69287	1.42914	2.69287	up	1.58944e-12	4.09429e-11
4722	NDUFS3	NADH:ubiquinone oxidoreductase core subunit S3	9.21035	9.1557	9.26262	8.15111	8.11981	8.15781	-2.09456	-1.06665	2.09456	down	5.08434e-11	5.63633e-10
91624	NEXN	nexilin (F actin binding protein)	5.08025	5.03146	4.95161	3.17688	3.45868	3.80773	-2.90797	-1.54001	2.90797	down	2.86079e-07	9.12953e-07
10962	MLLT11	myeloid/lymphoid or mixed-lineage leukemia; translocated to, 11	11.1623	11.1262	11.1311	10.0914	10.1155	10.1235	-2.04167	-1.02975	2.04167	down	1.57917e-12	4.07591e-11
5876	RABGGTB	Rab geranylgeranyltransferase, beta subunit	9.77416	9.86151	9.57619	10.6691	10.8539	10.8503	2.076	1.0538	2.076	up	6.05841e-09	2.99449e-08
7039	TGFA	transforming growth factor alpha	6.06336	6.19485	6.05264	7.09385	7.14913	7.17715	2.05114	1.03643	2.05114	up	1.20861e-08	5.45413e-08
6491	STIL	SCL/TAL1 interrupting locus	8.85363	8.98394	8.85529	7.11677	7.33508	7.3817	-3.07326	-1.61977	3.07326	down	7.16852e-11	7.40482e-10
4628	MYH10	myosin, heavy chain 10, non-muscle	8.63996	8.5115	8.7463	6.68667	6.65966	6.58674	-3.9675	-1.98823	3.9675	down	3.70433e-12	7.6332e-11
80323	CCDC68	coiled-coil domain containing 68	5.62823	5.75427	5.43628	4.08597	4.81015	4.42921	-2.24153	-1.16448	2.24153	down	1.3392e-05	3.13121e-05
23215	PRRC2C	proline-rich coiled-coil 2C	7.94993	7.77032	7.92702	8.94769	9.04861	9.0373	2.18673	1.12878	2.18673	up	3.64862e-10	2.78962e-09
7923	HSD17B8	hydroxysteroid (17-beta) dehydrogenase 8	6.17407	6.25326	6.29181	4.58109	4.54291	4.85766	-2.98796	-1.57916	2.98796	down	5.75856e-09	2.86221e-08
92070	CTBP1-AS2	CTBP1 antisense RNA 2 (head to head)	7.07031	6.92805	6.80651	5.52735	5.5817	5.75077	-2.48805	-1.31502	2.48805	down	1.3316e-08	5.93124e-08
1540	CYLD	cylindromatosis (turban tumor syndrome)	8.85957	8.94686	8.90464	10.4642	10.4266	10.4618	2.92247	1.54719	2.92247	up	1.16112e-13	6.66273e-12
100528031	FKBP1A-SDCBP2	FKBP1A-SDCBP2 readthrough (NMD candidate)	5.68753	5.71705	5.41243	6.84048	7.0195	7.02903	2.56211	1.35733	2.56211	up	1.6767e-08	7.28087e-08
9318	COPS2	COP9 signalosome subunit 2	9.41796	9.45833	9.4899	10.9438	11.028	11.0664	2.94308	1.55733	2.94308	up	1.9582e-13	9.51726e-12
84279	PRADC1	protease-associated domain containing 1	8.64709	8.64705	8.66565	7.1201	7.10796	7.14477	-2.88583	-1.52899	2.88583	down	2.02044e-12	4.84075e-11
7498	XDH	xanthine dehydrogenase	6.14813	6.12771	5.99099	7.98284	8.03595	7.87505	3.66972	1.87567	3.66972	up	1.49478e-11	2.19032e-10
57415	C3orf14	chromosome 3 open reading frame 14	10.5516	10.4662	10.4501	9.34163	9.43504	9.35585	-2.16114	-1.11179	2.16114	down	1.31718e-11	2.00044e-10
164	AP1G1	adaptor-related protein complex 1 gamma 1 subunit	6.72596	6.66292	6.58444	7.95713	7.81211	7.81841	2.30502	1.20478	2.30502	up	1.0203e-09	6.55437e-09
57214	CEMIP	cell migration inducing protein, hyaluronan binding	8.13551	8.19545	8.13773	9.88497	9.92583	9.89445	3.35316	1.74552	3.35316	up	5.78302e-14	4.22969e-12
2310	FOXO3B	forkhead box O3B pseudogene	7.2904	7.38381	7.58896	8.73187	8.59452	8.56503	2.31244	1.20942	2.31244	up	3.84754e-09	2.0184e-08
11130	ZWINT	ZW10 interacting kinetochore protein	9.69697	9.6525	9.78753	6.46282	6.3008	6.30259	-10.2456	-3.35693	10.2456	down	3.13513e-15	7.12277e-13
147372	CCBE1	collagen and calcium binding EGF domains 1	10.1578	10.2033	10.1088	9.05755	9.09874	9.07397	-2.1139	-1.07991	2.1139	down	8.58614e-12	1.43877e-10
353088	ZNF429	zinc finger protein 429	6.46772	6.42405	6.40011	4.83618	5.08737	4.78145	-2.88578	-1.52896	2.88578	down	4.60717e-09	2.35678e-08
6342	SCP2	sterol carrier protein 2	10.0322	10.052	10.0639	8.9988	9.00563	8.99263	-2.07102	-1.05034	2.07102	down	4.61235e-12	9.00283e-11
375248	ANKRD36	ankyrin repeat domain 36	5.75355	5.67154	5.48181	4.91032	4.38251	4.43507	-2.08445	-1.05967	2.08445	down	8.73324e-06	2.11404e-05
9205	ZMYM5	zinc finger, MYM-type 5	4.51466	4.5696	4.79633	5.98679	5.99055	6.18367	2.68851	1.42681	2.68851	up	2.17176e-08	9.13815e-08
8988	HSPB3	heat shock protein family B (small) member 3	5.07522	4.87238	5.12833	4.1648	3.60357	3.65613	-2.32486	-1.21714	2.32486	down	3.95155e-06	1.01229e-05
2633	GBP1	guanylate binding protein 1, interferon-inducible	7.62811	7.61955	7.57561	4.27319	4.22243	4.35507	-10.0157	-3.32419	10.0157	down	7.40272e-14	4.99481e-12
7818	DAP3	death associated protein 3	9.92681	9.97643	10.0409	11.3167	11.2564	11.2536	2.45237	1.29418	2.45237	up	8.72697e-13	2.66669e-11
7187	TRAF3	TNF receptor associated factor 3	7.43983	7.30471	7.46252	8.59027	8.67604	8.62835	2.34437	1.2292	2.34437	up	1.33137e-10	1.21698e-09
10617	STAMBP	STAM binding protein	8.26648	8.1602	8.16458	6.97168	6.96851	6.99505	-2.32733	-1.21867	2.32733	down	1.19257e-10	1.11355e-09
23185	LARP4B	La ribonucleoprotein domain family member 4B	7.04732	6.8774	7.20719	8.67708	8.56409	8.57206	2.94944	1.56044	2.94944	up	2.74446e-10	2.2132e-09
84057	MND1	meiotic nuclear divisions 1	9.02688	8.89108	8.8454	7.18905	7.192	7.20719	-3.30589	-1.72504	3.30589	down	2.63227e-12	5.92519e-11
148327	CREB3L4	cAMP responsive element binding protein 3-like 4	6.42735	6.33984	6.57746	5.21818	5.39538	5.40854	-2.15474	-1.10752	2.15474	down	9.88511e-08	3.49196e-07
23025	UNC13A	unc-13 homolog A (C. elegans)	4.2077	3.75646	4.19229	5.27485	5.40586	5.21037	2.36998	1.24488	2.36998	up	8.78182e-07	2.53578e-06
55692	LUC7L	LUC7-like	7.01784	6.97271	7.10176	8.10215	8.12245	8.18573	2.15249	1.10601	2.15249	up	5.64589e-10	4.00917e-09
56155	TEX14	testis expressed 14	4.25851	4.66015	4.60815	6.37876	6.01138	6.06761	3.12455	1.64365	3.12455	up	4.82727e-08	1.84864e-07
25820	ARIH1	ariadne RBR E3 ubiquitin protein ligase 1	8.19503	7.96598	8.19843	10.1569	10.1473	10.1874	4.12403	2.04405	4.12403	up	6.44798e-13	2.15911e-11
100137047	JMJD7	jumonji domain containing 7	5.8342	5.7981	5.97895	4.93288	4.7919	4.81954	-2.03117	-1.02231	2.03117	down	2.14444e-07	7.02064e-07
1902	LPAR1	lysophosphatidic acid receptor 1	7.25272	7.38035	7.4816	5.27471	5.05114	5.27471	-4.50451	-2.17137	4.50451	down	4.56217e-11	5.16818e-10
23351	KHNYN	KH and NYN domain containing	7.55069	7.39572	7.77778	9.06752	9.09281	8.99033	2.78078	1.47549	2.78078	up	8.13388e-10	5.43165e-09
9928	KIF14	kinesin family member 14	7.6029	7.58433	7.59011	6.00136	6.00447	6.18433	-2.88598	-1.52906	2.88598	down	1.5258e-10	1.36127e-09
79571	GCC1	GRIP and coiled-coil domain containing 1	8.78169	8.66759	8.70917	10.5019	10.5772	10.5651	3.55186	1.82857	3.55186	up	5.13589e-14	3.897e-12
5699	PSMB10	proteasome subunit beta 10	9.4041	9.47466	9.62168	8.22661	8.27026	8.086	-2.4723	-1.30586	2.4723	down	2.29993e-10	1.91548e-09
113130	CDCA5	cell division cycle associated 5	9.77988	9.69836	9.79754	7.58276	7.61892	7.56485	-4.49945	-2.16975	4.49945	down	1.74232e-14	2.0084e-12
55291	PPP6R3	protein phosphatase 6, regulatory subunit 3	7.27269	7.37873	7.52081	8.49819	8.46517	8.53558	2.15682	1.1089	2.15682	up	1.72891e-09	1.02333e-08
10535	RNASEH2A	ribonuclease H2 subunit A	10.197	10.2524	10.3586	7.21592	7.1534	7.31352	-8.23478	-3.04173	8.23478	down	3.77045e-15	7.99079e-13
285440	CYP4V2	cytochrome P450, family 4, subfamily V, polypeptide 2	6.3978	6.40013	6.22258	4.30588	4.23924	4.10163	-4.36078	-2.12459	4.36078	down	1.21681e-10	1.13186e-09
9619	ABCG1	ATP binding cassette subfamily G member 1	4.89088	4.53983	4.89966	7.26305	7.53736	7.46181	6.25041	2.64395	6.25041	up	4.65892e-11	5.24659e-10
10609	P3H4	prolyl 3-hydroxylase family member 4 (non-enzymatic)	7.6985	7.77237	7.9841	6.30714	6.2307	6.29876	-2.90685	-1.53946	2.90685	down	3.98721e-10	2.99977e-09
729080	LOC729080	glycine cleavage system protein H (aminomethyl carrier) pseudogene	11.6896	11.7516	11.6584	10.4623	10.5058	10.6117	-2.2552	-1.17326	2.2552	down	8.17946e-12	1.38307e-10
59348	ZNF350	zinc finger protein 350	6.37266	6.20082	6.32431	7.51058	7.55164	7.66275	2.42121	1.27573	2.42121	up	1.33962e-09	8.23606e-09
10410	IFITM3	interferon induced transmembrane protein 3	10.4679	10.4274	10.47	9.22585	9.20488	9.19714	-2.37147	-1.24578	2.37147	down	5.32229e-13	1.89762e-11
79077	DCTPP1	dCTP pyrophosphatase 1	10.1202	10.1431	10.264	8.62731	8.78355	8.73185	-2.75405	-1.46155	2.75405	down	6.68942e-12	1.18544e-10
51005	AMDHD2	amidohydrolase domain containing 2	8.1849	8.26082	8.325	6.83197	6.56709	6.56336	-3.03725	-1.60277	3.03725	down	2.38461e-10	1.96836e-09
29089	UBE2T	ubiquitin conjugating enzyme E2T	11.0759	11.0096	11.0631	8.83742	8.81133	8.79447	-4.70801	-2.23512	4.70801	down	9.22263e-16	3.62714e-13
404785	POTEG	POTE ankyrin domain family member G	7.22015	7.38066	7.05505	5.9352	6.14852	6.27333	-2.14296	-1.0996	2.14296	down	2.80182e-07	8.95305e-07
8908	GYG2	glycogenin 2	6.28337	6.33508	6.33155	4.76059	4.76167	4.82331	-2.8975	-1.53481	2.8975	down	7.10363e-10	4.83628e-09
214	ALCAM	activated leukocyte cell adhesion molecule	9.75529	9.74092	9.508	7.53931	7.65483	7.70155	-4.10156	-2.03617	4.10156	down	3.5404e-12	7.39829e-11
8738	CRADD	CASP2 and RIPK1 domain containing adaptor with death domain	7.97822	8.05458	8.0788	6.76302	6.87308	7.00908	-2.22757	-1.15547	2.22757	down	2.64283e-09	1.46508e-08
55132	LARP1B	La ribonucleoprotein domain family member 1B	6.63734	6.57231	6.65251	8.37393	8.50664	8.5537	3.62347	1.85737	3.62347	up	3.74176e-12	7.68754e-11
51374	ATRAID	all-trans retinoic acid induced differentiation factor	10.5046	10.5466	10.5367	8.73505	8.85526	8.786	-3.33397	-1.73724	3.33397	down	6.52151e-14	4.64191e-12
408186	OVOS	ovostatin	7.55157	7.37347	7.38286	5.27528	5.31974	5.34559	-4.35427	-2.12243	4.35427	down	9.68981e-12	1.5777e-10
57181	SLC39A10	solute carrier family 39 (zinc transporter), member 10	5.5519	5.84399	5.58733	4.57079	4.72393	4.59726	-2.04261	-1.03041	2.04261	down	7.04749e-07	2.07188e-06
8479	HIRIP3	HIRA interacting protein 3	8.97806	8.99403	9.14952	7.27696	7.20638	7.22421	-3.49353	-1.80469	3.49353	down	1.80002e-12	4.47737e-11
84912	SLC35B4	solute carrier family 35 (UDP-xylose/UDP-N-acetylglucosamine transporter), member B4	7.33489	7.4052	7.45801	5.99659	5.94156	6.01641	-2.6657	-1.41451	2.6657	down	2.33772e-10	1.93992e-09
79685	SAP30L	SAP30-like	7.73653	7.7341	7.76381	9.54381	9.47425	9.56205	3.43876	1.78189	3.43876	up	1.2314e-13	6.98397e-12
93663	ARHGAP18	Rho GTPase activating protein 18	9.91254	9.89174	9.838	7.62158	7.51272	7.64783	-4.87944	-2.28672	4.87944	down	2.09184e-14	2.26434e-12
23169	SLC35D1	solute carrier family 35 (UDP-GlcA/UDP-GalNAc transporter), member D1	7.83874	7.83589	7.8672	6.72641	6.67832	6.74376	-2.19028	-1.13111	2.19028	down	3.62767e-10	2.7774e-09
10581	IFITM2	interferon induced transmembrane protein 2	10.6996	10.685	10.7202	9.2036	9.13126	9.20521	-2.87107	-1.52159	2.87107	down	8.94249e-14	5.59732e-12
79885	HDAC11	histone deacetylase 11	6.19522	6.21255	6.31897	7.38999	7.42979	7.3418	2.21138	1.14495	2.21138	up	2.16707e-09	1.24314e-08
3673	ITGA2	integrin, alpha 2 (CD49B, alpha 2 subunit of VLA-2 receptor)	7.36689	7.36137	7.40455	9.60501	9.61061	9.61747	4.7025	2.23343	4.7025	up	6.70152e-15	1.12393e-12
6241	RRM2	ribonucleotide reductase M2	11.1371	11.1618	11.134	7.68146	7.62157	7.64005	-11.2871	-3.4966	11.2871	down	9.16112e-18	2.98324e-14
9474	ATG5	autophagy related 5	7.51927	7.41422	7.63131	5.58455	6.05749	5.93509	-3.16577	-1.66256	3.16577	down	7.71609e-09	3.70056e-08
142940	TRUB1	TruB pseudouridine (psi) synthase family member 1	8.62274	8.54319	8.3872	6.68208	6.92887	6.97064	-3.15399	-1.65718	3.15399	down	3.36146e-10	2.61665e-09
9581	PREPL	prolyl endopeptidase-like	7.12914	6.953	7.18831	5.7244	5.74347	5.52617	-2.68602	-1.42547	2.68602	down	4.25747e-09	2.20357e-08
10892	MALT1	MALT1 paracaspase	8.24294	8.30312	8.23596	9.31071	9.4066	9.43707	2.17969	1.12412	2.17969	up	4.61631e-11	5.20946e-10
220213	OTUD1	OTU deubiquitinase 1	7.76063	7.67399	7.71484	8.87385	8.89804	8.99293	2.30556	1.20512	2.30556	up	4.83093e-11	5.39058e-10
8848	TSC22D1	TSC22 domain family member 1	8.1441	8.14178	8.24604	9.28775	9.24571	9.25763	2.12342	1.08639	2.12342	up	4.8221e-11	5.3838e-10
51141	INSIG2	insulin induced gene 2	6.96052	6.91793	6.87055	5.79673	5.91631	5.96102	-2.03493	-1.02498	2.03493	down	2.42551e-08	1.00832e-07
4712	NDUFB6	NADH:ubiquinone oxidoreductase subunit B6	10.7727	10.7035	10.5978	9.12038	9.37226	9.45958	-2.59173	-1.37391	2.59173	down	7.45673e-10	5.04042e-09
3077	HFE	hemochromatosis	6.26101	6.33799	6.45253	5.30498	5.12129	4.86105	-2.38624	-1.25474	2.38624	down	2.05835e-07	6.76316e-07
114915	EPB41L4A-AS1	EPB41L4A antisense RNA 1	9.25609	9.36372	9.501	11.1194	11.0477	11.0562	3.25089	1.70083	3.25089	up	1.94197e-12	4.70467e-11
55269	PSPC1	paraspeckle component 1	8.8479	8.70622	8.80635	6.6949	6.8681	6.99849	-3.81847	-1.93299	3.81847	down	1.84522e-11	2.57428e-10
79663	HSPBAP1	HSPB (heat shock 27kDa) associated protein 1	6.25401	6.13174	6.33852	7.76254	7.75724	7.65793	2.79816	1.48448	2.79816	up	2.32986e-10	1.93504e-09
90673	PPP1R3E	protein phosphatase 1 regulatory subunit 3E	7.41053	7.29998	7.44407	4.81946	5.20809	4.91168	-5.29678	-2.40512	5.29678	down	5.27379e-11	5.80192e-10
701	BUB1B	BUB1B, mitotic checkpoint serine/threonine kinase	9.31875	9.31085	9.29441	6.74511	6.75067	6.86738	-5.73695	-2.52028	5.73695	down	1.45774e-14	1.82578e-12
81931	ZNF93	zinc finger protein 93	8.37991	8.43409	8.42851	6.83634	6.82807	6.85058	-2.98109	-1.57584	2.98109	down	3.22486e-12	6.87871e-11
90736	FAM104B	family with sequence similarity 104 member B	9.04822	8.9993	9.16461	6.96697	7.02701	7.07077	-4.13855	-2.04913	4.13855	down	4.55499e-13	1.71149e-11
55186	SLC25A36	solute carrier family 25 (pyrimidine nucleotide carrier), member 36	8.0685	8.12176	8.05952	9.36661	9.42323	9.40062	2.48554	1.31356	2.48554	up	2.78773e-12	6.17202e-11
58538	MPP4	membrane protein, palmitoylated 4	9.0208	8.94204	9.08375	7.03515	7.22741	7.22941	-3.60885	-1.85154	3.60885	down	5.0625e-12	9.66425e-11
9869	SETDB1	SET domain, bifurcated 1	5.70935	5.46468	5.61253	6.62359	6.72156	6.62359	2.08598	1.06073	2.08598	up	6.43266e-08	2.38395e-07
85236	HIST1H2BK	histone cluster 1, H2bk	10.1781	10.0889	10.0678	8.03675	7.99948	8.16742	-4.123	-2.04369	4.123	down	1.57363e-13	8.1373e-12
51105	PHF20L1	PHD finger protein 20-like 1	5.71131	5.69955	5.68969	7.02592	7.25076	7.15379	2.71943	1.44331	2.71943	up	7.90559e-10	5.29891e-09
80176	SPSB1	splA/ryanodine receptor domain and SOCS box containing 1	5.84361	5.95346	5.6441	7.52658	7.44784	7.62548	3.2934	1.71958	3.2934	up	4.44285e-10	3.28253e-09
6443	SGCB	sarcoglycan beta	8.5853	8.49642	8.49005	7.35482	7.47249	7.56605	-2.08417	-1.05947	2.08417	down	1.7496e-09	1.0337e-08
79754	ASB13	ankyrin repeat and SOCS box containing 13	7.3438	7.19138	7.0342	6.08963	6.08419	5.99895	-2.19193	-1.1322	2.19193	down	2.90975e-08	1.18467e-07
80313	LRRC27	leucine rich repeat containing 27	4.91114	4.75801	4.88504	3.84208	3.75078	3.87794	-2.03891	-1.0278	2.03891	down	4.39079e-07	1.34393e-06
219790	RTKN2	rhotekin 2	6.55085	6.60883	6.49881	3.92436	4.13769	4.05027	-5.71752	-2.51539	5.71752	down	1.1107e-11	1.7572e-10
11021	RAB35	RAB35, member RAS oncogene family	7.65884	7.54328	7.5523	9.00921	9.0047	8.99794	2.67427	1.41914	2.67427	up	5.1884e-12	9.84239e-11
66008	TRAK2	trafficking protein, kinesin binding 2	6.32063	6.44152	6.16802	7.27671	7.40935	7.53518	2.13913	1.09702	2.13913	up	6.11123e-08	2.27805e-07
64087	MCCC2	methylcrotonoyl-CoA carboxylase 2	9.8162	9.77433	9.83244	8.80413	8.79355	8.76576	-2.0277	-1.01984	2.0277	down	1.46324e-11	2.15878e-10
5289	PIK3C3	phosphatidylinositol 3-kinase catalytic subunit type 3	9.22066	9.2535	9.31761	10.2673	10.2577	10.2751	2.00387	1.00279	2.00387	up	1.53592e-11	2.23785e-10
54498	SMOX	spermine oxidase	6.5306	6.55714	6.74158	10.0759	10.0153	9.96082	10.6115	3.40756	10.6115	up	3.11687e-15	7.12268e-13
64783	RBM15	RNA binding motif protein 15	7.90132	8.02108	8.03123	9.16137	9.17037	9.27092	2.32357	1.21634	2.32357	up	5.96558e-11	6.39553e-10
3399	ID3	inhibitor of DNA binding 3, dominant negative helix-loop-helix protein	10.599	10.5812	10.573	8.60782	8.75585	8.84287	-3.60219	-1.84887	3.60219	down	6.24885e-13	2.11636e-11
828	CAPS	calcyphosine	5.9686	6.07048	6.05353	4.80895	4.71433	4.64997	-2.47333	-1.30645	2.47333	down	1.01013e-08	4.67022e-08
80097	MZT2B	mitotic spindle organizing protein 2B	8.70021	8.66524	8.72663	7.1271	7.2754	7.34615	-2.72794	-1.44781	2.72794	down	4.97234e-11	5.53258e-10
1959	EGR2	early growth response 2	3.81051	3.96544	3.81701	6.47883	6.48555	6.22476	5.78397	2.53206	5.78397	up	3.38368e-11	4.09851e-10
95681	CEP41	centrosomal protein 41kDa	8.10299	8.0357	8.25581	7.19489	6.99116	7.06678	-2.06655	-1.04722	2.06655	down	1.21566e-08	5.4823e-08
3149	HMGB3	high mobility group box 3	9.95095	9.93583	9.90837	8.20147	8.33357	8.42721	-3.05456	-1.61097	3.05456	down	3.69241e-12	7.633e-11
2157	F8	coagulation factor VIII, procoagulant component	6.18604	6.18604	6.14535	5.07296	4.78998	4.89791	-2.38203	-1.25219	2.38203	down	2.98677e-08	1.21133e-07
2593	GAMT	guanidinoacetate N-methyltransferase	8.80002	8.77316	8.74688	7.22863	7.28313	7.30603	-2.82991	-1.50076	2.82991	down	2.93878e-12	6.42634e-11
23336	SYNM	synemin	8.369	8.30956	8.26076	6.80428	6.83806	6.87367	-2.77875	-1.47444	2.77875	down	1.52597e-11	2.22833e-10
6632	SNRPD1	small nuclear ribonucleoprotein D1 polypeptide	9.61001	9.68382	9.64461	8.50421	8.49744	8.42199	-2.25261	-1.1716	2.25261	down	1.00384e-11	1.61828e-10
79786	KLHL36	kelch like family member 36	6.28914	6.36498	6.29036	8.18063	8.16006	8.0893	3.55168	1.8285	3.55168	up	3.04046e-12	6.59268e-11
124491	TMEM170A	transmembrane protein 170A	6.1245	6.13822	6.15828	7.64699	7.82582	7.83453	3.09251	1.62878	3.09251	up	6.13338e-11	6.53246e-10
92579	G6PC3	glucose 6 phosphatase, catalytic, 3	8.746	8.746	8.75734	7.40269	7.38486	7.31538	-2.60654	-1.38214	2.60654	down	6.69453e-12	1.18544e-10
100996720	LOC100996720	uncharacterized LOC100996720	6.78241	6.80038	6.87402	5.71415	5.67473	5.76484	-2.14508	-1.10103	2.14508	down	8.64932e-09	4.08249e-08
9399	STOML1	stomatin like 1	6.29137	6.15891	6.27758	4.67452	4.82766	4.91613	-2.70667	-1.43652	2.70667	down	6.54923e-09	3.2119e-08
580	BARD1	BRCA1 associated RING domain 1	8.0479	8.00161	8.11987	5.90079	5.85541	5.88309	-4.52117	-2.1767	4.52117	down	7.75472e-13	2.45568e-11
2191	FAP	fibroblast activation protein alpha	5.76837	5.5714	5.7653	4.71516	4.35581	4.62256	-2.19951	-1.13718	2.19951	down	5.502e-07	1.65246e-06
167227	DCP2	decapping mRNA 2	5.0037	5.04382	5.26528	6.13925	6.18374	6.38036	2.18887	1.13018	2.18887	up	2.02883e-07	6.67175e-07
5557	PRIM1	primase, DNA, polypeptide 1 (49kDa)	9.61808	9.55757	9.56902	6.67706	6.73295	6.7066	-7.34122	-2.87602	7.34122	down	1.17589e-15	3.96646e-13
23089	PEG10	paternally expressed 10	8.19795	8.09397	8.06781	6.57501	6.49592	6.40483	-3.09082	-1.62799	3.09082	down	3.31773e-11	4.03132e-10
3329	HSPD1	heat shock protein family D (Hsp60) member 1	4.12188	4.38801	4.42969	6.86268	6.98299	6.97531	6.17797	2.62713	6.17797	up	1.53534e-11	2.23785e-10
10608	MXD4	MAX dimerization protein 4	7.26757	7.50963	7.63823	9.02747	8.8418	8.83345	2.69278	1.4291	2.69278	up	2.5306e-09	1.4137e-08
84617	TUBB6	tubulin, beta 6 class V	12.1311	12.0314	12.0574	10.7694	10.6798	10.6386	-2.59802	-1.37741	2.59802	down	7.92448e-13	2.4973e-11
5361	PLXNA1	plexin A1	5.34576	5.28482	5.52365	6.46002	6.37344	6.38307	2.029	1.02077	2.029	up	1.3052e-07	4.47986e-07
133690	CAPSL	calcyphosine-like	5.30596	4.95053	5.44615	4.1674	3.52134	3.97354	-2.54345	-1.34679	2.54345	down	5.49425e-06	1.3756e-05
170506	DHX36	DEAH (Asp-Glu-Ala-His) box polypeptide 36	8.5567	8.57878	8.56665	9.68646	9.61573	9.60963	2.09928	1.0699	2.09928	up	1.5217e-11	2.22293e-10
3937	LCP2	lymphocyte cytosolic protein 2	6.20493	5.89184	6.0774	7.46742	7.49667	7.5671	2.73652	1.45234	2.73652	up	1.61237e-09	9.65767e-09
1716	DGUOK	deoxyguanosine kinase	10.6869	10.7112	10.6713	9.67623	9.70725	9.68363	-2.00108	-1.00078	2.00108	down	3.6899e-12	7.633e-11
54981	NMRK1	nicotinamide riboside kinase 1	6.33036	6.43051	6.68654	5.25714	5.14256	5.26171	-2.39828	-1.262	2.39828	down	5.74962e-08	2.16036e-07
100158262	SCARNA9L	small Cajal body-specific RNA 9-like	4.76067	4.61252	4.45325	6.44739	6.32007	6.27295	3.3357	1.73799	3.3357	up	1.79336e-09	1.05509e-08
101060376	TBC1D3L	TBC1 domain family member 3L	7.68451	7.54391	7.4359	8.61131	8.881	8.6949	2.25683	1.1743	2.25683	up	6.85411e-09	3.33755e-08
5830	PEX5	peroxisomal biogenesis factor 5	7.0942	7.19996	7.25845	8.62603	8.48809	8.51177	2.56287	1.35776	2.56287	up	1.01443e-10	9.78307e-10
6520	SLC3A2	solute carrier family 3 (amino acid transporter heavy chain), member 2	10.5586	10.5137	10.55	11.9147	11.9823	12.0196	2.69708	1.4314	2.69708	up	1.01126e-13	6.07953e-12
84132	USP42	ubiquitin specific peptidase 42	4.69681	4.68883	4.8305	6.12622	6.17071	6.20109	2.68942	1.42729	2.68942	up	3.02157e-09	1.64014e-08
10772	SRSF10	serine/arginine-rich splicing factor 10	7.58596	7.54028	7.72718	5.54901	5.8018	5.74179	-3.78495	-1.92027	3.78495	down	8.25315e-11	8.2907e-10
672	BRCA1	breast cancer 1	7.98861	7.77	7.92384	6.44218	6.17219	6.28919	-3.01668	-1.59296	3.01668	down	5.09724e-10	3.67866e-09
119548	PNLIPRP3	pancreatic lipase-related protein 3	4.57388	4.55607	4.83892	6.45951	6.61503	6.44116	3.60236	1.84894	3.60236	up	9.33841e-10	6.09923e-09
4713	NDUFB7	NADH:ubiquinone oxidoreductase subunit B7	10.0805	10.0559	10.1514	8.6567	8.73019	8.64182	-2.67527	-1.41968	2.67527	down	1.11862e-12	3.19302e-11
6046	BRD2	bromodomain containing 2	10.165	10.1251	10.2151	11.4903	11.4649	11.5203	2.50263	1.32344	2.50263	up	2.50472e-13	1.12373e-11
9145	SYNGR1	synaptogyrin 1	8.2702	8.21854	8.38503	6.84135	6.91255	6.87422	-2.667	-1.41522	2.667	down	5.43004e-11	5.93704e-10
10602	CDC42EP3	CDC42 effector protein (Rho GTPase binding) 3	9.12516	9.05543	9.05918	7.80664	7.80927	7.908	-2.35973	-1.23862	2.35973	down	2.16955e-11	2.92141e-10
6416	MAP2K4	mitogen-activated protein kinase kinase 4	6.66701	6.49834	6.87782	7.85342	7.84755	7.9406	2.29655	1.19947	2.29655	up	1.85364e-08	7.94851e-08
79789	CLMN	calmin (calponin-like, transmembrane)	4.66501	4.63626	4.52391	5.55196	5.87697	5.84591	2.21896	1.14989	2.21896	up	2.91906e-07	9.29033e-07
84265	POLR3GL	polymerase (RNA) III (DNA directed) polypeptide G (32kD)-like	7.87299	7.94148	7.84757	5.92971	6.02427	5.99512	-3.74331	-1.90431	3.74331	down	4.22909e-12	8.41921e-11
84765	ZNF577	zinc finger protein 577	5.77243	5.50477	5.65638	4.07293	4.71816	4.54005	-2.29869	-1.20081	2.29869	down	5.17582e-06	1.30082e-05
23049	SMG1	SMG1 phosphatidylinositol 3-kinase-related kinase	5.09911	5.16669	4.96666	7.94784	7.83841	7.85902	6.98505	2.80427	6.98505	up	4.30812e-13	1.65534e-11
9526	MPDU1	mannose-P-dolichol utilization defect 1	10.2371	10.1576	10.2599	9.08381	9.02148	9.13292	-2.20198	-1.1388	2.20198	down	1.58152e-11	2.28814e-10
9764	KIAA0513	KIAA0513	3.69746	3.65994	3.90803	4.97336	5.22072	4.99987	2.47857	1.30951	2.47857	up	1.23399e-07	4.25977e-07
140460	ASB7	ankyrin repeat and SOCS box containing 7	4.51149	4.50661	4.6259	5.84619	5.96444	6.07561	2.6649	1.41408	2.6649	up	9.06722e-09	4.25354e-08
142	PARP1	poly(ADP-ribose) polymerase 1	10.8854	10.8009	10.794	9.55803	9.54787	9.60166	-2.39091	-1.25756	2.39091	down	1.07652e-12	3.10689e-11
144193	AMDHD1	amidohydrolase domain containing 1	4.43723	4.72319	4.59068	3.83891	3.27506	3.46043	-2.08334	-1.0589	2.08334	down	1.30495e-05	3.05736e-05
54566	EPB41L4B	erythrocyte membrane protein band 4.1 like 4B	8.05565	7.99021	8.03372	6.94371	7.09685	6.98549	-2.02489	-1.01784	2.02489	down	2.01774e-09	1.16932e-08
286262	TPRN	taperin	6.16212	6.21117	6.16862	7.37674	7.33049	7.25063	2.20175	1.13865	2.20175	up	2.13003e-09	1.22585e-08
94239	H2AFV	H2A histone family member V	10.6164	10.5413	10.5898	9.39421	9.46375	9.46252	-2.2074	-1.14235	2.2074	down	3.31001e-12	7.02201e-11
56944	OLFML3	olfactomedin like 3	9.79343	9.70463	9.69617	7.75806	7.7643	7.87293	-3.81843	-1.93298	3.81843	down	1.5523e-13	8.0771e-12
10383	TUBB4B	tubulin, beta 4B class IVb	13.0719	12.9601	12.9383	11.2033	11.1307	11.2041	-3.50816	-1.81071	3.50816	down	2.37081e-14	2.37647e-12
7326	UBE2G1	ubiquitin conjugating enzyme E2G 1	8.64415	8.53952	8.46247	9.6494	9.85197	9.94583	2.40664	1.26702	2.40664	up	1.02096e-09	6.55667e-09
118987	PDZD8	PDZ domain containing 8	7.3689	7.19055	7.31189	8.69688	8.85418	8.78861	2.80781	1.48944	2.80781	up	3.96707e-11	4.63997e-10
84245	MRI1	methylthioribose-1-phosphate isomerase 1	8.33152	8.28107	8.25481	7.1084	7.1918	7.2101	-2.17201	-1.11903	2.17201	down	2.57276e-10	2.09668e-09
728113	ANXA8L1	annexin A8-like 1	6.91066	6.59015	6.68645	3.82381	4.3313	3.23269	-7.63778	-2.93315	7.63778	down	1.74315e-08	7.53007e-08
202134	FAM153B	family with sequence similarity 153 member B	6.50056	6.32676	6.60565	4.72147	5.25913	4.68883	-3.006	-1.58785	3.006	down	1.81235e-07	6.01709e-07
9532	BAG2	BCL2 associated athanogene 2	8.52569	8.47667	8.35352	5.89641	6.42375	6.45807	-4.57113	-2.19255	4.57113	down	1.13787e-09	7.17195e-09
83461	CDCA3	cell division cycle associated 3	8.49249	8.40842	8.28759	4.61954	4.86469	4.51263	-13.2741	-3.73055	13.2741	down	1.86513e-13	9.19089e-12
58499	ZNF462	zinc finger protein 462	8.44754	8.47282	8.54389	7.47887	7.36878	7.44426	-2.08124	-1.05745	2.08124	down	3.899e-10	2.94646e-09
6830	SUPT6H	SPT6 homolog, histone chaperone	6.76	6.76486	6.76	8.04677	8.01218	7.99274	2.38768	1.25561	2.38768	up	7.3831e-11	7.57353e-10
83931	STK40	serine/threonine kinase 40	7.75397	7.76685	7.72926	8.67056	8.8726	8.86406	2.07395	1.05238	2.07395	up	1.1515e-09	7.24474e-09
151887	CCDC80	coiled-coil domain containing 80	11.054	10.8565	11.0171	8.1503	8.07319	8.16709	-7.18826	-2.84564	7.18826	down	4.112e-15	8.3387e-13
7538	ZFP36	ZFP36 ring finger protein	8.63961	8.66984	8.59391	9.69343	9.7568	9.83958	2.18679	1.12882	2.18679	up	3.72752e-11	4.42602e-10
27303	RBMS3	RNA binding motif, single stranded interacting protein 3	7.78292	7.81957	7.84936	5.73737	6.07559	6.11832	-3.58057	-1.84019	3.58057	down	3.95407e-10	2.98116e-09
54989	ZNF770	zinc finger protein 770	6.47219	6.52526	6.61388	7.78615	7.77981	7.78824	2.3745	1.24762	2.3745	up	3.13315e-10	2.46198e-09
23322	RPGRIP1L	RPGRIP1-like	6.02995	5.99192	6.32663	4.6993	4.85638	4.97553	-2.41568	-1.27243	2.41568	down	1.63386e-07	5.48509e-07
78990	OTUB2	OTU deubiquitinase, ubiquitin aldehyde binding 2	5.07195	4.88017	4.85648	6.12006	6.21065	6.16996	2.34679	1.23069	2.34679	up	2.52479e-08	1.0437e-07
50804	MYEF2	myelin expression factor 2	6.15348	6.21897	6.03199	4.73573	4.68644	4.32895	-2.93042	-1.55111	2.93042	down	2.78926e-08	1.14036e-07
112479	ERI2	ERI1 exoribonuclease family member 2	8.12788	8.14627	8.06297	5.88386	6.12323	6.09532	-4.22291	-2.07824	4.22291	down	7.86427e-12	1.34022e-10
861	RUNX1	runt-related transcription factor 1	6.13215	6.20825	6.30867	7.18548	7.28001	7.26318	2.03712	1.02653	2.03712	up	1.41611e-08	6.26782e-08
26227	PHGDH	phosphoglycerate dehydrogenase	11.4743	11.526	11.6287	10.1844	10.0846	10.1108	-2.66912	-1.41636	2.66912	down	1.4162e-12	3.76982e-11
55357	TBC1D2	TBC1 domain family member 2	9.4159	9.46054	9.55161	8.05949	7.94736	7.94238	-2.81462	-1.49294	2.81462	down	5.21099e-12	9.87057e-11
2549	GAB1	GRB2 associated binding protein 1	4.76004	4.47735	4.5253	6.0178	5.84703	5.74604	2.43298	1.28273	2.43298	up	1.08471e-07	3.79269e-07
171484	FAM9C	family with sequence similarity 9 member C	8.70451	8.58327	8.58819	5.99888	6.02609	6.13595	-5.94503	-2.57168	5.94503	down	1.27709e-13	7.13944e-12
84795	PYROXD2	pyridine nucleotide-disulphide oxidoreductase domain 2	5.7213	5.4332	5.68178	4.62661	4.05313	4.35652	-2.40606	-1.26667	2.40606	down	1.70547e-06	4.68043e-06
154007	SNRNP48	small nuclear ribonucleoprotein, U11/U12 48KDa subunit	6.48923	6.32271	6.38127	8.11147	8.0221	8.21733	3.29261	1.71923	3.29261	up	3.6904e-11	4.38995e-10
80119	PIF1	PIF1 5'-to-3' DNA helicase	7.13455	7.2073	7.21658	4.75341	5.20123	4.96486	-4.63631	-2.21298	4.63631	down	2.0537e-10	1.73895e-09
25888	ZNF473	zinc finger protein 473	6.8213	6.82267	7.01948	9.13981	9.09259	9.0795	4.64652	2.21615	4.64652	up	4.23804e-13	1.64133e-11
2146	EZH2	enhancer of zeste 2 polycomb repressive complex 2 subunit	8.66555	8.7254	8.4221	6.91809	7.15721	7.2932	-2.79242	-1.48152	2.79242	down	6.14048e-09	3.03275e-08
19	ABCA1	ATP binding cassette subfamily A member 1	8.96862	8.9102	8.89601	7.46943	7.54907	7.58531	-2.6214	-1.39034	2.6214	down	9.14463e-12	1.5097e-10
26149	ZNF658	zinc finger protein 658	5.95416	5.74284	5.80766	4.34501	4.60961	4.58247	-2.50103	-1.32252	2.50103	down	5.15103e-08	1.96014e-07
5277	PIGA	phosphatidylinositol glycan anchor biosynthesis class A	6.2473	6.18628	6.24333	7.27851	7.25254	7.18456	2.01796	1.0129	2.01796	up	6.77366e-09	3.30249e-08
259266	ASPM	abnormal spindle microtubule assembly	9.03817	9.13879	9.08301	5.52772	5.68636	5.86381	-10.5124	-3.39403	10.5124	down	6.56445e-14	4.64708e-12
23234	DNAJC9	DnaJ heat shock protein family (Hsp40) member C9	9.72521	9.67293	9.77242	8.01245	8.12525	8.00872	-3.19256	-1.67471	3.19256	down	6.36471e-13	2.13704e-11
79582	SPAG16	sperm associated antigen 16	6.8563	6.61699	6.67857	4.84718	5.49525	5.38987	-2.77634	-1.47319	2.77634	down	5.04754e-07	1.52688e-06
10092	ARPC5	actin related protein 2/3 complex subunit 5	10.7098	10.7072	10.6734	9.54363	9.63382	9.60684	-2.14658	-1.10204	2.14658	down	3.44422e-12	7.2399e-11
116442	RAB39B	RAB39B, member RAS oncogene family	6.47182	6.44124	6.53483	5.44522	5.32126	5.17541	-2.24804	-1.16867	2.24804	down	3.79177e-08	1.49396e-07
387263	C6orf120	chromosome 6 open reading frame 120	8.87298	8.74914	8.70144	7.49942	7.52903	7.58025	-2.35918	-1.23829	2.35918	down	1.05498e-10	1.00845e-09
222234	FAM185A	family with sequence similarity 185 member A	6.10762	5.55593	6.14757	4.80791	4.27945	4.31911	-2.7668	-1.46822	2.7668	down	2.87807e-06	7.56891e-06
57661	PHRF1	PHD and ring finger domains 1	7.30808	7.1061	7.22318	8.45581	8.21914	8.17455	2.10047	1.07071	2.10047	up	2.32256e-08	9.70163e-08
84904	ARHGEF39	Rho guanine nucleotide exchange factor 39	5.82334	5.50793	5.93203	3.92829	4.31547	3.87515	-3.2825	-1.7148	3.2825	down	7.4004e-08	2.69863e-07
27235	COQ2	coenzyme Q2 4-hydroxybenzoate polyprenyltransferase	9.30552	9.22419	9.17625	7.96345	7.97453	7.98307	-2.39768	-1.26164	2.39768	down	1.19792e-11	1.86279e-10
80757	TMEM121	transmembrane protein 121	6.12396	6.14367	6.20472	4.85483	4.91121	4.75149	-2.49367	-1.31827	2.49367	down	7.09949e-09	3.43733e-08
1953	MEGF6	multiple EGF-like-domains 6	8.69696	8.66015	8.80696	6.58407	6.52516	6.59525	-4.44812	-2.1532	4.44812	down	3.26489e-13	1.37185e-11
8677	STX10	syntaxin 10	9.65601	9.68045	9.79646	8.68846	8.59941	8.61893	-2.10727	-1.07537	2.10727	down	8.78569e-11	8.70924e-10
11007	CCDC85B	coiled-coil domain containing 85B	10.2052	10.1489	10.2863	6.30259	6.21886	6.20819	-15.6736	-3.97027	15.6736	down	1.03063e-16	9.15319e-14
1875	E2F5	E2F transcription factor 5, p130-binding	7.54299	7.45175	7.58624	5.50308	5.90533	5.74069	-3.50795	-1.81063	3.50795	down	6.96279e-10	4.75756e-09
2770	GNAI1	guanine nucleotide binding protein (G protein), alpha inhibiting activity polypeptide 1	9.53288	9.60202	9.46701	6.73715	7.05358	6.93363	-6.17248	-2.62585	6.17248	down	4.58378e-13	1.72066e-11
5358	PLS3	plastin 3	11.5213	11.526	11.5704	10.3311	10.409	10.3721	-2.24777	-1.1685	2.24777	down	6.93863e-13	2.26706e-11
28990	ASTE1	asteroid homolog 1 (Drosophila)	6.55515	6.45349	6.70708	4.52863	4.56464	4.70427	-3.92509	-1.97273	3.92509	down	2.47441e-10	2.02918e-09
64395	GMCL1	germ cell-less, spermatogenesis associated 1	4.96292	4.80971	4.78143	3.55426	3.89861	3.89886	-2.09572	-1.06744	2.09572	down	1.90102e-06	5.17278e-06
63901	FAM111A	family with sequence similarity 111 member A	10.3949	10.2974	10.3075	7.91815	7.84861	7.868	-5.48311	-2.45499	5.48311	down	2.60798e-15	6.40285e-13
5796	PTPRK	protein tyrosine phosphatase, receptor type, K	7.79054	7.7549	7.73019	9.0257	9.09787	9.04453	2.45801	1.29749	2.45801	up	6.84947e-12	1.20784e-10
91433	RCCD1	RCC1 domain containing 1	9.67017	9.51006	9.48328	7.0737	7.13889	7.03821	-5.54391	-2.4709	5.54391	down	6.27472e-14	4.50039e-12
55356	SLC22A15	solute carrier family 22, member 15	7.49762	7.29146	7.29861	8.6612	8.75058	8.69355	2.53013	1.33921	2.53013	up	1.60259e-10	1.41877e-09
23318	ZCCHC11	zinc finger, CCHC domain containing 11	6.88196	6.8461	6.85281	7.79405	8.12732	8.10346	2.21604	1.14799	2.21604	up	1.7985e-08	7.74178e-08
4173	MCM4	minichromosome maintenance complex component 4	8.62094	8.56089	8.67367	6.61315	6.78458	6.91924	-3.59546	-1.84618	3.59546	down	2.92762e-11	3.66511e-10
4017	LOXL2	lysyl oxidase like 2	6.73911	6.59509	6.78383	5.32622	4.9212	5.07937	-3.0253	-1.59708	3.0253	down	8.78143e-09	4.13635e-08
147184	TMEM99	transmembrane protein 99	8.43915	8.53567	8.5409	7.2644	7.41547	7.2613	-2.28393	-1.19152	2.28393	down	3.23431e-10	2.52898e-09
55304	SPTLC3	serine palmitoyltransferase, long chain base subunit 3	7.91789	7.86909	7.86172	6.12575	6.20143	6.14299	-3.3085	-1.72618	3.3085	down	7.35517e-12	1.27855e-10
401541	CENPP	centromere protein P	7.08668	7.29861	7.3883	5.716	6.08608	5.94841	-2.53333	-1.34103	2.53333	down	4.39919e-08	1.70222e-07
4693	NDP	Norrie disease (pseudoglioma)	6.13145	5.97005	6.22965	4.16517	4.48511	4.15933	-3.58137	-1.84051	3.58137	down	3.66493e-09	1.93664e-08
51104	ABHD17B	abhydrolase domain containing 17B	5.92193	5.94452	6.04747	7.59587	7.89346	7.78889	3.4536	1.7881	3.4536	up	1.3858e-10	1.25674e-09
340371	NRBP2	nuclear receptor binding protein 2	6.41676	6.42465	6.51772	5.33086	4.99191	5.02506	-2.52643	-1.3371	2.52643	down	3.28354e-08	1.31682e-07
4323	MMP14	matrix metallopeptidase 14 (membrane-inserted)	6.86046	6.88739	6.97859	8.06547	8.08295	8.10535	2.25914	1.17578	2.25914	up	2.38266e-10	1.96719e-09
3397	ID1	inhibitor of DNA binding 1, dominant negative helix-loop-helix protein	10.0446	10.0108	10.0453	8.41617	8.41367	8.38381	-3.09304	-1.62902	3.09304	down	6.31896e-14	4.52246e-12
729234	FAHD2CP	fumarylacetoacetate hydrolase domain containing 2C, pseudogene	9.84444	9.81127	9.92793	8.12979	8.032	8.04313	-3.46512	-1.79291	3.46512	down	2.36555e-13	1.08622e-11
26134	RALGAPA1P	Ral GTPase activating protein, alpha subunit 1 (catalytic) pseudogene	5.59496	5.68656	5.70689	7.25493	7.1237	7.12517	2.8385	1.50513	2.8385	up	3.41801e-10	2.64959e-09
79870	BAALC	brain and acute leukemia, cytoplasmic	5.69966	5.71264	5.65638	4.56942	4.0598	4.35796	-2.56774	-1.3605	2.56774	down	2.04988e-07	6.73606e-07
81031	SLC2A10	solute carrier family 2 (facilitated glucose transporter), member 10	5.88226	5.94972	6.06698	4.15428	3.94866	4.21096	-3.63432	-1.86169	3.63432	down	1.03462e-09	6.63179e-09
80127	BBOF1	basal body orientation factor 1	5.35808	5.60597	5.63485	4.36389	4.50481	4.30473	-2.2066	-1.14182	2.2066	down	3.07768e-07	9.74055e-07
254251	LCORL	ligand dependent nuclear receptor corepressor like	5.9046	5.73457	5.90823	6.90008	7.05999	7.05338	2.22738	1.15535	2.22738	up	1.50895e-08	6.62456e-08
116987	AGAP1	ArfGAP with GTPase domain, ankyrin repeat and PH domain 1	7.44406	7.29861	7.5201	8.63848	8.5799	8.64182	2.29603	1.19914	2.29603	up	4.13589e-10	3.09021e-09
26128	KIF1BP	KIF1 binding protein	9.44842	9.41949	9.42082	7.95472	7.83	7.9924	-2.83602	-1.50387	2.83602	down	3.40315e-12	7.16899e-11
8187	ZNF239	zinc finger protein 239	6.71631	6.81365	6.90691	5.57875	5.74363	5.57868	-2.26358	-1.1786	2.26358	down	1.72669e-08	7.47135e-08
9253	NUMBL	numb homolog (Drosophila)-like	7.8236	7.77217	7.86441	8.93213	9.00323	8.94023	2.20147	1.13847	2.20147	up	4.56648e-11	5.1708e-10
29914	UBIAD1	UbiA prenyltransferase domain containing 1	7.32668	7.59027	7.69214	8.75106	8.76293	8.77127	2.33819	1.22539	2.33819	up	4.76544e-09	2.42757e-08
30837	SOCS7	suppressor of cytokine signaling 7	4.88712	4.82659	4.7566	5.58719	5.98329	5.98665	2.04052	1.02894	2.04052	up	1.99814e-06	5.41254e-06
7320	UBE2B	ubiquitin conjugating enzyme E2B	9.51798	9.36478	9.41819	10.3763	10.6246	10.6181	2.15256	1.10605	2.15256	up	1.55282e-09	9.3526e-09
7174	TPP2	tripeptidyl peptidase II	7.70114	7.78312	7.82262	8.73796	8.83286	8.85953	2.05788	1.04116	2.05788	up	4.25365e-10	3.16609e-09
26511	CHIC2	cysteine rich hydrophobic domain 2	8.6472	8.67849	8.71232	10.0577	10.1666	10.1526	2.72506	1.44629	2.72506	up	8.48445e-13	2.61717e-11
152992	TRMT44	tRNA methyltransferase 44 homolog (S. cerevisiae)	6.01794	6.0033	5.94913	7.28057	7.28505	7.29368	2.456	1.29631	2.456	up	4.07553e-10	3.05739e-09
55222	LRRC20	leucine rich repeat containing 20	8.24752	8.07983	8.1696	7.02394	6.90638	6.9073	-2.32911	-1.21978	2.32911	down	5.03865e-10	3.64621e-09
23314	SATB2	SATB homeobox 2	4.53683	4.68476	4.8515	5.48149	5.87517	5.88026	2.07716	1.05461	2.07716	up	3.67985e-06	9.48533e-06
283455	KSR2	kinase suppressor of ras 2	9.47405	9.44154	9.45828	6.59467	6.60237	6.68808	-7.10869	-2.82958	7.10869	down	2.40595e-15	6.18535e-13
51157	ZNF580	zinc finger protein 580	7.04099	7.35239	7.24595	5.42102	5.5424	5.42997	-3.36043	-1.74865	3.36043	down	4.7271e-10	3.45337e-09
3840	KPNA4	karyopherin alpha 4 (importin alpha 3)	9.71448	9.75032	9.64701	10.7	10.8348	10.8812	2.14565	1.10141	2.14565	up	7.73985e-11	7.85789e-10
55166	CENPQ	centromere protein Q	7.82156	7.9911	7.78756	5.88352	6.14503	6.04656	-3.58433	-1.8417	3.58433	down	1.06867e-10	1.01783e-09
64342	HS1BP3	HCLS1 binding protein 3	8.37727	8.36416	8.45278	7.47513	7.11781	7.09791	-2.24667	-1.16779	2.24667	down	2.98164e-08	1.20953e-07
4286	MITF	microphthalmia-associated transcription factor	8.65082	8.64155	8.72103	6.91318	7.09211	7.14569	-3.07547	-1.62081	3.07547	down	2.76572e-11	3.51239e-10
29781	NCAPH2	non-SMC condensin II complex subunit H2	9.49541	9.47955	9.57321	8.02426	7.8359	7.85681	-3.05336	-1.6104	3.05336	down	5.45156e-12	1.01637e-10
4061	LY6E	lymphocyte antigen 6 complex, locus E	7.95963	8.00188	8.13152	6.82465	6.69884	6.74932	-2.41732	-1.27341	2.41732	down	4.45928e-10	3.28908e-09
64801	ARV1	ARV1 homolog, fatty acid homeostasis modulator	8.69924	8.5662	8.84026	6.96567	6.9426	6.67857	-3.57916	-1.83962	3.57916	down	1.56361e-10	1.38961e-09
220042	DDIAS	DNA damage-induced apoptosis suppressor	8.26834	8.27703	8.3761	6.61732	6.50456	6.32401	-3.54354	-1.82519	3.54354	down	4.28152e-11	4.9194e-10
23136	EPB41L3	erythrocyte membrane protein band 4.1-like 3	5.84529	5.85221	5.84925	5.07684	4.75839	4.54578	-2.07807	-1.05525	2.07807	down	2.79072e-06	7.36296e-06
403	ARL3	ADP ribosylation factor like GTPase 3	9.76722	9.71754	9.64524	8.31358	8.36182	8.33282	-2.59175	-1.37393	2.59175	down	2.35826e-12	5.43925e-11
201163	FLCN	folliculin	7.21112	7.12707	7.05368	8.58293	8.58457	8.45425	2.6573	1.40996	2.6573	up	6.29608e-11	6.66572e-10
401474	SAMD12	sterile alpha motif domain containing 12	6.69114	6.42454	6.67851	4.72319	5.2742	5.38937	-2.76857	-1.46914	2.76857	down	7.81561e-07	2.27799e-06
91010	FMNL3	formin like 3	6.05883	5.99477	6.08615	7.92688	7.98085	7.92529	3.72633	1.89776	3.72633	up	2.99516e-12	6.52591e-11
6235	RPS29	ribosomal protein S29	6.18296	6.47784	6.29996	7.54253	7.45183	7.48953	2.25695	1.17438	2.25695	up	1.02691e-08	4.73324e-08
730087	ZNF726	zinc finger protein 726	5.44919	5.54705	5.54755	4.03733	4.0598	4.03503	-2.77126	-1.47054	2.77126	down	3.67626e-09	1.94158e-08
126731	CCSAP	centriole, cilia and spindle-associated protein	7.94506	7.83754	8.03929	9.04203	8.97629	9.03095	2.10788	1.07579	2.10788	up	4.74074e-10	3.4601e-09
819	CAMLG	calcium modulating ligand	9.10347	9.11107	9.14152	10.7646	10.7833	10.802	3.17027	1.66461	3.17027	up	1.61274e-14	1.92138e-12
57608	KIAA1462	KIAA1462	5.5491	5.27673	5.40747	6.51434	6.80167	6.81508	2.46103	1.29926	2.46103	up	5.63236e-08	2.11997e-07
84899	TMTC4	transmembrane and tetratricopeptide repeat containing 4	5.68936	5.89566	5.90533	3.4475	4.11184	3.91121	-4.01834	-2.0066	4.01834	down	2.85221e-08	1.16366e-07
51232	CRIM1	cysteine rich transmembrane BMP regulator 1 (chordin-like)	11.7533	11.8223	11.861	10.0622	9.94189	10.0143	-3.49692	-1.80609	3.49692	down	3.82617e-14	3.2378e-12
143684	FAM76B	family with sequence similarity 76 member B	5.14819	5.38629	5.2961	6.3236	6.50657	6.53511	2.26299	1.17823	2.26299	up	6.01668e-08	2.24581e-07
92017	SNX29	sorting nexin 29	5.89055	5.8906	5.97103	8.23795	8.11308	8.17476	4.78285	2.25787	4.78285	up	5.78373e-13	2.01436e-11
5728	PTEN	phosphatase and tensin homolog	7.70538	7.74291	7.66684	8.77351	8.8488	8.85273	2.17342	1.11997	2.17342	up	6.57242e-11	6.88561e-10
27077	B9D1	B9 protein domain 1	8.867	8.7898	8.88902	5.97784	6.03361	5.92129	-7.31586	-2.87103	7.31586	down	1.5611e-14	1.89387e-12
23473	CAPN7	calpain 7	8.42537	8.39088	8.3735	9.59306	9.68288	9.75895	2.43128	1.28171	2.43128	up	1.33522e-11	2.02313e-10
441155	LOC441155	zinc finger CCCH-type domain-containing-like	7.23772	7.15605	7.20651	8.28141	8.25915	8.35055	2.13901	1.09694	2.13901	up	2.78005e-10	2.23485e-09
4919	ROR1	receptor tyrosine kinase-like orphan receptor 1	6.46808	6.5209	6.56971	4.75653	4.35052	4.7288	-3.75188	-1.90761	3.75188	down	1.98334e-09	1.15197e-08
84188	FAR1	fatty acyl CoA reductase 1	9.15776	9.03946	9.09766	7.5369	7.68282	7.70473	-2.74501	-1.45681	2.74501	down	1.96059e-11	2.69699e-10
1466	CSRP2	cysteine and glycine rich protein 2	8.36453	8.30397	8.26063	6.25455	6.39747	6.53262	-3.77069	-1.91483	3.77069	down	1.80164e-11	2.52792e-10
54165	DCUN1D1	DCN1, defective in cullin neddylation 1, domain containing 1	7.48454	7.56761	7.58322	8.59905	8.72773	8.74656	2.21298	1.14599	2.21298	up	2.53716e-10	2.07589e-09
55279	ZNF654	zinc finger protein 654	6.65463	6.67402	6.6487	8.86822	8.9258	8.82581	4.64011	2.21416	4.64011	up	7.01482e-14	4.84327e-12
3915	LAMC1	laminin subunit gamma 1	4.48787	4.49032	4.65943	5.5522	5.73972	5.61404	2.12792	1.08945	2.12792	up	1.92967e-07	6.36874e-07
26146	TRAF3IP1	TRAF3 interacting protein 1	6.14004	6.07086	6.27138	7.56562	7.70498	7.54711	2.7229	1.44514	2.7229	up	5.66603e-10	4.01982e-09
54472	TOLLIP	toll interacting protein	6.52612	6.53692	6.47416	8.00454	8.1012	8.015	2.88355	1.52785	2.88355	up	1.98923e-11	2.72939e-10
1678	TIMM8A	translocase of inner mitochondrial membrane 8 homolog A (yeast)	7.03696	6.8551	6.75624	5.05116	5.13508	5.33607	-3.26858	-1.70866	3.26858	down	2.10151e-09	1.21247e-08
644538	SMIM10	small integral membrane protein 10	9.00444	8.95984	8.95984	6.11479	6.44187	6.49881	-6.1598	-2.62288	6.1598	down	3.00269e-12	6.52591e-11
83852	SETDB2	SET domain, bifurcated 2	6.12458	6.02869	6.00725	7.45583	7.74383	7.80386	3.0617	1.61433	3.0617	up	1.12496e-09	7.1064e-09
57758	SCUBE2	signal peptide, CUB domain, EGF-like 2	4.03649	4.30114	3.8266	5.29825	5.23323	5.23323	2.29765	1.20016	2.29765	up	6.74244e-07	1.99029e-06
10204	NUTF2	nuclear transport factor 2	7.70114	7.45035	7.51057	6.56144	6.46926	6.18854	-2.21546	-1.14761	2.21546	down	1.25454e-07	4.32245e-07
665	BNIP3L	BCL2/adenovirus E1B 19kDa interacting protein 3-like	9.95337	9.90253	9.96358	11.6019	11.7022	11.7103	3.3211	1.73166	3.3211	up	2.98006e-14	2.76608e-12
23527	ACAP2	ArfGAP with coiled-coil, ankyrin repeat and PH domains 2	5.97283	5.91333	6.01462	8.18262	8.29603	8.32901	4.93241	2.30229	4.93241	up	5.70736e-13	1.99309e-11
1398	CRK	v-crk avian sarcoma virus CT10 oncogene homolog	7.98926	7.96817	8.06822	9.19281	9.15872	9.18582	2.251	1.17057	2.251	up	1.95733e-11	2.69414e-10
8897	MTMR3	myotubularin related protein 3	8.10364	8.1761	8.06937	10.0015	10.0792	10.0382	3.79278	1.92326	3.79278	up	4.9187e-14	3.77308e-12
10299	MARCH6	membrane associated ring-CH-type finger 6	9.34668	9.37791	9.43709	10.8701	10.9002	10.9089	2.83991	1.50585	2.83991	up	9.77551e-14	5.95012e-12
84553	FAXC	failed axon connections homolog	7.32745	7.37491	7.56335	6.48307	6.31296	6.32649	-2.06727	-1.04773	2.06727	down	3.73164e-08	1.47413e-07
196264	MPZL3	myelin protein zero-like 3	6.61545	6.66693	6.80108	5.34917	5.51908	5.32951	-2.45417	-1.29523	2.45417	down	9.56934e-09	4.4538e-08
83856	FSD1L	fibronectin type III and SPRY domain containing 1-like	4.39329	4.53729	4.40177	5.64328	6.06165	5.99477	2.74305	1.45578	2.74305	up	6.03146e-08	2.2509e-07
9824	ARHGAP11A	Rho GTPase activating protein 11A	6.0317	6.1757	6.2057	4.83544	4.95185	5.0672	-2.27553	-1.1862	2.27553	down	5.79327e-08	2.17342e-07
653316	FAM153C	family with sequence similarity 153, member C	6.50056	6.32676	6.60565	4.72147	5.25913	4.68883	-3.006	-1.58785	3.006	down	1.81235e-07	6.01709e-07
3709	ITPR2	inositol 1,4,5-trisphosphate receptor, type 2	5.26558	4.97484	5.03257	6.04527	6.35361	6.36949	2.24253	1.16513	2.24253	up	4.27352e-07	1.31142e-06
7289	TULP3	tubby like protein 3	7.20896	7.36502	7.30367	8.32539	8.3354	8.4372	2.10446	1.07345	2.10446	up	9.85587e-10	6.37223e-09
7374	UNG	uracil DNA glycosylase	9.78281	9.72923	9.80118	8.53211	8.55734	8.5161	-2.35527	-1.23589	2.35527	down	2.61096e-12	5.884e-11
55133	SRBD1	S1 RNA binding domain 1	7.26617	7.28942	7.29311	5.91937	6.05661	6.23689	-2.31649	-1.21194	2.31649	down	1.17898e-08	5.33786e-08
400966	RGPD1	RANBP2-like and GRIP domain containing 1	5.95084	5.87509	5.83524	6.92419	7.52456	7.63288	2.77692	1.47349	2.77692	up	5.13979e-07	1.5519e-06
339983	NAT8L	N-acetyltransferase 8-like (GCN5-related, putative)	6.28798	6.16133	6.38278	7.36277	7.33541	7.26292	2.06051	1.043	2.06051	up	1.76451e-08	7.61058e-08
79022	TMEM106C	transmembrane protein 106C	10.3164	10.3027	10.4684	8.49995	8.3642	8.37818	-3.85945	-1.9484	3.85945	down	3.96267e-13	1.56838e-11
677	ZFP36L1	ZFP36 ring finger protein-like 1	5.27388	5.35938	5.57985	4.6407	4.02816	4.13122	-2.20026	-1.13768	2.20026	down	1.03334e-05	2.47e-05
332	BIRC5	baculoviral IAP repeat containing 5	11.0821	11.0396	11.1357	7.65695	7.48655	7.38671	-11.9232	-3.5757	11.9232	down	1.60239e-15	4.92051e-13
112885	PHF21B	PHD finger protein 21B	6.60592	6.49206	6.5248	8.44788	8.27628	8.4037	3.56778	1.83503	3.56778	up	5.85314e-12	1.0698e-10
2717	GLA	galactosidase alpha	8.36157	8.32988	8.32836	9.85538	9.87642	9.96231	2.94466	1.5581	2.94466	up	3.75133e-13	1.51125e-11
25809	TTLL1	tubulin tyrosine ligase like 1	5.60246	5.59875	5.79007	4.3667	4.48981	4.29199	-2.42995	-1.28093	2.42995	down	4.44822e-08	1.71932e-07
2308	FOXO1	forkhead box O1	3.91527	4.40271	4.50187	5.56555	5.68329	5.72526	2.61127	1.38475	2.61127	up	6.63569e-07	1.96323e-06
1050	CEBPA	CCAAT/enhancer binding protein (C/EBP), alpha	5.9936	5.55594	6.13424	6.95893	6.97532	6.87674	2.05966	1.0424	2.05966	up	3.3615e-06	8.72399e-06
3836	KPNA1	karyopherin alpha 1	8.22447	8.23619	8.32424	9.30904	9.36037	9.32629	2.09982	1.07027	2.09982	up	4.51382e-11	5.12454e-10
254268	AKNAD1	AKNA domain containing 1	4.08171	4.12482	3.98823	5.25058	5.71799	5.69407	2.80751	1.48929	2.80751	up	1.1893e-07	4.11772e-07
2122	MECOM	MDS1 and EVI1 complex locus	6.6851	6.79204	6.71428	4.68883	4.73671	4.76657	-3.99936	-1.99977	3.99936	down	3.3527e-11	4.07e-10
6752	SSTR2	somatostatin receptor 2	3.57198	3.77301	3.7751	5.30684	5.40405	5.5297	3.26444	1.70683	3.26444	up	3.70871e-09	1.95475e-08
694	BTG1	B-cell translocation gene 1, anti-proliferative	9.78535	9.83963	9.8412	11.464	11.5721	11.5953	3.29832	1.72173	3.29832	up	5.75887e-14	4.22969e-12
55334	SLC39A9	solute carrier family 39, member 9	5.63592	5.53302	5.50836	6.56461	6.66847	6.58899	2.06803	1.04826	2.06803	up	2.97909e-08	1.20861e-07
6309	SC5D	sterol-C5-desaturase	8.67011	8.62297	8.62238	10.2014	10.2767	10.3168	3.0876	1.62649	3.0876	up	1.82146e-13	9.02769e-12
51019	CCDC53	coiled-coil domain containing 53	8.94439	8.86326	8.86646	7.60009	7.63494	7.65248	-2.39861	-1.2622	2.39861	down	1.45391e-11	2.15292e-10
723961	INS-IGF2	INS-IGF2 readthrough	4.0862	4.13757	3.90659	5.92807	6.00675	6.03913	3.85803	1.94786	3.85803	up	3.45867e-10	2.67315e-09
29095	ORMDL2	ORMDL sphingolipid biosynthesis regulator 2	10.2312	10.1776	10.2451	8.75509	8.73569	8.71402	-2.79535	-1.48303	2.79535	down	1.87445e-13	9.22517e-12
8658	TNKS	tankyrase, TRF1-interacting ankyrin-related ADP-ribose polymerase	7.9276	7.94913	8.06966	10.1392	10.239	10.2281	4.65884	2.21997	4.65884	up	3.39321e-14	2.99315e-12
57132	CHMP1B	charged multivesicular body protein 1B	8.79379	8.65679	8.64635	10.0227	10.2545	10.2821	2.80392	1.48745	2.80392	up	8.39847e-11	8.41289e-10
2305	FOXM1	forkhead box M1	8.84547	8.80069	8.78064	7.15753	7.05999	7.1435	-3.22342	-1.68859	3.22342	down	1.30309e-12	3.55097e-11
1967	EIF2B1	eukaryotic translation initiation factor 2B subunit alpha	6.63695	6.39087	6.35359	5.15134	5.44625	5.54716	-2.11241	-1.07889	2.11241	down	1.14123e-06	3.22948e-06
441327	FAM90A9P	putative protein FAM90A9	4.92703	4.91918	4.68883	7.44994	7.449	7.43409	6.06005	2.59933	6.06005	up	2.92288e-12	6.40232e-11
54965	PIGX	phosphatidylinositol glycan anchor biosynthesis class X	8.54089	8.55249	8.53698	7.05805	7.04635	7.04822	-2.81392	-1.49258	2.81392	down	3.05412e-12	6.61196e-11
139201	MAP2K4P1	mitogen-activated protein kinase kinase 4 pseudogene 1	7.1281	7.05902	7.13547	8.31938	8.30555	8.3156	2.30694	1.20598	2.30694	up	6.49231e-11	6.82172e-10
54881	TEX10	testis expressed 10	8.30382	8.36486	8.32361	9.48449	9.62502	9.65146	2.3887	1.25623	2.3887	up	2.67817e-11	3.43243e-10
56243	KIAA1217	KIAA1217	5.40502	5.4936	5.55978	6.73747	6.91158	6.98378	2.62347	1.39148	2.62347	up	4.15186e-09	2.15519e-08
23048	FNBP1	formin binding protein 1	5.97579	6.09015	6.24911	7.07528	7.0991	7.1676	2.01248	1.00898	2.01248	up	6.41285e-08	2.37767e-07
4113	MAGEB2	MAGE family member B2	6.58649	6.51084	6.45289	5.19569	5.09472	5.0382	-2.65223	-1.4072	2.65223	down	2.6097e-09	1.45084e-08
219699	UNC5B	unc-5 netrin receptor B	4.50667	4.62837	4.92172	5.74422	5.63023	5.88195	2.09441	1.06655	2.09441	up	1.81534e-06	4.95861e-06
56652	C10orf2	chromosome 10 open reading frame 2	7.60103	7.61745	7.70461	8.83867	8.84998	8.8243	2.29202	1.19662	2.29202	up	3.12796e-11	3.86216e-10
59	ACTA2	actin, alpha 2, smooth muscle, aorta	10.0234	9.97832	10.0395	6.80866	7.01928	6.9737	-8.45527	-3.07985	8.45527	down	4.53051e-15	8.67838e-13
10171	RCL1	RNA terminal phosphate cyclase-like 1	7.78969	7.80614	7.89081	9.53635	9.45793	9.46362	3.15379	1.65709	3.15379	up	5.717e-13	1.99467e-11
661	POLR3D	polymerase (RNA) III (DNA directed) polypeptide D, 44kDa	7.85157	7.78125	7.8791	9.34748	9.35949	9.33804	2.85013	1.51103	2.85013	up	9.43714e-13	2.81508e-11
11128	POLR3A	polymerase (RNA) III (DNA directed) polypeptide A, 155kDa	7.55214	7.44981	7.45556	8.79459	8.83382	8.76701	2.48395	1.31264	2.48395	up	1.80162e-11	2.52792e-10
7398	USP1	ubiquitin specific peptidase 1	9.21796	9.25904	9.22355	7.81657	7.95188	7.83048	-2.57971	-1.36721	2.57971	down	8.33423e-12	1.40339e-10
4707	NDUFB1	NADH:ubiquinone oxidoreductase subunit B1	11.1868	11.1847	11.2324	9.69731	9.71506	9.7338	-2.80098	-1.48593	2.80098	down	3.69988e-14	3.16503e-12
84133	ZNRF3	zinc and ring finger 3	6.95592	6.91211	6.91708	8.37765	8.51902	8.55786	2.94134	1.55647	2.94134	up	1.75867e-11	2.48279e-10
10733	PLK4	polo-like kinase 4	9.24199	9.06138	9.10879	6.78508	6.78359	6.69269	-5.21837	-2.3836	5.21837	down	1.30431e-13	7.25017e-12
54821	ERCC6L	excision repair cross-complementation group 6 like	7.49801	7.52417	7.65321	4.4162	4.67821	4.75884	-7.67791	-2.94071	7.67791	down	3.69484e-12	7.633e-11
133022	TRAM1L1	translocation associated membrane protein 1-like 1	6.66964	6.94751	6.83949	5.51435	5.55323	5.4889	-2.46238	-1.30005	2.46238	down	7.98149e-09	3.8138e-08
79618	HMBOX1	homeobox containing 1	5.03024	5.15213	5.33819	7.33688	7.18116	7.15876	4.14703	2.05208	4.14703	up	1.27289e-10	1.17396e-09
1111	CHEK1	checkpoint kinase 1	8.8356	8.82802	8.8239	7.28902	7.34213	7.37633	-2.81541	-1.49335	2.81541	down	2.49971e-12	5.66268e-11
84861	KLHL22	kelch like family member 22	7.04525	7.01138	7.11654	5.56152	5.83687	5.66335	-2.58556	-1.37048	2.58556	down	3.69386e-09	1.94876e-08
201176	ARHGAP27	Rho GTPase activating protein 27	7.22381	7.30951	7.44282	8.45154	8.41894	8.36349	2.12276	1.08594	2.12276	up	1.63465e-09	9.77014e-09
2242	FES	FES proto-oncogene, tyrosine kinase	6.77406	6.80182	6.92812	5.88354	5.3126	5.2465	-2.55582	-1.35379	2.55582	down	8.99193e-07	2.59262e-06
152100	CMC1	C-x(9)-C motif containing 1	8.35755	8.09065	7.97045	6.39272	6.60249	6.61988	-3.03393	-1.60119	3.03393	down	2.48395e-09	1.39222e-08
8515	ITGA10	integrin alpha 10	5.46643	5.82269	5.81526	6.73458	6.89055	6.73865	2.12353	1.08647	2.12353	up	3.43112e-07	1.07538e-06
53349	ZFYVE1	zinc finger, FYVE domain containing 1	6.50649	6.5436	6.62354	7.92396	8.00115	7.97049	2.65245	1.40732	2.65245	up	6.36522e-11	6.7189e-10
6404	SELPLG	selectin P ligand	5.56888	5.37556	5.33556	7.55853	7.15362	7.20769	3.68061	1.87995	3.68061	up	1.76823e-09	1.04313e-08
7042	TGFB2	transforming growth factor beta 2	8.82048	8.79407	8.74732	6.44503	6.44831	6.25131	-5.29907	-2.40574	5.29907	down	3.25619e-13	1.37105e-11
5257	PHKB	phosphorylase kinase, beta	8.29777	8.2556	8.28984	7.24886	7.11945	7.19624	-2.133	-1.09289	2.133	down	3.51455e-10	2.70777e-09
4255	MGMT	O-6-methylguanine-DNA methyltransferase	7.1264	7.13554	7.08336	5.39393	5.41601	5.55909	-3.15744	-1.65876	3.15744	down	1.43166e-10	1.29263e-09
440081	DDX12P	DEAD/H (Asp-Glu-Ala-Asp/His) box polypeptide 12, pseudogene	8.95215	8.91035	8.95245	8.02647	7.8392	7.89544	-2.02503	-1.01795	2.02503	down	6.71041e-10	4.61181e-09
6791	AURKAPS1	aurora kinase A pseudogene 1	8.84215	8.81448	8.69616	7.4661	7.43708	7.54066	-2.46739	-1.30298	2.46739	down	5.41024e-11	5.91705e-10
64946	CENPH	centromere protein H	9.3369	9.23816	8.98374	7.02145	7.07274	7.09557	-4.35603	-2.12301	4.35603	down	9.31761e-12	1.53243e-10
131601	TPRA1	transmembrane protein, adipocyte asscociated 1	7.55486	7.47537	7.69929	9.26951	9.11781	9.14912	3.03628	1.60231	3.03628	up	2.46677e-11	3.22742e-10
79019	CENPM	centromere protein M	10.1608	10.2661	10.2377	7.47118	7.56388	7.57316	-6.43292	-2.68547	6.43292	down	2.3895e-15	6.18374e-13
732265	LOC732265	uncharacterized LOC732265	10.7921	10.9193	10.9189	9.54453	9.49825	9.47901	-2.58386	-1.36953	2.58386	down	1.41527e-12	3.76982e-11
23244	PDS5A	PDS5 cohesin associated factor A	7.71837	7.68058	7.77843	8.99206	9.03706	9.06587	2.47233	1.30587	2.47233	up	1.03571e-11	1.65802e-10
3615	IMPDH2	IMP (inosine 5'-monophosphate) dehydrogenase 2	11.7791	11.8049	11.8103	10.5561	10.4382	10.4773	-2.47523	-1.30756	2.47523	down	3.92341e-13	1.56112e-11
390980	ZNF805	zinc finger protein 805	4.18715	4.14984	4.57549	5.97583	6.09092	6.14167	3.39948	1.76531	3.39948	up	9.4813e-09	4.41862e-08
22982	DIP2C	disco interacting protein 2 homolog C	7.1587	7.09698	7.10006	8.10541	8.22356	8.18325	2.07363	1.05216	2.07363	up	6.63313e-10	4.56987e-09
25839	COG4	component of oligomeric golgi complex 4	9.16893	9.15212	9.14832	7.96829	7.76957	7.86516	-2.44322	-1.28878	2.44322	down	4.42015e-11	5.04604e-10
57146	TMEM159	transmembrane protein 159	9.73158	9.62902	9.77729	11.1851	11.1529	11.1445	2.72869	1.44821	2.72869	up	5.5688e-13	1.96401e-11
4316	MMP7	matrix metallopeptidase 7	6.14107	6.03515	6.21241	5.08101	4.87303	4.98517	-2.21884	-1.14981	2.21884	down	6.38174e-08	2.36715e-07
3628	INPP1	inositol polyphosphate-1-phosphatase	8.37803	8.34824	8.39901	9.38161	9.39969	9.37172	2.01286	1.00925	2.01286	up	2.85497e-11	3.59883e-10
4121	MAN1A1	mannosidase, alpha, class 1A, member 1	8.35777	8.34217	8.4343	7.32884	7.28053	7.35517	-2.07998	-1.05657	2.07998	down	3.30983e-10	2.58128e-09
286826	LIN9	lin-9 DREAM MuvB core complex component	6.6638	6.83596	6.72518	5.06408	5.83439	5.58477	-2.37386	-1.24723	2.37386	down	4.94119e-06	1.24652e-05
51155	HN1	hematological and neurological expressed 1	9.20098	9.32134	9.27905	7.47496	7.5142	7.44806	-3.45348	-1.78805	3.45348	down	3.87631e-13	1.54926e-11
123016	TTC8	tetratricopeptide repeat domain 8	7.69454	7.69251	7.61097	6.43003	6.5154	6.54408	-2.24934	-1.1695	2.24934	down	8.57404e-10	5.67685e-09
51537	MTFP1	mitochondrial fission process 1	8.02322	8.07311	8.09332	6.79705	6.82491	6.78824	-2.39465	-1.25982	2.39465	down	7.66932e-11	7.80656e-10
1278	COL1A2	collagen, type I, alpha 2	12.1651	12.1933	12.2642	8.08687	8.06125	8.07382	-17.5518	-4.13354	17.5518	down	1.03783e-18	2.18114e-14
100287045	FAM90A26	family with sequence similarity 90, member A26, pseudogene	4.92703	4.91918	4.68883	7.44994	7.449	7.43409	6.06005	2.59933	6.06005	up	2.92288e-12	6.40232e-11
26018	LRIG1	leucine-rich repeats and immunoglobulin-like domains 1	6.23731	6.11153	6.30982	7.69718	7.576	7.57275	2.63127	1.39576	2.63127	up	5.77917e-10	4.08377e-09
100887750	MRPS31P5	mitochondrial ribosomal protein S31 pseudogene 5	8.57139	8.59813	8.60894	7.4307	7.53736	7.58321	-2.10779	-1.07573	2.10779	down	3.22046e-10	2.51894e-09
1030	CDKN2B	cyclin-dependent kinase inhibitor 2B (p15, inhibits CDK4)	8.264	8.20777	8.16161	5.94099	6.07918	6.1021	-4.50139	-2.17037	4.50139	down	1.41504e-12	3.76982e-11
51293	CD320	CD320 molecule	7.51454	7.36845	7.66556	6.4429	6.3965	6.54895	-2.07542	-1.0534	2.07542	down	4.32461e-08	1.67785e-07
51512	GTSE1	G-2 and S-phase expressed 1	8.24699	8.18519	8.3868	6.00226	6.16279	6.01792	-4.63318	-2.212	4.63318	down	3.10466e-12	6.69541e-11
80012	PHC3	polyhomeotic homolog 3 (Drosophila)	5.57493	5.9959	6.16976	7.70574	7.81077	7.99139	3.79063	1.92244	3.79063	up	8.53789e-09	4.04063e-08
13	AADAC	arylacetamide deacetylase	3.67253	3.87941	3.73432	5.41355	5.16511	5.2503	2.85647	1.51423	2.85647	up	1.51115e-08	6.63197e-08
124790	HEXIM2	hexamethylene bis-acetamide inducible 2	7.31703	7.4493	7.58322	6.05093	5.98711	5.6847	-2.91252	-1.54227	2.91252	down	7.40158e-09	3.5668e-08
5438	POLR2I	polymerase (RNA) II (DNA directed) polypeptide I, 14.5kDa	10.6112	10.6488	10.7289	9.6779	9.56649	9.59973	-2.06803	-1.04826	2.06803	down	3.48403e-11	4.19554e-10
11264	PXMP4	peroxisomal membrane protein 4	7.88508	8.07647	8.03089	6.10367	6.04501	6.05541	-3.8091	-1.92945	3.8091	down	7.21992e-12	1.25728e-10
646670	LOC646670	uncharacterized LOC646670	10.7921	10.9193	10.9189	9.54453	9.49825	9.47901	-2.58386	-1.36953	2.58386	down	1.41527e-12	3.76982e-11
129285	PPP1R21	protein phosphatase 1 regulatory subunit 21	5.37012	5.37711	5.32159	3.80561	3.95689	3.77315	-2.85019	-1.51106	2.85019	down	5.38647e-09	2.70028e-08
27153	ZNF777	zinc finger protein 777	7.80149	7.73352	7.62628	8.89388	8.78595	8.82905	2.16725	1.11586	2.16725	up	3.61051e-10	2.76751e-09
1120	CHKB	choline kinase beta	8.21479	8.11959	8.23102	6.94674	6.91846	6.93913	-2.38451	-1.25369	2.38451	down	9.23591e-11	9.07725e-10
8697	CDC23	cell division cycle 23	5.83079	5.92612	6.18484	7.10972	7.2519	7.25774	2.33896	1.22587	2.33896	up	3.71815e-08	1.46925e-07
26524	LATS2	large tumor suppressor kinase 2	8.84836	8.71116	8.80684	10.1242	10.0403	10.0473	2.43143	1.28181	2.43143	up	7.44605e-12	1.28861e-10
54935	DUSP23	dual specificity phosphatase 23	9.74071	9.74006	9.76352	8.83203	8.61661	8.64346	-2.07158	-1.05073	2.07158	down	4.79382e-10	3.49558e-09
84135	UTP15	UTP15, U3 small nucleolar ribonucleoprotein, homolog (S. cerevisiae)	7.02458	7.1609	7.13555	8.31957	8.40684	8.42642	2.42379	1.27727	2.42379	up	1.24881e-10	1.15584e-09
105372824	LOC105372824	uncharacterized protein C21orf124	5.52685	5.36158	5.36037	6.80857	6.74822	6.28055	2.29132	1.19618	2.29132	up	1.06461e-06	3.03198e-06
64432	MRPS25	mitochondrial ribosomal protein S25	6.61782	6.59938	6.70582	7.68531	7.68031	7.6749	2.05504	1.03917	2.05504	up	1.7539e-09	1.0355e-08
168455	CCDC71L	coiled-coil domain containing 71-like	10.0975	10.1339	10.0902	8.47005	8.53513	8.44942	-3.0787	-1.62232	3.0787	down	1.25318e-13	7.04611e-12
7298	TYMS	thymidylate synthetase	11.4412	11.2889	11.2979	8.24138	8.32052	8.38995	-8.14223	-3.02542	8.14223	down	1.41155e-15	4.41273e-13
140690	CTCFL	CCCTC-binding factor (zinc finger protein)-like	12.2868	12.3472	12.3131	10.6988	10.7243	10.6916	-3.05417	-1.61078	3.05417	down	5.96483e-15	1.0297e-12
51663	ZFR	zinc finger RNA binding protein	5.97042	5.72654	6.15054	7.39365	7.51573	7.50946	2.87543	1.52378	2.87543	up	5.65816e-09	2.81697e-08
9877	ZC3H11A	zinc finger CCCH-type containing 11A	7.23772	7.15605	7.20651	8.28141	8.25915	8.35055	2.13901	1.09694	2.13901	up	2.78005e-10	2.23485e-09
64319	FBRS	fibrosin	5.43771	5.46082	5.44515	6.64945	6.47841	6.43993	2.10629	1.0747	2.10629	up	4.31352e-08	1.67438e-07
55744	COA1	cytochrome c oxidase assembly factor 1 homolog	5.52685	5.31414	5.69442	3.64275	4.3481	3.95596	-2.88692	-1.52953	2.88692	down	1.07988e-06	3.07167e-06
3899	AFF3	AF4/FMR2 family member 3	8.67165	8.54836	8.62273	7.15481	7.39176	7.29276	-2.52183	-1.33447	2.52183	down	2.6509e-10	2.15138e-09
399669	ZNF321P	zinc finger protein 321, pseudogene	5.81492	5.55438	5.7859	4.05978	4.11925	4.29162	-2.95164	-1.56152	2.95164	down	1.16458e-08	5.28369e-08
1000	CDH2	cadherin 2, type 1, N-cadherin (neuronal)	11.5033	11.5361	11.5403	10.3862	10.4581	10.4605	-2.13112	-1.09161	2.13112	down	1.42533e-12	3.78381e-11
9246	UBE2L6	ubiquitin conjugating enzyme E2L 6	8.72503	8.70284	8.71762	7.53559	7.54661	7.58552	-2.23342	-1.15926	2.23342	down	2.81368e-11	3.55826e-10
7310	ZRSR1	zinc finger (CCCH type), RNA binding motif and serine/arginine rich 1	6.04472	5.99051	5.93593	7.32111	7.42795	7.40691	2.62977	1.39494	2.62977	up	3.08436e-10	2.43196e-09
51714	SELT	selenoprotein T	9.24338	9.28233	9.32065	8.27102	8.38762	8.18716	-2.00026	-1.00019	2.00026	down	7.74104e-10	5.20379e-09
79001	VKORC1	vitamin K epoxide reductase complex subunit 1	10.5041	10.5047	10.5781	8.78479	8.63551	8.68986	-3.54453	-1.82559	3.54453	down	1.24773e-13	7.03572e-12
6383	SDC2	syndecan 2	10.2745	10.2261	10.1452	8.92829	8.77507	8.87053	-2.56203	-1.35729	2.56203	down	8.54689e-12	1.43445e-10
808	CALM3	calmodulin 3 (phosphorylase kinase, delta)	8.2577	8.32239	8.54412	7.2427	7.2666	7.27949	-2.16116	-1.11181	2.16116	down	4.59619e-09	2.35209e-08
65062	TMEM237	transmembrane protein 237	6.51093	6.3974	6.31623	4.20842	4.21332	4.2123	-4.58474	-2.19684	4.58474	down	3.45329e-11	4.16623e-10
4076	CAPRIN1	cell cycle associated protein 1	7.05898	6.81993	6.91613	5.36741	5.69983	5.63995	-2.57151	-1.36262	2.57151	down	2.49003e-08	1.03135e-07
9214	FCMR	Fc fragment of IgM receptor	6.35648	6.06828	6.24396	4.52628	4.39922	4.59998	-3.28163	-1.71441	3.28163	down	2.30027e-09	1.30537e-08
4175	MCM6	minichromosome maintenance complex component 6	6.63054	6.61005	6.98144	4.11063	4.53953	4.1917	-5.50238	-2.46006	5.50238	down	7.04247e-10	4.80193e-09
166793	ZBTB49	zinc finger and BTB domain containing 49	5.44123	5.56831	5.38246	7.45479	7.3088	7.21039	3.63174	1.86066	3.63174	up	1.3923e-10	1.26201e-09
4436	MSH2	mutS homolog 2	8.62418	8.54445	8.39858	6.5942	6.78394	6.82799	-3.45103	-1.78703	3.45103	down	5.60034e-11	6.09935e-10
100861412	FSBP	fibrinogen silencer binding protein	5.86155	6.04925	5.71761	4.62723	5.05683	4.68339	-2.1243	-1.08699	2.1243	down	3.03372e-06	7.93711e-06
80854	SETD7	SET domain containing (lysine methyltransferase) 7	4.06995	3.89024	4.35707	5.24438	5.29968	5.00708	2.11105	1.07796	2.11105	up	4.37254e-06	1.11226e-05
91050	CCDC149	coiled-coil domain containing 149	6.35402	6.49001	6.47699	7.5625	7.55384	7.6065	2.19457	1.13394	2.19457	up	1.56967e-09	9.44387e-09
8862	APLN	apelin	7.19946	7.18278	7.09599	5.4737	5.73092	5.88191	-2.75853	-1.4639	2.75853	down	9.19443e-09	4.30391e-08
11333	PDAP1	PDGFA associated protein 1	6.26635	6.2981	6.3787	5.43364	5.27766	5.21119	-2.00957	-1.00689	2.00957	down	1.55213e-07	5.2377e-07
4957	ODF2	outer dense fiber of sperm tails 2	7.0159	6.98927	7.1539	8.09225	8.09192	8.10942	2.06314	1.04484	2.06314	up	1.4744e-09	8.9506e-09
255104	TMCO4	transmembrane and coiled-coil domains 4	7.49379	7.52326	7.62802	5.98854	5.83317	5.7913	-3.19841	-1.67735	3.19841	down	1.16915e-10	1.09715e-09
8045	RASSF7	Ras association (RalGDS/AF-6) domain family (N-terminal) member 7	7.42472	7.4899	7.50157	5.94802	6.06537	5.85324	-2.861	-1.51652	2.861	down	2.64259e-10	2.14553e-09
4678	NASP	nuclear autoantigenic sperm protein (histone-binding)	7.50262	7.64579	7.59296	6.12898	6.30259	6.10745	-2.64045	-1.40078	2.64045	down	7.12078e-10	4.84603e-09
92305	TMEM129	transmembrane protein 129	8.32705	8.39681	8.56101	6.60379	6.45215	6.23085	-3.99823	-1.99936	3.99823	down	1.29191e-10	1.18758e-09
23053	ZSWIM8	zinc finger, SWIM-type containing 8	4.03368	4.3614	4.18936	5.28912	5.75497	5.47793	2.48376	1.31253	2.48376	up	5.74791e-07	1.7205e-06
5827	PXMP2	peroxisomal membrane protein 2	8.98369	8.72751	8.5265	5.40044	5.5314	5.61115	-9.3929	-3.23157	9.3929	down	1.93495e-12	4.6964e-11
6422	SFRP1	secreted frizzled-related protein 1	9.4398	9.43108	9.35289	8.32175	8.42098	8.32517	-2.07334	-1.05196	2.07334	down	8.33247e-11	8.3552e-10
254225	RNF169	ring finger protein 169	8.53186	8.61485	8.47656	9.53285	9.64934	9.70652	2.1265	1.08848	2.1265	up	2.76969e-10	2.22836e-09
92344	GORAB	golgin, RAB6-interacting	7.60899	7.51875	7.55381	8.52677	8.57718	8.63628	2.0273	1.01956	2.0273	up	4.13722e-10	3.09027e-09
1386	ATF2	activating transcription factor 2	6.48915	6.50505	6.59409	7.89683	7.86976	8.07522	2.67185	1.41784	2.67185	up	2.91835e-10	2.32498e-09
30011	SH3KBP1	SH3-domain kinase binding protein 1	8.47252	8.32662	8.48325	7.31591	7.05984	7.0328	-2.44745	-1.29128	2.44745	down	2.58752e-09	1.44076e-08
54958	TMEM160	transmembrane protein 160	9.59929	9.46041	9.69367	7.84789	7.8461	7.70067	-3.44914	-1.78624	3.44914	down	6.87023e-12	1.21041e-10
10346	TRIM22	tripartite motif containing 22	7.02505	6.98881	7.16425	4.97308	4.96669	4.94963	-4.27593	-2.09624	4.27593	down	1.74062e-11	2.46353e-10
1303	COL12A1	collagen, type XII, alpha 1	9.60227	9.56976	9.50155	8.08422	8.36159	8.38581	-2.42949	-1.28065	2.42949	down	9.8012e-10	6.34529e-09
317781	DDX51	DEAD (Asp-Glu-Ala-Asp) box polypeptide 51	5.41864	5.47991	5.60534	6.8018	6.60265	6.70336	2.29948	1.20131	2.29948	up	1.8287e-08	7.85415e-08
84902	CEP89	centrosomal protein 89kDa	6.13418	5.95446	6.21523	5.04945	4.97985	4.95698	-2.15228	-1.10586	2.15228	down	1.0702e-07	3.74665e-07
8408	ULK1	unc-51 like autophagy activating kinase 1	6.81277	6.81245	6.74307	8.32616	8.33468	8.32648	2.90729	1.53968	2.90729	up	5.73102e-12	1.05584e-10
23064	SETX	senataxin	8.02489	7.98547	7.9659	9.10429	9.04216	9.06359	2.111	1.07793	2.111	up	3.82642e-11	4.51907e-10
63967	CLSPN	claspin	7.19144	7.24432	7.24616	5.27918	5.36442	5.55635	-3.54878	-1.82732	3.54878	down	1.49757e-10	1.34098e-09
55765	C1orf106	chromosome 1 open reading frame 106	4.85761	4.89678	5.0382	3.84937	3.81201	4.1062	-2.01159	-1.00834	2.01159	down	1.7129e-06	4.69918e-06
11044	PAPD7	PAP associated domain containing 7	9.2907	9.24006	9.2733	10.5579	10.6095	10.5781	2.48599	1.31382	2.48599	up	3.36635e-13	1.39647e-11
115209	OMA1	OMA1 zinc metallopeptidase	6.61905	6.55723	6.61345	5.25552	5.00275	4.93999	-2.88884	-1.53049	2.88884	down	4.02596e-09	2.09903e-08
3006	HIST1H1C	histone cluster 1, H1c	8.98377	8.95595	9.28121	6.60316	6.51796	6.26317	-6.11441	-2.61221	6.11441	down	1.3149e-11	1.99853e-10
55814	BDP1	B double prime 1, subunit of RNA polymerase III transcription initiation factor IIIB	5.38491	5.05282	5.41524	6.31331	6.13456	6.49881	2.04378	1.03124	2.04378	up	2.72436e-06	7.20345e-06
1728	NQO1	NAD(P)H dehydrogenase, quinone 1	12.4307	12.3544	12.3559	10.9522	10.9963	11.0724	-2.59075	-1.37337	2.59075	down	3.69273e-13	1.48917e-11
23270	TSPYL4	TSPY-like 4	9.88136	9.62496	9.83373	7.15637	7.24808	7.14662	-6.04745	-2.59633	6.04745	down	1.34331e-13	7.35192e-12
8370	HIST2H4A	histone cluster 2, H4a	5.34573	5.37329	5.72715	4.6869	4.19479	4.33838	-2.10726	-1.07537	2.10726	down	9.44764e-06	2.27527e-05
8462	KLF11	Kruppel-like factor 11	6.53667	6.56612	6.61976	7.98114	8.0313	8.05587	2.72941	1.44859	2.72941	up	3.02061e-11	3.75314e-10
1604	CD55	CD55 molecule, decay accelerating factor for complement (Cromer blood group)	8.82717	8.9703	8.80215	10.6029	10.8426	10.8712	3.74695	1.90572	3.74695	up	6.51321e-12	1.16205e-10
23252	OTUD3	OTU deubiquitinase 3	4.1834	4.07119	4.34819	5.80012	5.98001	5.95027	3.26981	1.70921	3.26981	up	2.762e-09	1.52015e-08
7988	ZNF212	zinc finger protein 212	8.14776	8.27415	8.16495	9.59576	9.68174	9.70983	2.76413	1.46682	2.76413	up	3.9207e-12	7.97965e-11
64151	NCAPG	non-SMC condensin I complex subunit G	9.78323	9.73979	9.8051	6.89167	6.98894	6.78174	-7.40546	-2.88859	7.40546	down	8.56898e-15	1.33406e-12
643911	CRNDE	colorectal neoplasia differentially expressed (non-protein coding)	9.70621	9.68444	9.47301	8.22775	8.64592	8.65282	-2.16204	-1.11239	2.16204	down	1.98282e-07	6.53091e-07
145407	C14orf37	chromosome 14 open reading frame 37	8.58458	8.44296	8.54223	6.81807	6.80006	6.86338	-3.24021	-1.69609	3.24021	down	3.89008e-12	7.93386e-11
729967	MORN2	MORN repeat containing 2	7.19793	7.20012	7.19412	5.46297	5.61827	5.52466	-3.16475	-1.66209	3.16475	down	8.76788e-11	8.696e-10
55004	LAMTOR1	late endosomal/lysosomal adaptor, MAPK and MTOR activator 1	11.1833	11.1953	11.2139	9.54502	9.54232	9.4654	-3.20412	-1.67993	3.20412	down	1.96763e-14	2.18435e-12
3607	FOXK2	forkhead box K2	7.89189	7.84549	7.93151	8.9455	8.95932	8.94028	2.08311	1.05874	2.08311	up	5.94704e-11	6.38441e-10
653145	ANXA8	annexin A8	6.91066	6.59015	6.68645	3.82381	4.3313	3.23269	-7.63778	-2.93315	7.63778	down	1.74315e-08	7.53007e-08
1977	EIF4E	eukaryotic translation initiation factor 4E	3.83632	3.11456	3.95689	6.04698	6.54589	6.63869	6.84285	2.7746	6.84285	up	2.51982e-08	1.0422e-07
219333	USP12	ubiquitin specific peptidase 12	6.94956	6.80108	6.87986	8.81944	8.82535	8.80921	3.84016	1.94117	3.84016	up	5.01379e-13	1.82594e-11
2543	GAGE1	G antigen 1	3.70658	3.58294	3.72375	4.8089	5.24947	5.21758	2.67751	1.42089	2.67751	up	1.83979e-07	6.09576e-07
55603	FAM46A	family with sequence similarity 46 member A	7.7021	7.73037	7.93915	6.63178	6.48724	6.4626	-2.4005	-1.26333	2.4005	down	3.49959e-09	1.85958e-08
91351	DDX60L	DEAD (Asp-Glu-Ala-Asp) box polypeptide 60-like	7.13487	7.08105	7.06967	4.71998	5.09472	4.91475	-4.54847	-2.18538	4.54847	down	9.90803e-11	9.60258e-10
23001	WDFY3	WD repeat and FYVE domain containing 3	7.24829	7.19533	7.20659	8.93817	9.10787	9.0835	3.54662	1.82644	3.54662	up	1.26997e-12	3.48012e-11
27243	CHMP2A	charged multivesicular body protein 2A	10.3692	10.3095	10.3325	8.9472	8.99728	8.94796	-2.58991	-1.3729	2.58991	down	3.56863e-13	1.45262e-11
54834	GDAP2	ganglioside induced differentiation associated protein 2	7.123	7.17402	7.23824	8.55231	8.4637	8.49815	2.50759	1.3263	2.50759	up	3.61174e-11	4.3227e-10
157489	SDAD1P1	SDA1 domain containing 1 pseudogene 1	5.60281	5.62954	5.44344	6.55799	6.67857	6.64473	2.09725	1.0685	2.09725	up	4.32904e-08	1.67923e-07
5308	PITX2	paired-like homeodomain 2	6.79231	6.59517	6.5389	4.10734	4.19791	4.28032	-5.45257	-2.44694	5.45257	down	2.7417e-11	3.49209e-10
55290	BRF2	BRF2, RNA polymerase III transcription initiation factor 50 kDa subunit	7.88983	7.92332	7.88449	9.19406	9.19614	9.18016	2.44682	1.29091	2.44682	up	3.04353e-12	6.59269e-11
51661	FKBP7	FK506 binding protein 7	6.00514	5.88037	6.06828	4.48719	4.51312	4.51404	-2.78913	-1.47981	2.78913	down	3.06634e-09	1.66099e-08
56288	PARD3	par-3 family cell polarity regulator	6.01278	5.97121	6.27794	7.46612	7.66901	7.47259	2.72942	1.4486	2.72942	up	4.76007e-09	2.42547e-08
10682	EBP	emopamil binding protein (sterol isomerase)	10.0631	10.1505	10.3079	8.26756	8.22765	8.20099	-3.84173	-1.94176	3.84173	down	8.01289e-13	2.51704e-11
7091	TLE4	transducin like enhancer of split 4	8.13751	8.22106	8.15391	6.87311	6.86648	6.89517	-2.44965	-1.29257	2.44965	down	5.08766e-11	5.63841e-10
80025	PANK2	pantothenate kinase 2	5.74012	5.33563	5.83154	7.66523	7.53907	7.57749	3.88568	1.95817	3.88568	up	1.48277e-09	8.9905e-09
10329	TMEM5	transmembrane protein 5	7.72198	7.80733	7.72767	6.18949	6.6403	6.59327	-2.42498	-1.27797	2.42498	down	5.96132e-08	2.2277e-07
9150	CTDP1	CTD phosphatase subunit 1	7.01177	7.05543	6.95344	8.49642	8.5017	8.53567	2.83703	1.50438	2.83703	up	6.33013e-12	1.13469e-10
6349	CCL3L1	chemokine (C-C motif) ligand 3-like 1	5.75738	5.97167	5.78247	8.40368	8.68661	8.28467	6.15239	2.62115	6.15239	up	1.27382e-11	1.94822e-10
80301	PLEKHO2	pleckstrin homology domain containing O2	6.90665	6.90346	7.19565	8.87068	8.78878	8.6841	3.43252	1.77927	3.43252	up	1.05794e-10	1.01054e-09
7001	PRDX2	peroxiredoxin 2	10.4504	10.5381	10.5426	9.2767	9.19047	9.19684	-2.44364	-1.28903	2.44364	down	2.18454e-12	5.13742e-11
54996	MARC2	mitochondrial amidoxime reducing component 2	7.01612	6.82381	6.86375	5.87229	5.77288	5.82492	-2.11091	-1.07786	2.11091	down	2.18272e-08	9.17931e-08
114803	MYSM1	Myb-like, SWIRM and MPN domains 1	4.8155	4.50743	4.283	6.46513	6.51651	6.61965	3.99571	1.99845	3.99571	up	3.50421e-09	1.86178e-08
78996	C7orf49	chromosome 7 open reading frame 49	9.45982	9.53095	9.65917	8.33334	8.28447	8.29144	-2.3733	-1.2469	2.3733	down	4.75002e-11	5.32768e-10
474343	SPIN2B	spindlin family member 2B	7.89998	7.89494	7.87217	6.83905	6.96719	6.84175	-2.00885	-1.00637	2.00885	down	2.21449e-09	1.26607e-08
64770	CCDC14	coiled-coil domain containing 14	9.77361	9.70187	9.5991	7.80358	7.77661	7.84135	-3.69186	-1.88435	3.69186	down	3.25174e-13	1.37075e-11
4330	MN1	meningioma (disrupted in balanced translocation) 1	6.95149	6.96716	7.12605	5.39792	5.31931	5.56982	-3.00192	-1.58588	3.00192	down	1.23254e-09	7.67186e-09
140612	ZFP28	ZFP28 zinc finger protein	4.06344	4.14994	4.01191	5.19764	5.54925	5.41971	2.4859	1.31377	2.4859	up	9.59578e-08	3.40329e-07
5828	PEX2	peroxisomal biogenesis factor 2	6.12009	6.10341	6.38714	4.96478	5.08207	4.85261	-2.35718	-1.23706	2.35718	down	9.62396e-08	3.41232e-07
6161	RPL32	ribosomal protein L32	6.95611	7.07341	7.33049	8.43971	8.29801	8.21317	2.29256	1.19696	2.29256	up	2.96299e-08	1.20321e-07
80179	MYO19	myosin XIX	8.99835	8.85363	8.89525	7.65536	7.64314	7.63131	-2.41575	-1.27247	2.41575	down	2.70509e-11	3.45706e-10
148254	ZNF555	zinc finger protein 555	5.8863	5.76473	5.67861	7.00549	7.28942	7.11435	2.56663	1.35987	2.56663	up	7.41148e-09	3.57069e-08
84218	TBC1D3F	TBC1 domain family member 3F	7.68451	7.54391	7.4359	8.61131	8.881	8.6949	2.25683	1.1743	2.25683	up	6.85411e-09	3.33755e-08
351	APP	amyloid beta (A4) precursor protein	10.3938	10.3403	10.2382	11.2128	11.3203	11.4538	2.00676	1.00487	2.00676	up	1.36252e-09	8.36104e-09
285190	RGPD4	RANBP2-like and GRIP domain containing 4	5.95084	5.87509	5.83524	6.92419	7.52456	7.63288	2.77692	1.47349	2.77692	up	5.13979e-07	1.5519e-06
27067	STAU2	staufen double-stranded RNA binding protein 2	6.18193	6.25394	6.29623	4.66305	4.75301	4.78566	-2.84835	-1.51013	2.84835	down	1.48552e-09	9.00414e-09
57552	NCEH1	neutral cholesterol ester hydrolase 1	9.34748	9.37276	9.16334	8.10535	8.33731	8.37877	-2.02893	-1.02072	2.02893	down	2.07374e-08	8.77483e-08
3756	KCNH1	potassium channel, voltage gated eag related subfamily H, member 1	7.86016	7.71844	7.94529	6.25218	6.13942	6.03703	-3.24545	-1.69842	3.24545	down	1.59711e-10	1.41456e-09
25934	NIPSNAP3A	nipsnap homolog 3A (C. elegans)	9.18184	9.16315	9.10802	7.15689	7.1295	7.17183	-3.99519	-1.99826	3.99519	down	7.684e-14	5.09073e-12
29923	HILPDA	hypoxia inducible lipid droplet-associated	7.71679	7.64625	7.69444	6.54846	6.57587	6.47762	-2.22198	-1.15184	2.22198	down	6.9928e-10	4.77473e-09
9139	CBFA2T2	core-binding factor, runt domain, alpha subunit 2; translocated to, 2	5.92901	6.03757	6.06736	7.62867	7.70226	7.72604	3.19174	1.67434	3.19174	up	3.48672e-11	4.19749e-10
374395	TMEM179B	transmembrane protein 179B	9.47342	9.49366	9.76185	7.49985	7.64287	7.44538	-4.1323	-2.04694	4.1323	down	1.22501e-11	1.89433e-10
645	BLVRB	biliverdin reductase B	10.5287	10.5332	10.5566	8.8039	8.75876	8.77059	-3.39113	-1.76177	3.39113	down	1.29921e-14	1.73274e-12
148932	MOB3C	MOB kinase activator 3C	5.1359	5.16931	4.71232	6.38674	6.51254	6.36446	2.66734	1.4154	2.66734	up	9.92661e-08	3.50535e-07
5552	SRGN	serglycin	10.5413	10.419	10.4669	9.32404	9.47543	9.43435	-2.09141	-1.06448	2.09141	down	8.77181e-11	8.69769e-10
51626	DYNC2LI1	dynein, cytoplasmic 2, light intermediate chain 1	7.6942	7.73294	7.8094	6.15456	6.50412	6.53454	-2.54519	-1.34777	2.54519	down	1.29628e-08	5.79705e-08
24137	KIF4A	kinesin family member 4A	9.83455	9.91511	9.96291	7.98126	7.93822	7.78672	-4.00589	-2.00212	4.00589	down	5.07311e-13	1.84583e-11
10848	PPP1R13L	protein phosphatase 1 regulatory subunit 13 like	8.42583	8.39471	8.37558	7.37926	7.33228	7.4424	-2.01959	-1.01406	2.01959	down	4.60419e-10	3.37874e-09
8082	SSPN	sarcospan	7.25446	7.48581	7.37009	5.49917	5.6428	5.52396	-3.51813	-1.81481	3.51813	down	1.06562e-10	1.01614e-09
57120	GOPC	golgi-associated PDZ and coiled-coil motif containing	9.40186	9.33933	9.25684	7.1242	7.48762	7.5578	-3.84452	-1.9428	3.84452	down	1.92802e-10	1.65113e-09
8603	FAM193A	family with sequence similarity 193 member A	6.17196	5.93314	6.28269	7.21459	7.1676	7.19955	2.09166	1.06465	2.09166	up	8.61972e-08	3.09276e-07
57325	CSRP2BP	CSRP2 binding protein	7.63625	7.50836	7.88931	6.0484	6.23706	6.16505	-2.88346	-1.5278	2.88346	down	3.52222e-09	1.87033e-08
23600	AMACR	alpha-methylacyl-CoA racemase	5.3446	5.03237	5.16364	3.96352	4.08047	4.29628	-2.09475	-1.06678	2.09475	down	1.86122e-06	5.07295e-06
1903	S1PR3	sphingosine-1-phosphate receptor 3	5.82638	5.70797	5.86011	3.76855	4.36253	4.23826	-3.19328	-1.67504	3.19328	down	8.73582e-08	3.12982e-07
56006	SMG9	SMG9 nonsense mediated mRNA decay factor	7.78312	7.83908	7.87684	9.01475	8.86922	8.93898	2.15542	1.10797	2.15542	up	1.66111e-10	1.46394e-09
101060226	NBPF19	neuroblastoma breakpoint family member 19	9.74999	9.73652	9.82205	11.0931	10.9846	11.0119	2.39552	1.26034	2.39552	up	1.94704e-12	4.71278e-11
10734	STAG3	stromal antigen 3	7.13418	7.33715	7.28287	5.47748	5.57805	5.47748	-3.34127	-1.7404	3.34127	down	1.23378e-10	1.1441e-09
199745	THAP8	THAP domain containing 8	7.33282	7.46758	7.44685	5.28388	5.39809	5.68366	-3.89208	-1.96054	3.89208	down	4.07226e-10	3.05611e-09
27068	PPA2	pyrophosphatase (inorganic) 2	8.88646	8.8645	8.65527	6.60761	6.75834	6.72313	-4.30412	-2.10572	4.30412	down	3.70717e-12	7.6332e-11
56953	NT5M	5',3'-nucleotidase, mitochondrial	5.94985	5.68656	5.84935	4.99062	4.27183	4.55688	-2.33293	-1.22214	2.33293	down	6.51374e-06	1.61059e-05
375341	C3orf62	chromosome 3 open reading frame 62	5.66159	5.71869	5.9138	6.88505	6.76198	6.90547	2.12305	1.08614	2.12305	up	5.70274e-08	2.14419e-07
9956	HS3ST2	heparan sulfate-glucosamine 3-sulfotransferase 2	5.37017	5.32221	4.96589	6.53974	6.68609	6.65185	2.65088	1.40647	2.65088	up	4.07788e-08	1.5924e-07
100913187	APOBEC3A_B	APOBEC3A and APOBEC3B deletion hybrid	9.01974	9.10982	9.15047	7.33207	6.73693	6.75587	-4.44357	-2.15172	4.44357	down	1.70767e-09	1.0123e-08
22822	PHLDA1	pleckstrin homology-like domain, family A, member 1	7.87821	7.94674	7.94793	11.7324	11.7712	11.7668	14.246	3.83249	14.246	up	2.51606e-18	2.18114e-14
23157	SEPT6	septin 6	6.68214	6.82943	6.56538	4.47737	4.96347	4.64049	-3.99595	-1.99854	3.99595	down	3.24219e-09	1.74463e-08
4638	MYLK	myosin light chain kinase	10.877	10.8655	10.6367	9.27428	9.49506	9.63131	-2.50741	-1.3262	2.50741	down	3.66632e-09	1.93711e-08
10409	BASP1	brain abundant, membrane attached signal protein 1	10.9484	10.8454	10.8613	9.79864	9.90505	9.8695	-2.0382	-1.0273	2.0382	down	2.65253e-11	3.40516e-10
2697	GJA1	gap junction protein alpha 1	6.92478	7.0105	6.9791	5.27212	5.2019	5.09881	-3.43549	-1.78052	3.43549	down	1.03327e-10	9.93046e-10
85013	TMEM128	transmembrane protein 128	8.08411	8.16418	8.12635	6.71708	7.10569	7.23219	-2.15332	-1.10656	2.15332	down	3.4356e-07	1.07661e-06
23780	APOL2	apolipoprotein L, 2	5.8641	5.92223	5.92773	4.18856	4.22347	4.21103	-3.24226	-1.697	3.24226	down	4.63176e-10	3.39542e-09
134429	STARD4	StAR related lipid transfer domain containing 4	4.54688	4.47328	4.51908	6.5473	6.60142	6.89047	4.4898	2.16665	4.4898	up	1.67905e-10	1.47609e-09
118980	SFXN2	sideroflexin 2	7.8606	7.91234	7.81004	5.59517	5.62787	5.71641	-4.64124	-2.21451	4.64124	down	1.51598e-12	3.9546e-11
80351	TNKS2	tankyrase, TRF1-interacting ankyrin-related ADP-ribose polymerase 2	6.82036	6.53399	6.651	7.82204	7.96504	8.05676	2.42754	1.2795	2.42754	up	6.23352e-09	3.0725e-08
3151	HMGN2	high mobility group nucleosomal binding domain 2	7.68403	7.67433	7.81884	5.39493	5.33213	5.29967	-5.21797	-2.38349	5.21797	down	1.42765e-12	3.78738e-11
7694	ZNF135	zinc finger protein 135	7.01699	6.8811	6.86738	5.65342	5.78008	5.66937	-2.33087	-1.22087	2.33087	down	5.47917e-09	2.74288e-08
80853	KDM7A	lysine (K)-specific demethylase 7A	6.5989	6.57096	6.65632	8.84529	8.88842	8.82851	4.74151	2.24535	4.74151	up	6.72941e-14	4.70314e-12
57539	WDR35	WD repeat domain 35	6.41768	6.38047	6.4183	5.06625	5.10664	5.26857	-2.39219	-1.25833	2.39219	down	1.03795e-08	4.77739e-08
222389	BEND7	BEN domain containing 7	7.83941	7.67882	7.65298	8.77543	8.73616	8.66552	2.00273	1.00197	2.00273	up	2.07978e-09	1.201e-08
8894	EIF2S2	eukaryotic translation initiation factor 2 subunit beta	7.48141	7.37303	7.33686	6.40016	6.3048	6.43354	-2.02455	-1.0176	2.02455	down	1.09799e-08	5.01942e-08
54856	GON4L	gon-4-like (C. elegans)	6.64949	6.56303	6.82536	7.89135	7.72282	7.79101	2.17714	1.12243	2.17714	up	1.13401e-08	5.16175e-08
1462	VCAN	versican	5.02917	5.1367	5.07535	3.75849	4.04893	4.11494	-2.15291	-1.10629	2.15291	down	7.53081e-07	2.20122e-06
54465	ETAA1	Ewing tumor-associated antigen 1	7.26159	7.31424	7.4277	5.27889	5.56233	5.34331	-3.83617	-1.93967	3.83617	down	1.38862e-10	1.259e-09
55686	MREG	melanoregulin	7.30187	7.42011	7.40229	8.62026	8.84202	8.88819	2.65504	1.40873	2.65504	up	3.04446e-10	2.40729e-09
9766	SUSD6	sushi domain containing 6	8.29815	8.32667	8.51933	9.62919	9.72141	9.75603	2.49809	1.32083	2.49809	up	1.08631e-10	1.03158e-09
1116	CHI3L1	chitinase 3 like 1	8.49585	8.47771	8.45163	7.33779	7.4654	7.50125	-2.05658	-1.04025	2.05658	down	7.48658e-10	5.05535e-09
1438	CSF2RA	colony stimulating factor 2 receptor, alpha, low-affinity (granulocyte-macrophage)	5.83639	5.63777	5.77312	4.38119	4.52933	4.54719	-2.40026	-1.26319	2.40026	down	3.81358e-08	1.50134e-07
254170	FBXO33	F-box protein 33	7.45696	7.38597	7.50897	8.62568	8.69227	8.70455	2.33518	1.22353	2.33518	up	6.1484e-11	6.54484e-10
23660	ZKSCAN5	zinc finger with KRAB and SCAN domains 5	6.2767	6.30412	6.17397	7.83553	7.93829	7.95672	3.15706	1.65858	3.15706	up	2.73681e-11	3.48701e-10
26037	SIPA1L1	signal-induced proliferation-associated 1 like 1	7.98665	7.94117	8.09964	9.42624	9.44683	9.48092	2.71731	1.44218	2.71731	up	4.99431e-12	9.5715e-11
11340	EXOSC8	exosome component 8	11.0131	10.945	10.9467	9.78475	9.78435	9.84565	-2.23975	-1.16334	2.23975	down	1.59203e-12	4.09827e-11
27042	DIEXF	digestive organ expansion factor homolog (zebrafish)	6.11653	6.01877	6.24195	7.57405	7.42287	7.4208	2.54351	1.34682	2.54351	up	1.84393e-09	1.08013e-08
2167	FABP4	fatty acid binding protein 4, adipocyte	8.13359	8.1869	8.2798	5.75801	5.45915	5.32334	-6.43793	-2.6866	6.43793	down	1.17111e-11	1.828e-10
114112	TXNRD3	thioredoxin reductase 3	7.35023	7.36632	7.42003	6.07163	5.89836	6.01469	-2.60985	-1.38397	2.60985	down	4.91444e-10	3.56955e-09
9215	LARGE	like-glycosyltransferase	6.68322	6.37302	6.49456	7.84153	7.55526	7.87154	2.36064	1.23918	2.36064	up	4.78632e-08	1.83523e-07
6612	SUMO3	small ubiquitin-like modifier 3	9.88342	9.7935	9.7312	8.67024	8.59853	8.66784	-2.2302	-1.15717	2.2302	down	3.33363e-11	4.04937e-10
5412	UBL3	ubiquitin like 3	8.05039	8.09195	7.9765	9.05132	9.10507	9.14396	2.08566	1.0605	2.08566	up	1.25814e-10	1.16311e-09
1788	DNMT3A	DNA (cytosine-5-)-methyltransferase 3 alpha	4.23229	4.07041	4.0727	5.14784	5.52212	5.48673	2.39567	1.26043	2.39567	up	2.89446e-07	9.21817e-07
4092	SMAD7	SMAD family member 7	7.5093	7.45894	7.4989	9.02415	9.08367	9.21526	3.07087	1.61865	3.07087	up	4.80793e-12	9.28258e-11
4620	MYH2	myosin, heavy chain 2, skeletal muscle, adult	6.10716	6.49081	6.3912	4.96359	5.11521	4.89581	-2.52833	-1.33819	2.52833	down	7.93593e-08	2.87301e-07
54930	HAUS4	HAUS augmin like complex subunit 4	9.25432	9.11444	9.2153	8.0199	7.97938	7.9834	-2.29813	-1.20046	2.29813	down	3.09988e-11	3.83822e-10
130827	TMEM182	transmembrane protein 182	6.52699	6.44927	6.30147	4.36578	4.49483	4.14553	-4.25905	-2.09053	4.25905	down	5.1681e-10	3.72265e-09
26586	CKAP2	cytoskeleton associated protein 2	9.58847	9.35921	9.23657	7.69243	7.78196	7.90449	-3.0352	-1.60179	3.0352	down	3.81766e-10	2.89784e-09
51480	VCX2	variable charge, X-linked 2	10.1838	10.2179	10.3067	9.10914	9.20336	9.13346	-2.12506	-1.0875	2.12506	down	2.92818e-11	3.66511e-10
101060521	LOC101060521	DNA-directed RNA polymerase III subunit RPC5	8.76571	8.75556	8.95022	10.2876	10.1996	10.1977	2.64721	1.40447	2.64721	up	1.68108e-11	2.39925e-10
54904	WHSC1L1	Wolf-Hirschhorn syndrome candidate 1-like 1	8.04552	8.114	8.19619	7.03009	7.13418	7.16403	-2.01271	-1.00914	2.01271	down	3.184e-09	1.71805e-08
9711	RUBCN	RUN domain and cysteine-rich domain containing, Beclin 1-interacting protein	5.85597	5.79736	5.93282	6.93172	6.84798	6.83752	2.01441	1.01036	2.01441	up	2.46992e-08	1.02416e-07
83698	CALN1	calneuron 1	7.00125	6.85067	7.03899	8.9945	9.06777	9.11151	4.27016	2.09429	4.27016	up	7.14056e-13	2.31754e-11
81671	VMP1	vacuole membrane protein 1	10.8742	10.6705	10.8355	9.43258	9.46002	9.41156	-2.56449	-1.35867	2.56449	down	9.42312e-12	1.54717e-10
9266	CYTH2	cytohesin 2	7.96697	7.93491	8.13037	9.76905	9.81142	9.81331	3.45139	1.78718	3.45139	up	9.68596e-13	2.87141e-11
56000	NXF3	nuclear RNA export factor 3	7.2195	7.1256	7.20858	6.27873	5.8987	5.88231	-2.24178	-1.16465	2.24178	down	1.39022e-07	4.74501e-07
84230	LRRC8C	leucine-rich repeat containing 8 family member C	7.06949	6.99495	6.99262	5.63638	5.80647	5.95346	-2.32987	-1.22025	2.32987	down	1.85257e-08	7.94481e-08
10014	HDAC5	histone deacetylase 5	7.33609	7.3385	7.49822	9.03252	8.88962	8.83616	2.88485	1.5285	2.88485	up	5.09742e-11	5.64443e-10
134553	C5orf24	chromosome 5 open reading frame 24	6.29954	6.28536	6.0801	5.14239	4.85216	4.98955	-2.34074	-1.22697	2.34074	down	8.97502e-08	3.20436e-07
3858	KRT10	keratin 10, type I	9.84429	9.82038	9.79961	8.71688	8.76519	8.70642	-2.13159	-1.09193	2.13159	down	7.58654e-12	1.30737e-10
6781	STC1	stanniocalcin 1	6.86115	6.8551	6.90008	8.21676	8.20717	8.13751	2.48809	1.31504	2.48809	up	4.39018e-11	5.01769e-10
56478	EIF4ENIF1	eukaryotic translation initiation factor 4E nuclear import factor 1	8.36298	8.33884	8.31707	9.54612	9.48706	9.58936	2.29933	1.20122	2.29933	up	8.27676e-12	1.39747e-10
729993	SHISA9	shisa family member 9	5.67747	5.55416	5.52197	4.23741	3.95527	4.22009	-2.7263	-1.44694	2.7263	down	2.40577e-08	1.0015e-07
140707	BRI3BP	BRI3 binding protein	6.75297	6.35722	6.51736	4.92118	4.65383	4.82754	-3.34421	-1.74167	3.34421	down	5.97603e-09	2.95826e-08
25939	SAMHD1	SAM domain and HD domain 1	6.50941	6.42648	6.4574	4.49564	4.7748	4.35743	-3.78897	-1.92181	3.78897	down	1.34972e-09	8.29555e-09
473	RERE	arginine-glutamic acid dipeptide (RE) repeats	7.26384	7.19724	7.35936	8.69392	8.60472	8.69943	2.62541	1.39254	2.62541	up	3.78596e-11	4.48315e-10
9373	PLAA	phospholipase A2-activating protein	9.01744	9.01842	9.03875	10.5215	10.3682	10.4731	2.69342	1.42944	2.69342	up	1.20483e-12	3.3534e-11
100526739	APITD1-CORT	APITD1-CORT readthrough	8.24667	8.2351	8.36328	5.53908	5.83731	5.73342	-5.97282	-2.57841	5.97282	down	1.95527e-12	4.72518e-11
79694	MANEA	mannosidase, endo-alpha	7.2582	7.30982	7.2064	4.58449	4.98029	4.87649	-5.44293	-2.44438	5.44293	down	4.58582e-11	5.18819e-10
55347	ABHD10	abhydrolase domain containing 10	9.00978	8.96932	8.90679	7.29556	7.32926	7.31784	-3.13343	-1.64774	3.13343	down	9.50996e-13	2.83464e-11
89122	TRIM4	tripartite motif containing 4	5.14433	5.2028	5.38628	6.76422	6.90008	7.03684	3.15122	1.65591	3.15122	up	1.77675e-09	1.04753e-08
286527	TMSB15B	thymosin beta 15B	8.70491	8.59159	8.67055	6.17861	6.20493	6.10451	-5.62947	-2.493	5.62947	down	8.21925e-14	5.31308e-12
54629	FAM63B	family with sequence similarity 63 member B	6.3019	6.33334	6.42117	5.27604	5.5424	5.12881	-2.05108	-1.03639	2.05108	down	7.87389e-07	2.29293e-06
25903	OLFML2B	olfactomedin like 2B	5.79527	5.70067	5.73608	4.78348	4.72961	4.63501	-2.03916	-1.02797	2.03916	down	1.45703e-07	4.95143e-07
23265	EXOC7	exocyst complex component 7	8.94469	8.76533	8.81392	10.0787	10.0357	10.1087	2.35061	1.23303	2.35061	up	2.50625e-11	3.26188e-10
8714	ABCC3	ATP binding cassette subfamily C member 3	6.96087	7.09166	7.16964	5.49494	5.48052	5.51685	-2.9827	-1.57662	2.9827	down	3.32723e-10	2.59362e-09
130162	CLHC1	clathrin heavy chain linker domain containing 1	7.00248	6.8958	6.92616	5.67487	5.90104	5.73762	-2.25059	-1.1703	2.25059	down	1.30357e-08	5.82434e-08
23576	DDAH1	dimethylarginine dimethylaminohydrolase 1	8.058	7.80098	7.974	6.67215	6.69273	6.80635	-2.33041	-1.22058	2.33041	down	2.96924e-09	1.6167e-08
84695	LOXL3	lysyl oxidase like 3	11.2061	11.2313	11.296	9.68464	9.57249	9.63205	-3.06252	-1.61472	3.06252	down	1.12022e-13	6.50442e-12
22879	MON1B	MON1 homolog B, secretory trafficking associated	7.94031	7.85568	7.94506	9.06931	8.99854	8.97519	2.14453	1.10066	2.14453	up	8.28559e-11	8.31474e-10
23784	POTEH	POTE ankyrin domain family member H	7.22015	7.38066	7.05505	5.9352	6.14852	6.27333	-2.14296	-1.0996	2.14296	down	2.80182e-07	8.95305e-07
79733	E2F8	E2F transcription factor 8	7.16435	6.97572	6.91011	4.26713	5.41555	4.79124	-4.56966	-2.19209	4.56966	down	4.2572e-07	1.30703e-06
51024	FIS1	fission, mitochondrial 1	10.7185	10.8021	10.9234	9.67538	9.66086	9.63213	-2.23233	-1.15855	2.23233	down	3.8577e-11	4.54059e-10
27161	AGO2	argonaute 2, RISC catalytic component	7.17376	7.11653	7.27544	9.21312	9.13879	9.20248	3.98953	1.99622	3.98953	up	3.32865e-13	1.38968e-11
57194	ATP10A	ATPase, class V, type 10A	7.04479	7.06314	7.07968	6.07165	6.0651	5.88099	-2.08006	-1.05662	2.08006	down	1.81805e-08	7.81304e-08
151313	FAHD2B	fumarylacetoacetate hydrolase domain containing 2B	6.52106	6.54443	6.68995	4.63848	4.25144	4.62585	-4.22775	-2.07989	4.22775	down	8.83209e-10	5.81715e-09
2015	ADGRE1	adhesion G protein-coupled receptor E1	8.6732	8.7051	8.69297	7.23962	7.326	7.32695	-2.62606	-1.3929	2.62606	down	8.27888e-12	1.39747e-10
22990	PCNX	pecanex homolog (Drosophila)	6.61691	6.64898	6.79322	8.20702	8.11761	8.08993	2.73552	1.45182	2.73552	up	1.07392e-10	1.02256e-09
57730	ANKRD36B	ankyrin repeat domain 36B	5.75355	5.67154	5.48181	4.91032	4.38251	4.43507	-2.08445	-1.05967	2.08445	down	8.73324e-06	2.11404e-05
9531	BAG3	BCL2 associated athanogene 3	9.52441	9.57955	9.45687	11.3395	11.4073	11.4234	3.65473	1.86977	3.65473	up	2.48433e-14	2.43051e-12
8323	FZD6	frizzled class receptor 6	10.0883	10.0263	9.92287	8.88804	8.99905	9.03463	-2.05419	-1.03857	2.05419	down	3.41315e-10	2.64739e-09
55502	HES6	hes family bHLH transcription factor 6	7.8176	7.7655	7.81443	5.84693	6.02858	6.00711	-3.57589	-1.8383	3.57589	down	1.64653e-11	2.35683e-10
55667	DENND4C	DENN/MADD domain containing 4C	6.11532	6.17495	6.17252	7.17704	7.34697	7.32727	2.18782	1.1295	2.18782	up	4.72674e-09	2.41069e-08
6196	RPS6KA2	ribosomal protein S6 kinase, 90kDa, polypeptide 2	7.49429	7.4263	7.56712	6.40933	6.24396	6.33339	-2.24546	-1.16701	2.24546	down	2.86906e-09	1.57001e-08
7277	TUBA4A	tubulin, alpha 4a	10.414	10.321	10.451	8.36677	8.19396	8.228	-4.38455	-2.13243	4.38455	down	1.14297e-13	6.59729e-12
1017	CDK2	cyclin-dependent kinase 2	9.79748	9.76256	9.8289	8.78986	8.73247	8.84781	-2.00871	-1.00627	2.00871	down	5.65673e-11	6.14193e-10
10100	TSPAN2	tetraspanin 2	5.11729	4.83541	5.1413	3.98304	3.91619	4.16291	-2.01478	-1.01062	2.01478	down	2.49854e-06	6.64594e-06
729182	FAM91A3P	family with sequence similarity 91, member A3 pseudogene	6.96723	6.98077	7.00251	8.57466	8.75751	8.695	3.23154	1.69222	3.23154	up	4.85682e-12	9.34465e-11
5300	PIN1	peptidylprolyl cis/trans isomerase, NIMA-interacting 1	9.49722	9.60487	9.60394	8.28056	8.40753	8.36346	-2.3265	-1.21816	2.3265	down	2.89875e-11	3.64187e-10
79140	CCDC28B	coiled-coil domain containing 28B	7.27259	7.30044	7.55066	5.85323	5.83311	5.84044	-2.89247	-1.5323	2.89247	down	8.24186e-10	5.49415e-09
3914	LAMB3	laminin subunit beta 3	8.35107	8.27042	8.48453	9.41024	9.3678	9.36598	2.01764	1.01267	2.01764	up	7.07222e-10	4.81885e-09
26271	FBXO5	F-box protein 5	9.63947	9.52015	9.31882	6.37221	6.49198	6.51182	-8.19159	-3.03414	8.19159	down	1.37795e-13	7.46826e-12
90799	CEP95	centrosomal protein 95kDa	7.37302	7.30196	7.29861	8.53113	8.51617	8.57982	2.32599	1.21784	2.32599	up	4.42858e-11	5.05292e-10
57559	STAMBPL1	STAM binding protein like 1	7.38807	7.29149	7.44646	5.78483	5.44792	5.52685	-3.45529	-1.78881	3.45529	down	5.28837e-10	3.79599e-09
78992	YIPF2	Yip1 domain family member 2	8.09873	8.1872	8.20832	7.0552	7.23995	7.1026	-2.04509	-1.03217	2.04509	down	3.18306e-09	1.71778e-08
23216	TBC1D1	TBC1 domain family member 1	8.60702	8.77747	8.8205	7.55792	7.37938	7.42865	-2.42785	-1.27968	2.42785	down	5.60323e-10	3.9825e-09
23	ABCF1	ATP binding cassette subfamily F member 1	9.35531	9.41482	9.47061	10.452	10.4041	10.4197	2.01628	1.01169	2.01628	up	2.10634e-11	2.85499e-10
93517	SDR42E1	short chain dehydrogenase/reductase family 42E, member 1	6.78487	6.69203	6.68026	5.78403	5.52394	5.65985	-2.08944	-1.06311	2.08944	down	6.61386e-08	2.44235e-07
51466	EVL	Enah/Vasp-like	7.97558	7.87485	7.95155	6.92472	6.6229	6.7949	-2.22399	-1.15315	2.22399	down	7.67342e-09	3.68236e-08
84925	DIRC2	disrupted in renal carcinoma 2	8.21805	8.22127	8.3128	9.15158	9.28255	9.3858	2.03158	1.0226	2.03158	up	1.65549e-09	9.86756e-09
28231	SLCO4A1	solute carrier organic anion transporter family member 4A1	6.1359	6.01398	6.22709	7.88509	7.84283	7.87951	3.34843	1.74349	3.34843	up	2.77803e-11	3.52458e-10
8317	CDC7	cell division cycle 7	8.00814	7.84589	8.04142	5.00001	4.89645	4.92548	-8.13704	-3.0245	8.13704	down	1.92841e-13	9.4078e-12
8209	C21orf33	chromosome 21 open reading frame 33	8.33659	8.27582	8.45525	6.99904	6.9741	6.93058	-2.61712	-1.38798	2.61712	down	6.91207e-11	7.17977e-10
10635	RAD51AP1	RAD51 associated protein 1	9.1442	9.01893	9.00703	6.66767	6.55321	6.67011	-5.37547	-2.42639	5.37547	down	9.9442e-14	6.02799e-12
5990	RFX2	regulatory factor X2	5.29768	5.38922	5.43941	4.22047	4.15758	4.5567	-2.09051	-1.06385	2.09051	down	1.57067e-06	4.33974e-06
151230	KLHL23	kelch like family member 23	6.6381	6.63069	6.52804	5.28388	5.39204	5.59566	-2.25806	-1.17508	2.25806	down	5.55352e-08	2.09433e-07
26580	BSCL2	Berardinelli-Seip congenital lipodystrophy 2 (seipin)	8.0589	8.27496	8.3338	6.37469	6.32284	6.37738	-3.64079	-1.86425	3.64079	down	2.62723e-11	3.38267e-10
654320	SNORA8	small nucleolar RNA, H/ACA box 8	7.30361	7.24103	7.37943	8.4577	8.4341	8.49245	2.22436	1.15339	2.22436	up	1.70981e-10	1.49736e-09
1946	EFNA5	ephrin-A5	6.65142	6.80006	6.80012	5.16104	5.31421	5.46297	-2.70906	-1.43779	2.70906	down	6.61088e-09	3.23645e-08
79982	DNAJB14	DnaJ heat shock protein family (Hsp40) member B14	4.86109	5.13274	5.13777	5.83835	6.26457	6.28252	2.12081	1.08461	2.12081	up	3.27045e-06	8.50693e-06
51027	BOLA1	bolA family member 1	8.20434	8.24835	8.34281	6.37178	6.37391	6.37508	-3.7104	-1.89158	3.7104	down	1.93269e-12	4.69382e-11
9156	EXO1	exonuclease 1	7.59019	7.52291	8.07614	5.3955	5.0616	5.26884	-5.60909	-2.48777	5.60909	down	7.56275e-10	5.09973e-09
5080	PAX6	paired box 6	6.47276	6.55389	6.5809	5.25508	5.52369	5.36592	-2.22574	-1.15429	2.22574	down	4.23682e-08	1.64738e-07
5927	KDM5A	lysine (K)-specific demethylase 5A	8.06725	8.02786	8.22153	9.35556	9.46452	9.45273	2.49445	1.31872	2.49445	up	5.87378e-11	6.32459e-10
151188	ARL6IP6	ADP ribosylation factor like GTPase 6 interacting protein 6	9.36934	9.24745	9.18718	7.4492	7.73404	7.81194	-3.0376	-1.60293	3.0376	down	4.83346e-10	3.51882e-09
10164	CHST4	carbohydrate (N-acetylglucosamine 6-O) sulfotransferase 4	6.95596	7.28353	7.19117	4.98031	4.67528	5.06559	-4.7125	-2.23649	4.7125	down	4.93442e-10	3.58047e-09
390788	CCL3P1	chemokine (C-C motif) ligand 3 pseudogene 1	5.56268	5.21569	5.42503	7.34183	7.05673	7.08467	3.38685	1.75994	3.38685	up	2.50891e-09	1.40299e-08
100131541	LOC100131541	uncharacterized LOC100131541	6.06241	6.02137	6.24713	3.47592	3.79395	4.12867	-4.96155	-2.31079	4.96155	down	4.36687e-09	2.25273e-08
23231	SEL1L3	sel-1 suppressor of lin-12-like 3 (C. elegans)	11.2777	11.1972	11.0986	9.49054	9.68531	9.73023	-2.93997	-1.5558	2.93997	down	2.16681e-11	2.91873e-10
54841	BIVM	basic, immunoglobulin-like variable motif containing	8.07802	8.06663	8.06555	6.66306	6.74732	6.59593	-2.64139	-1.4013	2.64139	down	5.91369e-11	6.35385e-10
53944	CSNK1G1	casein kinase 1, gamma 1	6.89858	6.77527	6.7579	7.87744	8.02216	8.09681	2.27871	1.18822	2.27871	up	2.21635e-09	1.26676e-08
51375	SNX7	sorting nexin 7	9.23865	9.24195	9.33026	7.68019	7.95102	7.99488	-2.62975	-1.39492	2.62975	down	5.36268e-10	3.84113e-09
79064	TMEM223	transmembrane protein 223	7.42108	7.62956	7.45442	5.26795	5.41659	5.42457	-4.3832	-2.13198	4.3832	down	2.00254e-11	2.74188e-10
11160	ERLIN2	ER lipid raft associated 2	9.65645	9.69633	9.64415	8.20709	8.24654	8.23186	-2.70785	-1.43715	2.70785	down	5.11397e-13	1.85724e-11
254863	TMEM256	transmembrane protein 256	9.60375	9.55847	9.7333	7.86394	7.72606	7.60201	-3.73516	-1.90117	3.73516	down	6.69032e-12	1.18544e-10
124944	C17orf49	chromosome 17 open reading frame 49	9.80697	9.82423	10.0007	8.80748	8.68427	8.65747	-2.23594	-1.16088	2.23594	down	3.2533e-10	2.54157e-09
147841	SPC24	SPC24, NDC80 kinetochore complex component	8.53666	8.71297	8.67337	3.94509	4.08181	3.71304	-26.4957	-4.72769	26.4957	down	1.72561e-14	1.99502e-12
105377751	LOC105377751	uncharacterized LOC105377751	6.50056	6.32676	6.60565	4.72147	5.25913	4.68883	-3.006	-1.58785	3.006	down	1.81235e-07	6.01709e-07
3417	IDH1	isocitrate dehydrogenase 1 (NADP+)	10.32	10.279	10.2905	9.01787	8.94258	9.02408	-2.46507	-1.30163	2.46507	down	9.28058e-13	2.78111e-11
390	RND3	Rho family GTPase 3	9.55451	9.53418	9.40205	11.1266	11.2223	11.305	3.29685	1.72109	3.29685	up	1.05804e-12	3.06713e-11
57455	REXO1	REX1, RNA exonuclease 1 homolog	5.26852	5.08536	5.41081	6.40309	6.48866	6.40689	2.2626	1.17798	2.2626	up	6.78031e-08	2.49533e-07
93624	TADA2B	transcriptional adaptor 2B	6.47836	6.43792	6.49983	7.74869	7.91713	7.82299	2.56253	1.35757	2.56253	up	1.9797e-10	1.68836e-09
11120	BTN2A1	butyrophilin, subfamily 2, member A1	8.52046	8.42116	8.46326	9.87433	9.83991	9.8472	2.61266	1.38552	2.61266	up	1.02425e-12	3.00253e-11
1906	EDN1	endothelin 1	7.53014	7.33391	7.48296	4.26968	3.90828	3.64767	-11.3697	-3.50713	11.3697	down	1.81494e-11	2.54375e-10
9666	DZIP3	DAZ interacting zinc finger protein 3	7.95771	7.93977	8.03551	6.69963	6.84204	6.79961	-2.293	-1.19724	2.293	down	4.85409e-10	3.53096e-09
4440	MSI1	musashi RNA binding protein 1	4.49388	4.38818	4.25018	5.22037	5.59548	5.45045	2.06292	1.04469	2.06292	up	1.78272e-06	4.87632e-06
9372	ZFYVE9	zinc finger, FYVE domain containing 9	4.27506	4.94235	4.53474	6.33404	6.1074	6.1901	3.08755	1.62646	3.08755	up	1.83102e-07	6.07133e-07
6432	SRSF7	serine/arginine-rich splicing factor 7	8.88899	8.86253	8.82768	7.73373	7.65761	7.77055	-2.20244	-1.1391	2.20244	down	6.43761e-11	6.77883e-10
81631	MAP1LC3B	microtubule associated protein 1 light chain 3 beta	9.45148	9.36845	9.40456	10.538	10.475	10.5757	2.17554	1.12138	2.17554	up	7.32526e-12	1.27392e-10
10267	RAMP1	receptor (G protein-coupled) activity modifying protein 1	7.63146	7.76825	7.6158	5.41274	5.45751	5.55268	-4.58692	-2.19753	4.58692	down	4.82408e-12	9.29998e-11
80071	CCDC15	coiled-coil domain containing 15	6.31324	5.72803	5.91405	3.54376	4.18114	3.3733	-4.87603	-2.28571	4.87603	down	1.19171e-07	4.12438e-07
79364	ZXDC	ZXD family zinc finger C	5.17282	4.91791	5.29605	6.32076	6.24157	6.27181	2.21779	1.14912	2.21779	up	1.88972e-07	6.24847e-07
8925	HERC1	HECT and RLD domain containing E3 ubiquitin protein ligase family member 1	5.96878	6.08328	6.12169	7.05764	7.16232	7.12237	2.07944	1.05619	2.07944	up	1.19732e-08	5.41022e-08
27345	KCNMB4	potassium channel subfamily M regulatory beta subunit 4	7.23353	7.30127	7.16372	5.94978	6.02383	5.47995	-2.66657	-1.41499	2.66657	down	1.22431e-07	4.22933e-07
23558	WBP2	WW domain binding protein 2	6.4444	6.2997	6.67106	7.75334	7.63857	7.62982	2.30089	1.20219	2.30089	up	2.45622e-08	1.01891e-07
117178	SSX2IP	synovial sarcoma, X breakpoint 2 interacting protein	8.30565	8.33096	8.28455	6.75321	6.61075	6.72338	-3.05521	-1.61127	3.05521	down	9.77931e-12	1.58577e-10
5959	RDH5	retinol dehydrogenase 5 (11-cis/9-cis)	6.87015	6.87872	7.19828	5.80272	5.57883	5.27093	-2.69738	-1.43156	2.69738	down	2.241e-07	7.31348e-07
55818	KDM3A	lysine (K)-specific demethylase 3A	8.56262	8.53221	8.49606	10.3243	10.3661	10.4061	3.56821	1.8352	3.56821	up	2.7021e-14	2.57537e-12
55684	RABL6	RAB, member RAS oncogene family-like 6	7.29591	7.22575	7.36284	5.96271	5.97773	5.96211	-2.50936	-1.32732	2.50936	down	5.09761e-10	3.67866e-09
2673	GFPT1	glutamine--fructose-6-phosphate transaminase 1	9.48946	9.44422	9.45728	10.6983	10.7017	10.682	2.34625	1.23036	2.34625	up	4.04061e-13	1.58529e-11
[truncated: 2,252 more rows]
